# Supplementary material for: Nickel-catalyzed allyl–allyl coupling reactions between 1,3-dienes and allylboronates
Source: Royal Society of Chemistry journal article supplement (doi:10.1039/d0cc02697b), 2020-01-01

Supporting Information For:

## Nickel-catalyzed allyl-allyl coupling reactions between 1,3-dienes and allylboronates

Ding-Wei Ji<sup>†,‡</sup>, Gu-Cheng He<sup>†</sup>, Wei-Song Zhang<sup>†</sup>, Chao-Yang Zhao<sup>†</sup>, Yan-Cheng Hu<sup>†</sup>, and Qing-An Chen<sup>\*,†</sup>

<sup>†</sup>Dalian Institute of Chemical Physics, Chinese Academy of Sciences, Dalian 116023, China

<sup>‡</sup>University of Chinese Academy of Sciences, Beijing 100049, China

### Table of Contents

|                                                                               |        |
|-------------------------------------------------------------------------------|--------|
| 1. General experimental details.....                                          | S1     |
| 2. Typical procedure for the preparation of substrates.....                   | S1-4   |
| 3. Screening of reaction conditions.....                                      | S5     |
| 4. Typical procedure for nickel-catalyzed allyl-allyl coupling reactions..... | S6-10  |
| 5. Scale-up synthesis and transformations.....                                | S11-12 |
| 6. Control and deuterium labeling experiments .....                           | S12    |
| 7. References.....                                                            | S13    |
| 8. Copy of NMR for products.....                                              | S14-60 |

**1. General experimental details:** All the reagents were commercially available and were used without further purification unless otherwise stated. Solvents were treated prior to use according to the standard methods. <sup>1</sup>H NMR and <sup>13</sup>C NMR spectra were recorded at room temperature in CDCl<sub>3</sub> on 400 MHz instrument with tetramethylsilane (TMS) as internal standard. Data are reported as follows: chemical shift in ppm (δ), multiplicity (s = singlet, d = doublet, t = triplet, q = quartet, brs = broad singlet, m = multiplet), coupling constant (Hz), and integration. Flash column chromatography was performed on commercially available silica gel (200-300 mesh). All reactions were monitored by TLC, GC-FID, GC-MS or NMR analysis. HRMS data was obtained with Micromass HPLC-Q-TOF mass spectrometer (ESI) or Agilent 6540 Accurate-MS spectrometer (Q-TOF).

### 2. Typical procedure for the preparation of substrates

Substrates **1a-1o** were synthesized according to the following procedure<sup>1</sup>.

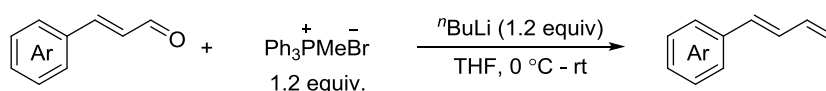

To a flame-dried round-bottom flask, methyltriphenylphosphonium bromide (6.0 mmol) in THF (40 mL) was added n-BuLi (2.4 mL, 2.5 M in THF, 6.0 mmol) slowly at 0 °C under N<sub>2</sub>. After stirring for 20 min, a cinnamaldehyde (5.0 mmol) was added. The reaction mixture was then

warmed to room temperature and stirred for another 5-10 hours. After the starting material was consumed completely which was detected by TLC, the reaction mixture was quenched with sat.  $\text{NH}_4\text{Cl}$  aq. (15 mL) and extracted with diethyl ether (20 mL  $\times$  3). The combined organic layers were dried over  $\text{MgSO}_4$ , concentrated in vacuo and purified by flash chromatography on silica gel with *n*-pentene or *n*-hexane to afford the diene products **1a-1o**.

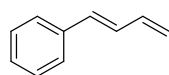

**(E)-1-(buta-1,3-dien-1-yl)benzene (1a)**<sup>1</sup>: Prepared according to the general procedure, 85% yield, yellow oil. <sup>1</sup>H NMR (400 MHz,  $\text{CDCl}_3$ )  $\delta$  7.39 (d,  $J = 7.7$  Hz, 2H), 7.30 (t,  $J = 7.5$  Hz, 2H), 7.21 (t,  $J = 7.3$  Hz, 1H), 6.78 (dd,  $J = 15.6$ , 10.5 Hz, 1H), 6.55 (d,  $J = 15.6$  Hz, 1H), 6.49 (dt,  $J = 16.9$ , 10.3 Hz, 1H), 5.32 (d,  $J = 16.9$  Hz, 1H), 5.16 (d,  $J = 10.0$  Hz, 1H). <sup>13</sup>C NMR (100 MHz,  $\text{CDCl}_3$ )  $\delta$  137.23, 137.16, 132.90, 129.66, 128.65, 127.67, 126.49, 117.66.

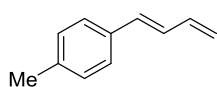

**(E)-1-(buta-1,3-dien-1-yl)-4-methylbenzene (1b)**<sup>1</sup>: Prepared according to the general procedure, 86% yield, yellow oil. <sup>1</sup>H NMR  $\delta$  7.28 (d,  $J = 8.1$  Hz, 2H), 7.10 (d,  $J = 8.0$  Hz, 2H), 6.73 (dd,  $J = 15.6$ , 10.5 Hz, 1H), 6.52 (d,  $J = 15.5$  Hz, 1H), 6.48 (dt,  $J = 16.9$ , 10.3 Hz, 1H), 5.31 – 5.26 (m, 1H), 5.14 – 5.10 (m, 1H), 2.32 (s, 3H). <sup>13</sup>C NMR (100 MHz,  $\text{CDCl}_3$ )  $\delta$  137.55, 137.38, 134.39, 132.88, 129.38, 128.74, 126.42, 117.05, 21.29.

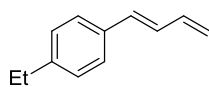

**(E)-1-(buta-1,3-dien-1-yl)-4-ethylbenzene (1c)**<sup>2</sup>: Prepared according to the general procedure, 89% yield, yellow oil. <sup>1</sup>H NMR (400 MHz,  $\text{CDCl}_3$ )  $\delta$  7.31 (d,  $J = 8.1$  Hz, 2H), 7.13 (d,  $J = 8.1$  Hz, 2H), 6.74 (dd,  $J = 15.6$ , 10.5 Hz, 1H), 6.52 (d,  $J = 16.6$  Hz, 1H), 6.48 (dt,  $J = 16.9$ , 10.0 Hz, 1H), 5.32 – 5.26 (m, 1H), 5.14 – 5.10 (m, 1H), 2.61 (q,  $J = 7.6$  Hz, 2H), 1.22 (t,  $J = 7.6$  Hz, 3H). <sup>13</sup>C NMR (100 MHz,  $\text{CDCl}_3$ )  $\delta$  143.96, 137.41, 134.66, 132.91, 128.81, 128.19, 126.51, 117.05, 28.70, 15.57.

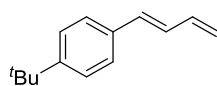

**(E)-1-(buta-1,3-dien-1-yl)-4-(tert-butyl)benzene (1d)**<sup>1</sup>: Prepared according to the general procedure, 96% yield, yellow oil. <sup>1</sup>H NMR (400 MHz,  $\text{CDCl}_3$ )  $\delta$  7.34 (s, 4H), 6.75 (dd,  $J = 15.6$ , 10.5 Hz, 1H), 6.54 (d,  $J = 15.6$  Hz, 1H), 6.49 (dt,  $J = 16.9$ , 10.2 Hz, 1H), 5.32 – 5.28 (m, 1H), 5.15 – 5.12 (m, 1H), 1.31 (s, 9H). <sup>13</sup>C NMR (100 MHz,  $\text{CDCl}_3$ )  $\delta$  150.80, 137.39, 134.38, 132.73, 128.93, 126.21, 125.57, 117.06, 34.64, 31.31.

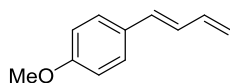

**(E)-1-(buta-1,3-dien-1-yl)-4-methoxybenzene (1e)**<sup>1</sup>: Prepared according to the general procedure, 71% yield, white solid, melting point: 43 – 44 °C. <sup>1</sup>H NMR (400 MHz,  $\text{CDCl}_3$ )  $\delta$  7.34 (d,  $J = 8.3$  Hz, 2H), 6.86 (d,  $J = 8.8$  Hz, 2H), 6.67 (dd,  $J = 15.5$ , 10.4 Hz, 1H), 6.55 – 6.42 (m, 2H), 5.31 – 5.25 (m, 1H), 5.13 – 5.07 (m, 1H), 3.81 (s, 3H). <sup>13</sup>C NMR (100 MHz,  $\text{CDCl}_3$ )  $\delta$  159.28, 137.37, 132.40, 129.93, 127.65, 127.65, 116.44, 114.07, 55.30.

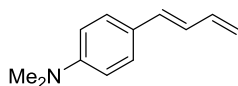

**(E)-4-(buta-1,3-dien-1-yl)-*N,N*-dimethylaniline (1f)**<sup>3</sup>: Prepared according to the general procedure, 67% yield, yellow solid, melting point: 57 – 58 °C. <sup>1</sup>H NMR (400 MHz,  $\text{CDCl}_3$ )  $\delta$  7.29 (d,  $J = 8.5$  Hz, 2H), 6.69 –

6.58 (m, 3H), 6.54 – 6.42 (m, 2H), 5.22 (dd,  $J = 17.3, 1.6$  Hz, 1H), 5.04 (dd,  $J = 9.8, 1.7$  Hz, 1H), 2.96 (s, 6H).  $^{13}\text{C}$  NMR (100 MHz,  $\text{CDCl}_3$ )  $\delta$  150.11, 137.80, 133.12, 127.52, 125.61, 125.55, 115.00, 112.38, 40.46.

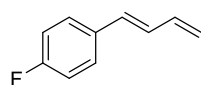

**(E)-1-(buta-1,3-dien-1-yl)-4-fluorobenzene (1g)**<sup>1</sup>: Prepared according to the general procedure, 80% yield, colorless oil.  $^1\text{H}$  NMR (400 MHz,  $\text{CDCl}_3$ )  $\delta$  7.39 – 7.31 (m, 2H), 7.03 – 6.95 (m, 2H), 6.69 (dd,  $J = 15.5, 10.5$  Hz, 1H), 6.54 – 6.41 (m, 2H), 5.35 – 5.29 (m, 1H), 5.20 – 5.13 (m, 1H).  $^{13}\text{C}$  NMR (100 MHz,  $\text{CDCl}_3$ )  $\delta$  162.33 (d,  $J = 247.2$  Hz), 136.99, 133.31 (d,  $J = 3.5$  Hz), 131.58, 129.39 (d,  $J = 2.4$  Hz), 127.91 (d,  $J = 8.0$  Hz), 117.68 (d,  $J = 1.3$  Hz), 115.56 (d,  $J = 21.7$  Hz).  $^{19}\text{F}$  NMR (376 MHz,  $\text{CDCl}_3$ )  $\delta$  -114.19

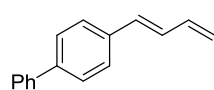

**(E)-4-(buta-1,3-dien-1-yl)-1,1'-biphenyl (1h)**<sup>1</sup>: Prepared according to the general procedure, 86% yield, white solid, melting point: 112 – 114 °C.  $^1\text{H}$  NMR (400 MHz,  $\text{CDCl}_3$ )  $\delta$  7.61 – 7.55 (m, 4H), 7.48 – 7.41 (m, 4H), 7.36 – 7.31 (m, 1H), 6.83 (dd,  $J = 15.6, 10.5$  Hz, 1H), 6.63 – 6.48 (m, 2H), 5.35 (d,  $J = 16.9$  Hz, 1H), 5.19 (d,  $J = 9.9$  Hz, 1H).  $^{13}\text{C}$  NMR (100 MHz,  $\text{CDCl}_3$ )  $\delta$  140.66, 140.34, 137.21, 136.18, 132.39, 129.71, 128.80, 127.33, 127.29, 126.91, 126.87, 117.72.

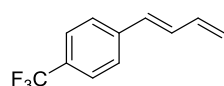

**(E)-1-(buta-1,3-dien-1-yl)-4-(trifluoromethyl)benzene (1i)**<sup>4</sup>: Prepared according to the general procedure, 87% yield, yellow oil.  $^1\text{H}$  NMR (400 MHz,  $\text{CDCl}_3$ )  $\delta$  7.55 (d,  $J = 8.3$  Hz, 2H), 7.47 (d,  $J = 8.1$  Hz, 2H), 6.85 (dd,  $J = 15.7, 10.5$  Hz, 1H), 6.56 (d,  $J = 15.7$  Hz, 1H), 6.51 (dt,  $J = 16.9, 10.3$  Hz, 1H), 5.40 (dd,  $J = 16.9, 1.2$  Hz, 1H), 5.26 (dd,  $J = 10.0, 1.4$  Hz, 1H).  $^{13}\text{C}$  NMR (100 MHz,  $\text{CDCl}_3$ )  $\delta$  140.59, 136.66, 131.97, 131.21, 129.26 (q,  $J = 32.4$  Hz), 126.48, 125.54 (q,  $J = 3.8$  Hz), 124.21 (q,  $J = 271.1$  Hz), 119.40.  $^{19}\text{F}$  NMR (376 MHz,  $\text{CDCl}_3$ )  $\delta$  -62.50.

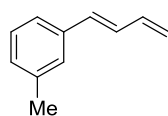

**(E)-1-(buta-1,3-dien-1-yl)-3-methylbenzene (1j)**<sup>5</sup>: Prepared according to the general procedure, 92% yield, yellow oil.  $^1\text{H}$  NMR (400 MHz,  $\text{CDCl}_3$ )  $\delta$  7.23 – 7.17 (m, 3H), 7.05 – 7.02 (m, 1H), 6.77 (dd,  $J = 15.6, 10.5$  Hz, 1H), 6.55 – 6.45 (m, 2H), 5.34 – 5.29 (m, 1H), 5.17 – 5.14 (m, 1H), 2.34 (s, 3H).  $^{13}\text{C}$  NMR (100 MHz,  $\text{CDCl}_3$ )  $\delta$  138.14, 137.27, 137.07, 132.99, 129.46, 128.52, 128.48, 127.16, 123.65, 117.42, 21.42.

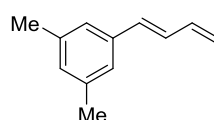

**(E)-1-(buta-1,3-dien-1-yl)-3,5-dimethylbenzene (1k)**<sup>1</sup>: Prepared according to the general procedure, 83% yield, yellow oil.  $^1\text{H}$  NMR (400 MHz,  $\text{CDCl}_3$ )  $\delta$  7.02 (s, 2H), 6.86 (s, 1H), 6.79 – 6.72 (m, 1H), 6.53 – 6.42 (m, 2H), 5.32 – 5.27 (m, 1H), 5.15 – 5.11 (m, 1H), 2.23 (s, 6H).  $^{13}\text{C}$  NMR (100 MHz,  $\text{CDCl}_3$ )  $\delta$  138.04, 137.37, 137.05, 133.12, 129.47, 129.31, 124.39, 117.22, 21.30.

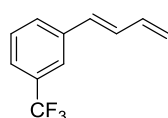

**(E)-1-(buta-1,3-dien-1-yl)-3-(trifluoromethyl)benzene (1l)**<sup>4</sup>: Prepared according to the general procedure, 51% yield, yellow oil.  $^1\text{H}$  NMR (400 MHz,  $\text{CDCl}_3$ )  $\delta$  7.63 (d,  $J = 1.4$  Hz, 1H), 7.54 (d,  $J = 7.7$  Hz, 1H), 7.47 – 7.38 (m, 2H), 6.83 (dd,  $J = 15.7, 10.5$  Hz, 1H), 6.59 – 6.45 (m, 2H), 5.42 – 5.37 (m, 1H), 5.26 –

5.23 (m, 1H).  $^{13}\text{C}$  NMR (100 MHz,  $\text{CDCl}_3$ )  $\delta$  137.91, 136.63, 131.33, 131.16, 131.05 (q,  $J = 31.9$  Hz), 129.46, 129.03, 124.12 (q,  $J = 270.7$ ), 124.04 (q,  $J = 3.9$  Hz), 122.97 (q,  $J = 3.9$  Hz), 119.08.  $^{19}\text{F}$  NMR (376 MHz,  $\text{CDCl}_3$ )  $\delta$  -62.84.

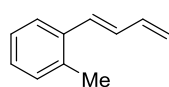

**(E)-1-(buta-1,3-dien-1-yl)-2-methylbenzene (1m)**<sup>5</sup>: Prepared according to the general procedure, 99% yield, yellow oil.  $^1\text{H}$  NMR (400 MHz,  $\text{CDCl}_3$ )  $\delta$  7.50 – 7.46 (m, 1H), 7.17 – 7.10 (m, 3H), 6.79 – 6.64 (m, 2H), 6.52 (dt,  $J = 16.8$ , 10.0 Hz, 1H), 5.31 (dd,  $J = 16.8$ , 1.5 Hz, 1H), 5.15 (dd,  $J = 10.0$ , 1.5 Hz, 1H), 2.33 (s, 3H).  $^{13}\text{C}$  NMR (100 MHz,  $\text{CDCl}_3$ )  $\delta$  137.59, 136.06, 135.70, 130.84, 130.58, 130.48, 127.61, 126.19, 125.26, 117.54, 19.89.

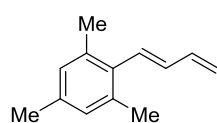

**(E)-2-(buta-1,3-dien-1-yl)-1,3,5-trimethylbenzene (1n)**<sup>6</sup>: Prepared according to the general procedure, 75% yield, yellow oil.  $^1\text{H}$  NMR (400 MHz,  $\text{CDCl}_3$ )  $\delta$  6.85 (s, 2H), 6.56 (d,  $J = 16.0$  Hz, 1H), 6.27 (dd,  $J = 16.0$ , 10.3 Hz, 1H), 6.52 (dt,  $J = 17.0$ , 10.2 Hz, 1H), 5.23 (d,  $J = 16.9$  Hz, 1H), 5.12 (d,  $J = 10.0$  Hz, 1H), 2.28 (s, 6H), 2.26 (s, 3H).  $^{13}\text{C}$  NMR (100 MHz,  $\text{CDCl}_3$ )  $\delta$  137.74, 136.33, 136.06, 134.75, 133.60, 131.06, 128.77, 116.60, 21.08, 21.00.

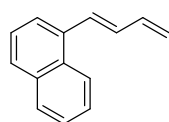

**(E)-1-(buta-1,3-dien-1-yl)naphthalene (1o)**<sup>1</sup>: Prepared according to the general procedure, 50% yield, yellow oil.  $^1\text{H}$  NMR (400 MHz,  $\text{CDCl}_3$ )  $\delta$  8.12 (d,  $J = 8.1$  Hz, 1H), 7.82 (dd,  $J = 7.5$ , 1.9 Hz, 1H), 7.75 (d,  $J = 8.2$  Hz, 1H), 7.65 (d,  $J = 7.2$  Hz, 1H), 7.52 – 7.40 (m, 3H), 7.33 (d,  $J = 15.3$  Hz, 1H), 6.84 (dd,  $J = 15.3$ , 10.6 Hz, 1H), 6.65 (dt,  $J = 16.8$ , 10.2 Hz, 1H), 5.38 (d,  $J = 16.8$  Hz, 1H), 5.22 (d,  $J = 10.0$  Hz, 1H).  $^{13}\text{C}$  NMR (100 MHz,  $\text{CDCl}_3$ )  $\delta$  137.47, 134.54, 133.76, 132.50, 131.21, 129.66, 128.64, 128.07, 126.10, 125.82, 125.64, 123.65, 123.44, 117.99.

Substrates **1p-1r** were synthesized according to the following procedures.<sup>1</sup>

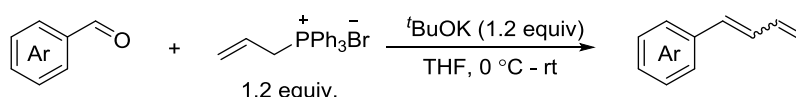

To a flame-dried round-bottom flask, allyltriphenylphosphonium bromide (6.0 mmol) in THF (40 mL) was added potassium *tert*-butoxide (6.0 mmol) at 0 °C under  $\text{N}_2$ . After stirring for 20 min, an aldehyde (5.0 mmol) was added. The reaction mixture was then warmed to room temperature and stirred for another 10-18 hours. After the starting material was consumed completely which was detected by TLC, the reaction mixture was quenched with sat.  $\text{NH}_4\text{Cl}$  aq. (15 mL) and extracted with diethyl ether (20 mL  $\times$  3). The combined organic layers were dried over  $\text{MgSO}_4$ , concentrated in vacuo and purified by flash chromatography on silica gel with *n*-hexane to afford the diene products **1p-1r**.

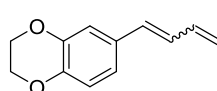

**6-(buta-1,3-dien-1-yl)-2,3-dihydrobenzo[b][1,4]dioxine (1p)**: Prepared according to the general procedure, 57% yield ( $Z/E = 1.7/1$ ), yellow oil.  $^1\text{H}$  NMR (400 MHz,  $\text{CDCl}_3$ )  $\delta$  6.94 – 6.78 (m,  $Z/E$ ), 6.63 (dd,  $J = 15.6$ , 10.3 Hz,

*E*), 6.51 – 6.41 (m, 1H, *E*), 6.32 (d, *J* = 11.5 Hz, 1H, *Z*), 6.16 (t, *J* = 11.3 Hz, 1H, *Z*), 5.33 (d, *J* = 16.8 Hz, 1H, *Z*), 5.30 – 5.24 (m, 1H, *E*), 5.19 (d, *J* = 10.2 Hz, 1H, *Z*), 5.11 (d, *J* = 10.0 Hz, 1H, *E*), 4.24 (s, 4H, *Z*), 4.23 (s, 4H, *E*). <sup>13</sup>C NMR (100 MHz, CDCl<sub>3</sub>) δ 143.57, 143.40, 143.18, 142.82, 137.25, 133.30, 132.31, 130.98, 129.75, 128.21, 122.50, 120.00, 119.18, 117.74, 117.38, 117.02, 116.77, 114.92, 64.47, 64.37. C signals could not be located likely due to overlapping. HRMS Calculated for C<sub>12</sub>H<sub>13</sub>O<sub>2</sub> [M+H]<sup>+</sup> 189.0910, found 189.0913.

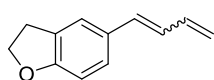

**5-(buta-1,3-dien-1-yl)-2,3-dihydrobenzofuran (1q):** Prepared according to the general procedure, 49% yield (*Z/E* = 1.7/1), yellow oil, <sup>1</sup>H NMR (400 MHz, CDCl<sub>3</sub>) δ 7.28 – 6.72 (m, *Z/E*), 6.64 (dd, *J* = 15.3, 10.6 Hz, 1H, *E*), 6.53 – 6.42 (m, 2H, *E*), 6.38 (d, *J* = 11.5 Hz, 1H, *Z*), 6.19 – 6.12 (m, 1H, *Z*), 5.36 – 5.31 (m, 1H, *Z*), 5.28 – 5.23 (m, 1H, *E*), 5.20 – 5.16 (m, 1H, *Z*), 5.10 – 5.07 (m, 1H, *E*), 4.58 (t, *J* = 8.7, 2H, *Z*), 4.57 (t, *J* = 8.7, 2H, *E*), 3.20 (t, *J* = 8.7, 2H, *Z*), 3.18 (t, *J* = 8.7, 2H, *E*). <sup>13</sup>C NMR (100 MHz, CDCl<sub>3</sub>) δ 159.99, 159.31, 137.45, 133.42, 132.85, 130.39, 130.01, 129.19, 128.96, 127.54, 127.09, 127.05, 125.58, 122.63, 118.70, 116.10, 109.34, 109.01, 71.40, 29.65. C signals could not be located likely due to overlapping. HRMS Calculated for C<sub>12</sub>H<sub>13</sub>O [M+H]<sup>+</sup> 173.0961, found 173.0962.

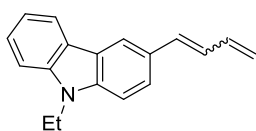

**3-(buta-1,3-dien-1-yl)-9-ethyl-9H-carbazole (1r):** Prepared according to the general procedure, 51% yield (*Z/E* = 2.5/1), yellow solid, melting point: 85 – 87 °C. <sup>1</sup>H NMR (400 MHz, CDCl<sub>3</sub>) δ 8.12 – 8.07 (m, 2H, *Z/E*), 7.58 – 7.33 (m, 4H, *Z/E*), 7.26 – 7.21 (m, 1H, *Z/E*), 7.05 (dt, *J* = 16.9, 10.7 Hz, 1H, *Z*), 6.89 – 6.74 (m, 2H, *E*), 6.66 (d, *J* = 11.4 Hz, 1H, *Z*), 6.57 (dt, *J* = 16.7, 9.9 Hz, 1H, *E*), 6.28 (t, *J* = 11.3 Hz, 1H, *Z*), 5.40 (d, *J* = 16.9 Hz, 1H, *Z*), 5.32 (d, *J* = 17.1 Hz, 1H, *E*), 5.23 (d, *J* = 10.1 Hz, 1H, *Z*), 5.13 (d, *J* = 10.0 Hz, 1H, *E*), 4.40 – 4.32 (m, 2H, *Z/E*), 1.44 (td, *J* = 7.2, 3.4 Hz, 3H, *Z/E*). <sup>13</sup>C NMR (100 MHz, CDCl<sub>3</sub>) δ 140.38, 140.34, 139.76, 139.14, 137.73, 133.99, 133.80, 131.43, 129.00, 128.39, 128.35, 127.17, 125.84, 124.43, 123.29, 122.98, 121.00, 120.53, 119.06, 119.01, 118.74, 115.91, 108.66, 108.63, 108.19, 37.64, 13.88. C signals could not be located likely due to overlapping. HRMS Calculated for C<sub>18</sub>H<sub>18</sub>N [M+H]<sup>+</sup> 248.1434, found 248.1433.

Substrates **2b-2d** were synthesized according to reported procedures.<sup>7</sup>

### 3. Screening of reaction conditions

**Table S1. Screening of the conditions for 3a<sup>a</sup>**

| Entry | Ligand (x mol%)       | Additive (2.0 equiv) | Solvent | T (°C) | Yield(%)<br><i>b</i> |
|-------|-----------------------|----------------------|---------|--------|----------------------|
| 1     | PPh <sub>3</sub> (10) | -                    | MeOH    | 80     | 50                   |

|                 |                                       |      |                   |     |                      |
|-----------------|---------------------------------------|------|-------------------|-----|----------------------|
| 2               | PPh <sub>3</sub> (10)                 | -    | EtOH              | 80  | 58                   |
| 3               | PPh <sub>3</sub> (10)                 | -    | <sup>n</sup> PrOH | 80  | 51                   |
| 4               | PPh <sub>3</sub> (10)                 | -    | <sup>i</sup> PrOH | 80  | 55                   |
| 5               | PPh <sub>3</sub> (10)                 | -    | <sup>t</sup> BuOH | 80  | 45                   |
| 6               | PCy <sub>3</sub> (10)                 | -    | EtOH              | 80  | 22                   |
| 7               | P( <sup>t</sup> Bu) <sub>3</sub> (10) | -    | EtOH              | 80  | trace                |
| 8               | P( <sup>n</sup> Bu) <sub>3</sub> (10) | -    | EtOH              | 80  | 83                   |
| 9               | dppp (5)                              | -    | EtOH              | 80  | 2                    |
| 10              | dppb (5)                              | -    | EtOH              | 80  | 50                   |
| 11              | dppf (5)                              | -    | EtOH              | 80  | 5                    |
| 12              | P( <sup>n</sup> Bu) <sub>3</sub> (10) | EtOH | THF               | 80  | 8                    |
| 13              | P( <sup>n</sup> Bu) <sub>3</sub> (10) | EtOH | Dioxane           | 80  | 28                   |
| 14              | P( <sup>n</sup> Bu) <sub>3</sub> (10) | EtOH | DMF               | 80  | 73                   |
| 15              | P( <sup>n</sup> Bu) <sub>3</sub> (10) | EtOH | MeCN              | 80  | 17                   |
| 16              | P( <sup>n</sup> Bu) <sub>3</sub> (10) | EtOH | DME               | 80  | 23                   |
| 17              | P( <sup>n</sup> Bu) <sub>3</sub> (10) | -    | EtOH              | 60  | 42                   |
| 18              | P( <sup>n</sup> Bu) <sub>3</sub> (10) | -    | EtOH              | 100 | 74                   |
| 19 <sup>c</sup> | P( <sup>n</sup> Bu) <sub>3</sub> (10) | -    | EtOH              | 80  | 93 (85) <sup>e</sup> |
| 20 <sup>d</sup> | P( <sup>n</sup> Bu) <sub>3</sub> (10) | -    | EtOH              | 80  | 75                   |
| 21 <sup>c</sup> | P( <sup>n</sup> Bu) <sub>3</sub> (10) | -    | MeOH              | 80  | 71                   |
| 22 <sup>c</sup> | P( <sup>n</sup> Bu) <sub>3</sub> (10) | -    | <sup>i</sup> PrOH | 80  | 56                   |
| 23 <sup>c</sup> | P( <sup>n</sup> Bu) <sub>3</sub> (10) | -    | <sup>t</sup> BuOH | 80  | 32                   |

<sup>a</sup>Reaction conditions: **1a** (0.20 mmol), **2a** (0.40 mmol), Ni(COD)<sub>2</sub> (5 mol%), ligand (5 -10 mol%), additive (2.0 equiv), solvent (0.5 mL), 80 °C, 18 h. <sup>b</sup>Determined by GC-FID using 1,3,5-trimethoxybenzene as internal standard. <sup>c</sup>0.25 mL EtOH. <sup>d</sup>1.0 mL EtOH. <sup>e</sup>Isolated yield.

#### 4. Typical procedure for nickel-catalyzed allyl-allyl coupling reaction

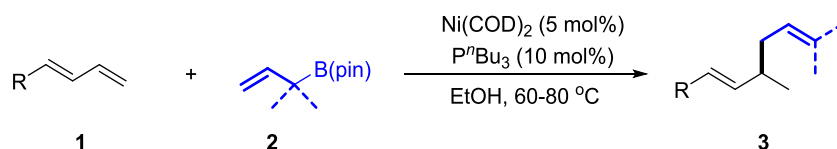

In glove box, a sealed tube was charged with Ni(COD)<sub>2</sub> (0.01 mmol, 5 mol%), P<sup>n</sup>Bu<sub>3</sub> (0.02 mmol, 10 mol%) and EtOH (0.25 mL) at room temperature. After stirring for 20 min, 1,4-diene **1** (0.20 mmol, 1.0 equiv) and allylboronate **2** (0.40 mmol, 2.0 equiv) were added. Then the reaction tube was sealed with a teflon screw cap, removed from the glove box and stirred at 60-80 °C for 6-72 h. After cooling to room temperature, the reaction mixture was directly purified by column chromatography on silica gel using *n*-pentene or *n*-hexane to afford the corresponding product **3**.

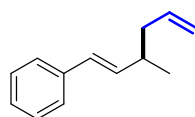

**(E)-(3-methylhexa-1,5-dien-1-yl)benzene (3a):** Prepared according to the general procedure, 80 °C, 18 h, 85% yield, known compound,<sup>8</sup> colorless oil,  $R_f = 0.85$  (Petroleum ether),  $^1\text{H NMR}$  (400 MHz,  $\text{CDCl}_3$ )  $\delta$  7.36 – 7.33 (m, 2H), 7.30 – 7.26 (m, 2H), 7.21 – 7.16 (m, 1H), 6.35 (d,  $J = 15.9$  Hz, 1H), 6.15 (dd,  $J = 15.9, 7.5$  Hz, 1H), 5.81 (ddt,  $J = 17.2, 10.2, 7.1$  Hz, 1H), 5.07 – 4.99 (m, 2H), 2.45 – 2.34 (m, 1H), 2.24 – 2.08 (m, 2H), 1.09 (d,  $J = 6.7$  Hz, 3H);  $^{13}\text{C NMR}$  (100 MHz,  $\text{CDCl}_3$ )  $\delta$  137.82, 136.98, 136.06, 128.48, 128.19, 126.87, 126.02, 115.98, 41.41, 36.93, 19.95.

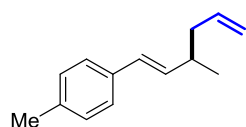

**(E)-1-methyl-4-(3-methylhexa-1,5-dien-1-yl)benzene (3b):** Prepared according to the general procedure, 80 °C, 22 h, 90% yield, known compound,<sup>9</sup> colorless oil,  $R_f = 0.82$  (Petroleum ether).  $^1\text{H NMR}$  (400 MHz,  $\text{CDCl}_3$ )  $\delta$  7.27 – 7.20 (m, 2H), 7.09 (d,  $J = 7.9$  Hz, 2H), 6.32 (dd,  $J = 15.9, 1.0$  Hz, 1H), 6.09 (dd,  $J = 15.9, 7.5$  Hz, 1H), 5.81 (ddt,  $J = 17.1, 10.2, 7.1$  Hz, 1H), 5.05 – 4.98 (m, 2H), 2.44 – 2.28 (m, 1H), 2.32 (s, 3H), 2.23 – 2.07 (m, 2H), 1.08 (d,  $J = 6.7$  Hz, 3H);  $^{13}\text{C NMR}$  (100 MHz,  $\text{CDCl}_3$ )  $\delta$  137.07, 136.56, 135.05, 135.04, 129.18, 128.00, 125.91, 115.91, 41.48, 36.92, 21.15, 19.99.

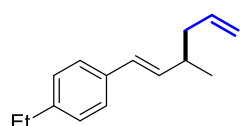

**(E)-1-ethyl-4-(3-methylhexa-1,5-dien-1-yl)benzene (3c):** Prepared according to the general procedure, 80 °C, 18 h, 83% yield, colorless oil,  $R_f = 0.85$  (Petroleum ether).  $^1\text{H NMR}$  (400 MHz,  $\text{CDCl}_3$ )  $\delta$  7.28 – 7.25 (m, 2H), 7.12 (d,  $J = 8.0$  Hz, 2H), 6.33 (dd,  $J = 16.0, 1.0$  Hz, 1H), 6.09 (dd,  $J = 15.9, 7.5$  Hz, 1H), 5.80 (ddt,  $J = 17.2, 10.2, 7.1$  Hz, 1H), 5.06 – 4.98 (m, 2H), 2.61 (q,  $J = 7.6$  Hz, 2H), 2.43 – 2.32 (m, 1H), 2.23 – 2.07 (m, 2H), 1.22 (t,  $J = 7.6$  Hz, 3H), 1.08 (d,  $J = 6.7$  Hz, 3H);  $^{13}\text{C NMR}$  (100 MHz,  $\text{CDCl}_3$ )  $\delta$  143.04, 137.07, 135.30, 135.14, 128.02, 128.00, 125.99, 115.90, 41.48, 36.94, 28.59, 20.01, 15.67. **HRMS** Calculated for  $\text{C}_{15}\text{H}_{20}$   $[\text{M}]^+$  200.1565, found 200.1560.

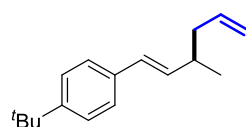

**(E)-1-(tert-butyl)-4-(3-methylhexa-1,5-dien-1-yl)benzene (3d):** Prepared according to the general procedure, 80 °C, 36 h, 85% yield, colorless oil,  $R_f = 0.72$  (Petroleum ether).  $^1\text{H NMR}$  (400 MHz,  $\text{CDCl}_3$ )  $\delta$  7.734 – 7.27 (m, 4H), 6.33 (d,  $J = 15.9$  Hz, 1H), 6.10 (dd,  $J = 15.9, 7.5$  Hz, 1H), 5.80 (ddt,  $J = 17.2, 10.1, 7.0$  Hz, 1H), 5.05 – 4.97 (m, 2H), 2.38 (hept,  $J = 7.1$  Hz, 1H), 2.23 – 2.07 (m, 2H), 1.30 (s, 9H), 1.08 (d,  $J = 6.7$  Hz, 3H);  $^{13}\text{C NMR}$  (100 MHz,  $\text{CDCl}_3$ )  $\delta$  149.91, 137.08, 135.33, 135.06, 127.91, 125.73, 125.41, 115.91, 41.50, 36.98, 34.52, 31.36, 20.05. **HRMS** Calculated for  $\text{C}_{17}\text{H}_{24}$   $[\text{M}]^+$  228.1878, found 228.1872.

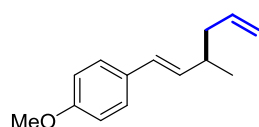

**(E)-1-methoxy-4-(3-methylhexa-1,5-dien-1-yl)benzene (3e):** Prepared according to the general procedure, 80 °C, 72 h, 62% yield, known compound,<sup>8</sup> colorless oil,  $R_f = 0.35$  (Petroleum ether).  $^1\text{H NMR}$  (400 MHz,  $\text{CDCl}_3$ )  $\delta$  7.28 (d,  $J = 8.7$  Hz, 2H), 6.83 (d,  $J = 8.6$  Hz, 2H), 6.30 (d,  $J = 15.9$  Hz, 1H), 6.00 (dd,  $J = 15.9, 7.5$  Hz, 1H), 5.81 (ddt,  $J = 17.2, 10.2, 7.0$  Hz, 1H), 5.05 – 4.98 (m, 2H), 3.79 (s, 3H), 2.37 (hept,  $J = 6.8$  Hz, 1H), 2.22 – 2.07 (m, 2H), 1.08 (d,  $J = 6.7$  Hz, 3H);  $^{13}\text{C NMR}$  (100 MHz,  $\text{CDCl}_3$ )  $\delta$  158.69, 137.11, 133.97, 130.65, 127.50, 127.08, 115.87, 113.91, 55.30, 41.52, 36.89, 20.04.

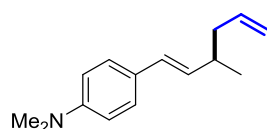

**(E)-N,N-dimethyl-4-(3-methylhexa-1,5-dien-1-yl)aniline (3f):**

Prepared according to the general procedure, 80 °C, 24 h, 33% yield, colorless oil,  $R_f = 0.75$  (PE/EA = 50:1).  $^1\text{H NMR}$  (400 MHz,  $\text{CDCl}_3$ )  $\delta$  7.24 (d,  $J = 9.0$  Hz, 2H), 6.67 (d,  $J = 8.9$  Hz, 2H), 6.27 (d,  $J = 15.9$  Hz, 1H), 5.94 (dd,  $J = 15.9, 7.5$  Hz, 1H), 5.81 (ddt,  $J = 17.1, 10.1, 7.1$  Hz, 1H), 5.05 – 4.97 (m, 2H), 2.93 (s, 6H), 2.42 – 2.29 (m, 1H), 2.22 – 2.05 (m, 2H), 1.07 (d,  $J = 6.7$  Hz, 3H);  $^{13}\text{C NMR}$  (100 MHz,  $\text{CDCl}_3$ )  $\delta$  149.75, 137.33, 132.04, 127.83, 126.82, 126.59, 115.69, 112.68, 41.69, 40.69, 36.93, 20.17. **HRMS** Calculated for  $\text{C}_{15}\text{H}_{22}\text{N}$   $[\text{M}+\text{H}]^+$  216.1747, found 216.1749.

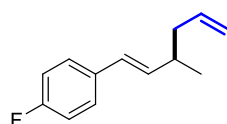

**(E)-1-fluoro-4-(3-methylhexa-1,5-dien-1-yl)benzene (3g):**

Prepared according to the general procedure, 80 °C, 18 h, 80% yield, known compound,<sup>8</sup> colorless oil,  $R_f = 0.80$  (Petroleum ether).  $^1\text{H NMR}$  (400 MHz,  $\text{CDCl}_3$ )  $\delta$  7.32 – 7.27 (m, 2H), 7.00 – 6.94 (m, 2H), 6.31 (dd,  $J = 15.9, 1.1$  Hz, 1H), 6.05 (dd,  $J = 15.9, 7.4$  Hz, 1H), 5.80 (ddt,  $J = 17.2, 10.2, 7.0$  Hz, 1H), 5.07 – 4.99 (m, 2H), 2.44 – 2.33 (m, 1H), 2.23 – 2.08 (m, 2H), 1.09 (d,  $J = 6.7$  Hz, 3H);  $^{13}\text{C NMR}$  (100 MHz,  $\text{CDCl}_3$ )  $\delta$  161.92 (d,  $J = 246.5$  Hz), 136.89, 135.79 (d,  $J = 2.3$  Hz), 133.94 (d,  $J = 3.3$  Hz), 127.40 (d,  $J = 8.0$  Hz), 127.04, 116.03, 115.29 (d,  $J = 21.5$  Hz), 41.37, 36.87, 19.92;  $^{19}\text{F NMR}$  (376 MHz,  $\text{CDCl}_3$ )  $\delta$  -115.78.

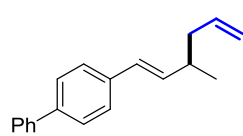

**(E)-4-(3-methylhexa-1,5-dien-1-yl)-1,1'-biphenyl (3h):**

Prepared according to the general procedure, 70 °C, 14 h, 87% yield, known compound,<sup>8</sup> colorless oil,  $R_f = 0.80$  (Petroleum ether).  $^1\text{H NMR}$  (400 MHz,  $\text{CDCl}_3$ )  $\delta$  7.58 (d,  $J = 7.9$  Hz, 2H), 7.53 (d,  $J = 8.0$  Hz, 2H), 7.44 – 7.40 (m, 4H), 7.34 – 7.30 (m, 1H), 6.39 (d,  $J = 15.9$  Hz, 1H), 6.19 (dd,  $J = 15.9, 7.4$  Hz, 1H), 5.82 (ddt,  $J = 17.1, 10.1, 7.1$  Hz, 1H), 5.08 – 5.00 (m, 2H), 2.42 (hept,  $J = 6.9$  Hz, 1H), 2.28 – 2.08 (m, 2H), 1.11 (d,  $J = 6.7$  Hz, 3H);  $^{13}\text{C NMR}$  (100 MHz,  $\text{CDCl}_3$ )  $\delta$  140.90, 139.67, 136.98, 136.90, 136.28, 128.78, 127.79, 127.22, 127.18, 126.93, 126.45, 116.05, 41.44, 37.03, 19.99.

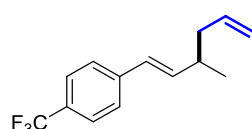

**(E)-1-(3-methylhexa-1,5-dien-1-yl)-4-(trifluoromethyl)benzene (3i):**

Prepared according to the general procedure, 70 °C, 6 h, 71% yield, known compound,<sup>8</sup> colorless oil,  $R_f = 0.75$  (Petroleum ether).  $^1\text{H NMR}$  (400 MHz,  $\text{CDCl}_3$ )  $\delta$  (d,  $J = 8.1$  Hz, 2H), 7.42 (d,  $J = 8.1$  Hz, 2H), 6.38 (d,  $J = 15.9$  Hz, 1H), 6.25 (dd,  $J = 16.0, 7.3$  Hz, 1H), 5.80 (ddt,  $J = 17.2, 10.2, 7.0$  Hz, 1H), 5.08 – 5.00 (m, 2H), 2.43 (hept,  $J = 6.9$  Hz, 1H), 2.18 (qt,  $J = 13.9, 6.9$  Hz, 2H), 1.11 (d,  $J = 6.7$  Hz, 3H);  $^{13}\text{C NMR}$  (100 MHz,  $\text{CDCl}_3$ )  $\delta$  141.29, 138.81, 136.61, 128.70 (q,  $J = 32.7$  Hz), 127.09, 126.12, 125.41 (q,  $J = 3.8$  Hz), 121.60 (q,  $J = 272.7$  Hz), 116.24, 41.19, 36.96, 19.74.  $^{19}\text{F NMR}$  (376 MHz,  $\text{CDCl}_3$ )  $\delta$  -62.40.

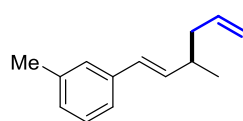

**(E)-1-methyl-3-(3-methylhexa-1,5-dien-1-yl)benzene (3j):**

Prepared according to the general procedure, 80 °C, 24 h, 93% yield, colorless oil,  $R_f = 0.75$  (Petroleum ether).  $^1\text{H NMR}$  (400 MHz,  $\text{CDCl}_3$ )  $\delta$  7.20 – 7.13 (m, 3H), 7.01 (d,  $J = 7.4$  Hz, 1H), 6.32 (d,  $J = 15.9$  Hz, 1H), 6.13 (dd,  $J = 15.9, 7.5$  Hz, 1H), 5.81 (ddt,  $J = 17.2, 10.1, 7.1$  Hz, 1H), 5.06 – 4.98 (m, 2H), 2.43 – 2.32 (m, 4H), 2.23 – 2.07 (m, 2H), 1.09 (d,  $J = 6.7$  Hz, 3H);  $^{13}\text{C NMR}$  (100 MHz,  $\text{CDCl}_3$ )  $\delta$  137.99, 137.76, 137.02,



135.86, 128.40, 128.26, 127.67, 126.73, 123.20, 115.95, 41.43, 36.97, 21.43, 19.99. **HRMS** Calculated for C<sub>14</sub>H<sub>18</sub> [M]<sup>+</sup> 186.1409, found 186.1405.

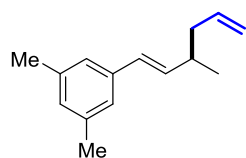

**(E)-1,3-dimethyl-5-(3-methylhexa-1,5-dien-1-yl)benzene (3k):** Prepared according to the general procedure, 80 °C, 18 h, 82% yield, known compound,<sup>8</sup> colorless oil, R<sub>f</sub> = 0.73 (Petroleum ether). **<sup>1</sup>H NMR** (400 MHz, CDCl<sub>3</sub>) δ 6.97 (s, 2H), 6.84 (s, 1H), 6.29 (d, *J* = 15.9 Hz, 1H), 6.11 (dd, *J* = 15.9, 7.5 Hz, 1H), 5.80 (ddt, *J* = 17.2, 10.2, 7.0 Hz, 1H), 5.06 – 4.98 (m, 2H), 2.37 (hept, *J* = 7.0 Hz, 1H), 2.29 (s, 6H), 2.23 – 2.07 (m, 2H), 1.08 (d, *J* = 6.7 Hz, 3H); **<sup>13</sup>C NMR** (100 MHz, CDCl<sub>3</sub>) δ 137.91, 137.73, 137.06, 135.68, 128.61, 128.31, 123.93, 115.91, 41.45, 37.00, 21.30, 20.02.

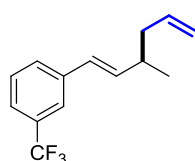

**(E)-1-(3-methylhexa-1,5-dien-1-yl)-3-(trifluoromethyl)benzene (3l):** Prepared according to the general procedure, 70 °C, 6 h, 86% yield, known compound,<sup>8</sup> colorless oil, R<sub>f</sub> = 0.60 (Petroleum ether). **<sup>1</sup>H NMR** (400 MHz, CDCl<sub>3</sub>) δ 7.58 (d, *J* = 2.1 Hz, 1H), 7.51 – 7.48 (m, 1H), 7.45 – 7.37 (m, 2H), 6.38 (dd, *J* = 15.9, 1.0 Hz, 1H), 6.22 (dd, *J* = 15.9, 7.4 Hz, 1H), 5.80 (ddt, *J* = 17.1, 10.1, 7.0 Hz, 1H), 5.08 – 5.00 (m, 2H), 2.42 (tdd, *J* = 13.6, 6.8, 1.1 Hz, 1H), 2.25 – 2.10 (m, 2H), 1.11 (d, *J* = 6.7 Hz, 3H); **<sup>13</sup>C NMR** (100 MHz, CDCl<sub>3</sub>) δ 138.56, 138.04, 136.66, 130.86 (q, *J* = 32.1 Hz), 129.17, 128.87, 127.03, 124.21 (q, *J* = 273.3 Hz), 123.39 (q, *J* = 3.8 Hz), 122.65 (q, *J* = 3.9 Hz), 116.21, 41.20, 36.95, 19.80. **<sup>9</sup>F NMR** (376 MHz, CDCl<sub>3</sub>) δ -62.75.

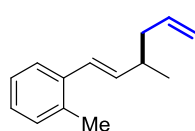

**(E)-1-methyl-2-(3-methylhexa-1,5-dien-1-yl)benzene (3m):** Prepared according to the general procedure, 80 °C, 18 h, 83% yield, colorless oil, R<sub>f</sub> = 0.78 (Petroleum ether). **<sup>1</sup>H NMR** (400 MHz, CDCl<sub>3</sub>) δ 7.40 (d, *J* = 6.9 Hz, 1H), 7.15 – 7.10 (m, 3H), 6.54 (d, *J* = 15.7 Hz, 1H), 5.99 (dd, *J* = 15.8, 7.6 Hz, 1H), 5.82 (ddt, *J* = 17.2, 10.2, 7.1 Hz, 1H), 5.09 – 4.97 (m, 2H), 2.42 (hept, *J* = 7.0 Hz, 1H), 2.32 (s, 3H), 2.23 – 2.10 (m, 2H), 1.10 (d, *J* = 6.7 Hz, 3H); **<sup>13</sup>C NMR** (100 MHz, CDCl<sub>3</sub>) δ 137.51, 137.04, 137.02, 135.02, 130.14, 126.83, 126.13, 126.01, 125.53, 115.96, 41.49, 37.24, 20.15, 19.87. **HRMS** Calculated for C<sub>14</sub>H<sub>18</sub> [M]<sup>+</sup> 186.1409, found 186.1403.

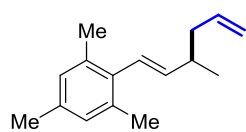

**(E)-1,3,5-trimethyl-2-(3-methylhexa-1,5-dien-1-yl)benzene (3n):** Prepared according to the general procedure, 60 °C, 30 h, 85% yield, colorless oil, R<sub>f</sub> = 0.75 (Petroleum ether). **<sup>1</sup>H NMR** (400 MHz, CDCl<sub>3</sub>) δ 6.91 (s, 2H), 6.30 (d, *J* = 16.2 Hz, 1H), 5.89 (ddt, *J* = 17.1, 10.1, 7.0 Hz, 1H), 5.59 (dd, *J* = 16.2, 7.7 Hz, 1H), 5.12 – 5.05 (m, 2H), 2.53 – 2.42 (m, 1H), 2.31 (s, 3H), 2.30 (s, 6H), 2.22 (tdt, *J* = 6.8, 2.8, 1.3 Hz, 2H), 1.16 (d, *J* = 6.8 Hz, 3H); **<sup>13</sup>C NMR** (100 MHz, CDCl<sub>3</sub>) δ 140.70, 137.24, 135.85, 135.63, 134.75, 128.41, 125.61, 115.89, 41.54, 37.63, 20.95, 20.93, 20.37. **HRMS** Calculated for C<sub>16</sub>H<sub>22</sub> [M]<sup>+</sup> 214.1722, found 214.1718.

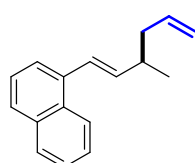

**(E)-1-(3-methylhexa-1,5-dien-1-yl)naphthalene (3o):** Prepared according to the general procedure, 70 °C, 12 h, 92% yield, colorless oil, R<sub>f</sub> = 0.70 (Petroleum ether). **<sup>1</sup>H NMR** (400 MHz, CDCl<sub>3</sub>) δ 8.12 – 8.09 (m, 1H), 7.81 (dd, *J* = 7.3, 2.0 Hz, 1H), 7.72 (d, *J* = 8.2 Hz, 1H), 7.55 – 7.38 (m, 4H), 7.07 (d,

$J = 15.6$  Hz, 1H), 6.14 (dd,  $J = 15.6, 7.5$  Hz, 1H), 5.87 (ddt,  $J = 17.2, 10.2, 7.1$  Hz, 1H), 5.11 – 5.03 (m, 2H), 2.52 (hept,  $J = 6.9$  Hz, 1H), 2.23 (qt,  $J = 14.0, 7.0$  Hz, 2H), 1.17 (d,  $J = 6.7$  Hz, 3H);  $^{13}\text{C NMR}$  (100 MHz,  $\text{CDCl}_3$ )  $\delta$  139.46, 137.05, 135.76, 133.67, 131.25, 128.50, 127.33, 125.82, 125.69, 125.67, 125.52, 124.03, 123.64, 116.13, 41.51, 37.35, 20.12. **HRMS** Calculated for  $\text{C}_{17}\text{H}_{18}$   $[\text{M}]^+$  222.1409, found 222.1404.

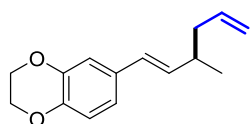

**(E)-6-(3-methylhexa-1,5-dien-1-yl)-2,3-dihydrobenzo[b][1,4]dioxine**

**(3p):** Prepared according to the general procedure, 60 °C, 72 h, 60% yield, colorless oil,  $R_f = 0.50$  (PE/EA = 20:1).  $^1\text{H NMR}$  (400 MHz,  $\text{CDCl}_3$ )  $\delta$  6.87 (d,  $J = 2.1$  Hz, 1H), 6.83 (dd,  $J = 8.3, 2.1$  Hz, 1H), 6.78 (d,  $J = 8.3$  Hz, 1H), 6.23 (dd,  $J = 15.8, 1.1$  Hz, 1H), 5.99 (dd,  $J = 15.8, 7.5$  Hz, 1H), 5.79 (ddt,  $J = 17.1, 10.2, 7.1$  Hz, 1H), 4.98 – 5.04 (m, 2H), 4.24 (s, 4H), 2.39 – 2.33 (m, 1H), 2.19 – 2.08 (m, 2H), 1.07 (d,  $J = 6.8$  Hz, 3H);  $^{13}\text{C NMR}$  (100 MHz,  $\text{CDCl}_3$ )  $\delta$  143.46, 142.67, 137.05, 134.57, 131.71, 127.40, 119.39, 117.18, 115.90, 114.46, 64.44, 64.40, 41.47, 36.83, 20.00. **HRMS** Calculated for  $\text{C}_{15}\text{H}_{19}\text{O}_2$   $[\text{M}+\text{H}]^+$  231.1380, found 231.1390.

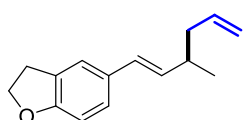

**(E)-5-(3-methylhexa-1,5-dien-1-yl)-2,3-dihydrobenzofuran** **(3q):**

Prepared according to the general procedure, 70 °C, 72 h, 23% yield, colorless oil,  $R_f = 0.45$  (PE/EA = 20:1).  $^1\text{H NMR}$  (400 MHz,  $\text{CDCl}_3$ )  $\delta$  7.23 (s, 1H), 7.08 (d,  $J = 8.3$  Hz, 1H), 6.71 (d,  $J = 8.4$  Hz, 1H), 6.29 (d,  $J = 15.9$  Hz, 1H), 5.96 (dd,  $J = 15.9, 7.5$  Hz, 1H), 5.81 (ddt,  $J = 17.2, 10.2, 7.0$  Hz, 1H), 5.05 – 4.97 (m, 2H), 4.56 (q,  $J = 8.6$  Hz, 2H), 3.18 (q,  $J = 8.7$  Hz, 2H), 2.43 – 2.28 (m, 1H), 2.22 – 2.06 (m, 2H), 1.07 (d,  $J = 6.7$  Hz, 3H);  $^{13}\text{C NMR}$  (100 MHz,  $\text{CDCl}_3$ )  $\delta$  159.27, 137.14, 133.35, 130.70, 127.89, 127.28, 126.29, 122.17, 115.83, 109.11, 71.33, 41.57, 36.89, 29.68, 20.11. **HRMS** Calculated for  $\text{C}_{15}\text{H}_{19}\text{O}$   $[\text{M}+\text{H}]^+$  215.1430, found 215.1428.

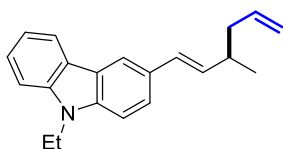

**(E)-9-ethyl-3-(3-methylhexa-1,5-dien-1-yl)-9H-carbazole** **(3r):**

Prepared according to the general procedure, 60 °C, 72 h, 21% yield, known compound,<sup>8</sup> colorless oil,  $R_f = 0.55$  (PE/EA = 50:1).  $^1\text{H NMR}$  (400 MHz,  $\text{CDCl}_3$ )  $\delta$  8.17 – 8.01 (m, 2H), 7.51 (dd,  $J = 8.4, 1.7$  Hz, 1H), 7.46 – 7.44 (m, 1H), 7.40 – 7.37 (m, 1H), 7.33 (d,  $J = 8.4$  Hz, 1H), 7.23 – 7.20 (m, 1H), 6.55 (d,  $J = 15.7$  Hz, 1H), 6.17 (dd,  $J = 15.8, 7.5$  Hz, 1H), 5.87 (ddt,  $J = 17.1, 10.2, 7.0$  Hz, 1H), 5.11 – 4.99 (m, 2H), 4.35 (q,  $J = 7.2$  Hz, 2H), 2.48 – 2.42 (m, 1H), 2.28 – 2.23 (m, 1H), 2.20 – 2.14 (m, 1H), 1.42 (t,  $J = 7.2$  Hz, 3H), 1.14 (d,  $J = 6.7$  Hz, 3H);  $^{13}\text{C NMR}$  (100 MHz,  $\text{CDCl}_3$ )  $\delta$  140.29, 139.29, 137.29, 133.43, 129.04, 128.78, 125.61, 123.99, 123.16, 123.02, 120.44, 118.77, 118.00, 115.84, 108.51, 108.40, 41.67, 37.07, 29.72, 20.19, 13.83.

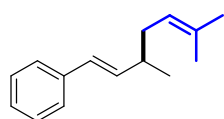

**(E)-(3,6-dimethylhepta-1,5-dien-1-yl)benzene** **(3s):** Prepared according to

the general procedure, 80 °C, 18 h, 43% yield, colorless oil,  $R_f = 0.74$  (Petroleum ether).  $^1\text{H NMR}$  (400 MHz,  $\text{CDCl}_3$ )  $\delta$  7.35 (d,  $J = 8.5$  Hz, 2H), 7.29 (t,  $J = 7.5$  Hz, 2H), 7.18 (t,  $J = 7.2$  Hz, 1H), 6.34 (d,  $J = 15.9$  Hz, 1H), 6.16 (dd,  $J = 15.9, 7.4$  Hz, 1H), 5.16 (t,  $J = 7.1$  Hz, 1H), 2.38 – 2.28 (m, 1H), 2.16 – 2.02 (m, 2H), 1.70 (s, 3H), 1.61 (s, 3H), 1.08 (d,  $J = 6.7$  Hz, 3H);  $^{13}\text{C NMR}$  (100 MHz,  $\text{CDCl}_3$ )  $\delta$  137.99, 136.64, 132.46, 128.46, 127.82, 126.75, 125.98, 122.60, 37.59, 35.47, 25.83, 19.95, 17.93. **HRMS**

Calculated for C<sub>15</sub>H<sub>20</sub> [M]<sup>+</sup> 200.1565, found 200.1561.

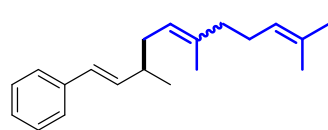

**((1E)-3,6,10-trimethylundeca-1,5,9-trien-1-yl)benzene (3t):**

Prepared according to the general procedure, 80 °C, 18 h, 42% yield, Z/E mixture, colorless oil, R<sub>f</sub> = 0.75 (Petroleum ether). <sup>1</sup>H

**NMR** (400 MHz, CDCl<sub>3</sub>) δ 7.34 (d, *J* = 8.3 Hz, 2H), 7.28 (t, *J* = 7.5 Hz, 2H), 7.18 (t, *J* = 7.2 Hz, 1H), 6.34 (d, *J* = 15.9 Hz, 1H), 6.16 (ddd, *J* = 15.9, 7.4, 2.1 Hz, 1H), 5.18 (t, *J* = 6.6 Hz, 1H), 5.09 (t, *J* = 6.9 Hz, 1H), 2.40 – 2.27 (m, 1H), 2.16 – 1.98 (m, 6H), 1.71 – 1.65 (m, 4H), 1.60 (d, *J* = 5.9 Hz, 5H), 1.08 (d, *J* = 6.7 Hz, 3H); <sup>13</sup>C **NMR** (100 MHz, CDCl<sub>3</sub>) δ 138.00, 136.64, 136.17, 136.09, 131.55, 131.30, 128.45, 127.87, 127.79, 126.76, 126.74, 125.99, 125.98, 124.37, 123.31, 122.58, 39.86, 37.65, 37.59, 35.35, 35.18, 32.12, 26.74, 26.58, 25.73, 25.71, 23.50, 20.03, 19.84, 17.70, 17.65, 16.20. **HRMS** Calculated for C<sub>20</sub>H<sub>28</sub> [M]<sup>+</sup> 268.2191, found 268.2186.

**Unsuccessful substrates:**

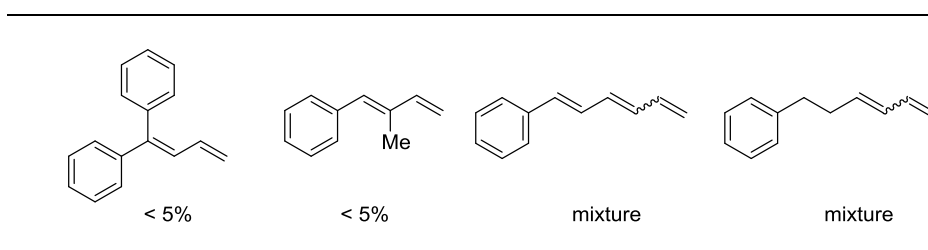

**5. Scale-up synthesis and further transformation of 3a**

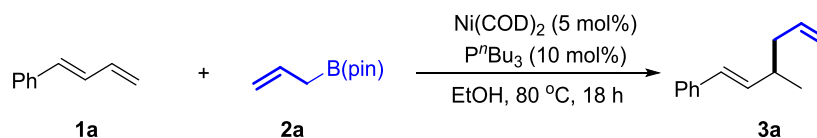

In glove box, a sealed tube was charged with Ni(COD)<sub>2</sub> (0.25 mmol, 5 mol%), P<sup>*t*</sup>Bu<sub>3</sub> (0.50 mmol, 10 mol%) and EtOH (6.25 mL) at room temperature. After stirring for 20 min, 1,4-diene **1a** (5.0 mmol, 1.0 equiv) and allylboronate **2a** (10.0 mmol, 2.0 equiv) were added. Then the reaction tube was sealed with a Teflon screw cap, removed from the glove box and stirred at 80 °C for 18 h. After cooling to room temperature, the reaction mixture was directly purified by column chromatography on silica gel using *n*-pentene to afford product **3a** as colorless oil (762 mg, 88%).

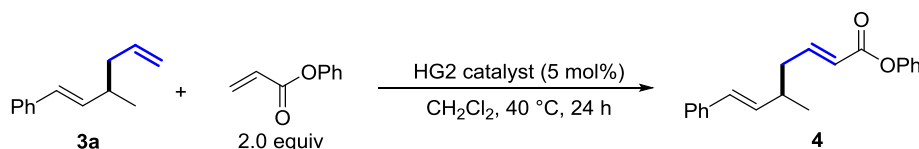

**phenyl (2E,6E)-5-methyl-7-phenylhepta-2,6-dienoate (4).** In a glove box, Hoveyda-Grubbs Catalyst 2nd (6.3 mg, 0.01 mmol), phenyl acrylate (40.0 mg, 0.4 mmol) were weighed out into a flame-dried flask equipped with a magnetic stirring bar flame. Then, a solution of **3a** (34.5 mg, 0.2 mmol) dissolved in DCM (3.0 mL) was added through a syringe and the resulting mixture was

allowed to stir at 40 °C for 24 h. The mixture was allowed to cool to rt and the volatiles were removed in vacuo and the crude product was purified by flash column chromatography (using 2% EA/PE) to give the corresponding product **4** as colorless oil (21.4 mg, 37%). <sup>1</sup>H NMR (400 MHz, CDCl<sub>3</sub>) δ 7.39 – 7.35 (m, 4H), 7.30 (t, *J* = 7.5 Hz, 2H), 7.23 – 7.20 (m, 2H), 7.18 – 7.10 (m, 3H), 6.42 (d, *J* = 15.9 Hz, 1H), 6.15 (dd, *J* = 15.8, 7.3 Hz, 1H), 6.06 (d, *J* = 15.6 Hz, 1H), 2.58 (hept, *J* = 6.2 Hz, 1H), 2.48 – 2.32 (m, 2H), 1.17 (d, *J* = 6.6 Hz, 3H). <sup>13</sup>C NMR (100 MHz, CDCl<sub>3</sub>) δ 164.78, 150.74, 149.62, 137.38, 134.71, 129.36, 129.10, 128.54, 127.17, 126.12, 125.68, 122.04, 121.64, 39.87, 36.42, 20.27. HRMS Calculated for C<sub>20</sub>H<sub>21</sub>O<sub>2</sub> [M+H]<sup>+</sup> 293.1536, found 293.1536.

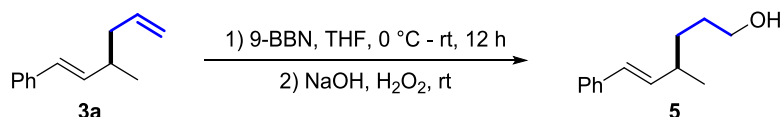

**(E)-4-methyl-6-phenylhex-5-en-1-ol (5)**. To a flame-dried flask equipped with a magnetic stirring bar were added **3a** (34.5 mg, 0.2 mmol) and dry THF (2.0 mL) and then a solution of 9-BBN (0.5 M solution in THF, 0.4 mL) at 0 °C under N<sub>2</sub>. Then the reaction flask was stirred for 12 h at rt. NaOH (80 mg) and H<sub>2</sub>O<sub>2</sub> (30%, 1.2 mL) were then added to the reaction. After 3 h, the reaction mixture was quenched with sat. NH<sub>4</sub>Cl aq. (15 mL) and extracted with diethyl ether (20 mL × 3). The combined organic layers were dried over MgSO<sub>4</sub>, concentrated in vacuo and purified by flash chromatography on silica gel (using 5% EtOAc/PE) to afford **5** as colorless oil (31.0 mg, 82%). <sup>1</sup>H NMR (400 MHz, CDCl<sub>3</sub>) δ 7.34 (d, *J* = 7.4 Hz, 2H), 7.29 (t, *J* = 7.5 Hz, 2H), 7.21 – 7.16 (m, 1H), 6.35 (d, *J* = 15.9 Hz, 1H), 6.08 (dd, *J* = 15.9, 8.0 Hz, 1H), 3.64 (t, *J* = 6.5 Hz, 2H), 2.31 (hept, *J* = 6.9 Hz, 1H), 1.64– 1.56 (m, 2H), 1.50 – 1.41 (m, 2H), 1.37 (s, 1H), 1.10 (d, *J* = 6.7 Hz, 3H). <sup>13</sup>C NMR (100 MHz, CDCl<sub>3</sub>) δ 137.76, 136.40, 128.49, 128.43, 126.88, 125.98, 63.11, 37.18, 33.09, 30.67, 20.77. HRMS Calculated for C<sub>13</sub>H<sub>19</sub>O [M+H]<sup>+</sup> 191.1430, found 191.1425.

## 6. Control and deuterium labeling experiments

Deuterium-labeling study

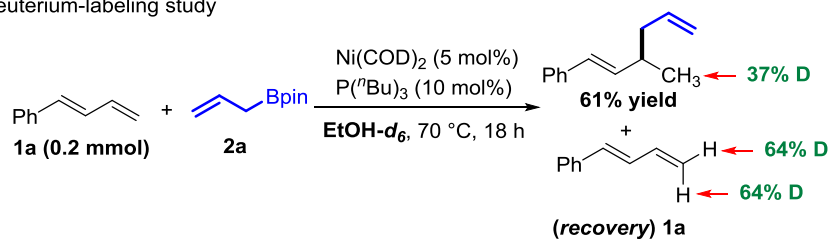

In glove box, a sealed tube was charged with Ni(COD)<sub>2</sub> (0.01 mmol, 5 mol%), P<sup>*t*</sup>Bu<sub>3</sub> (0.02 mmol, 10 mol%) and EtOH-*d*<sub>6</sub> (0.25 mL) at room temperature. After stirring for 20 min, 1,4-diene **1a** (0.2 mmol, 1.0 equiv) and allylboronate **2a** (0.4 mmol, 2.0 equiv) were added. Then the reaction tube was sealed with a Teflon screw cap, removed from the glove box and stirred at 70 °C for 18 h. After cooling to room temperature, the reaction mixture was directly purified by column chromatography on silica gel using *n*-pentene to afford the product **3a-d<sub>n</sub>**. Accompanied by small amount of recovery diene **1a**.

Controlled experiments

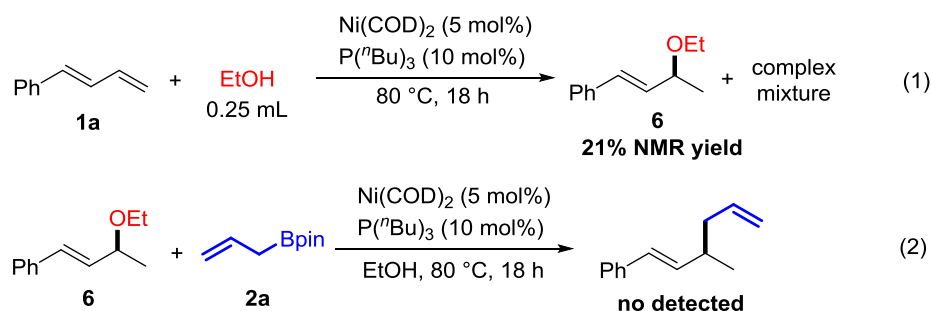

(1) In glove box, a sealed tube was charged with Ni(COD)<sub>2</sub> (0.01 mmol, 5 mol%), P<sup>n</sup>Bu<sub>3</sub> (0.02 mmol, 10 mol%) and EtOH (0.25 mL) at room temperature. After stirring for 20 min, 1,4-diene **1a** (0.2 mmol, 1.0 equiv) were added. Then the reaction tube was sealed with a Teflon screw cap, removed from the glove box and stirred at 80 °C for 18 h. The mixture was then allowed to cool to room temperature and 1,3,5-trimethoxybenzene was added as the internal standard to determine the NMR yield.

(2) In glove box, a sealed tube was charged with Ni(COD)<sub>2</sub> (0.01 mmol, 5 mol%), P<sup>n</sup>Bu<sub>3</sub> (0.02 mmol, 10 mol%) and EtOH-*d*<sub>6</sub> (0.25 mL) at room temperature. After stirring for 20 min, **6** (0.2 mmol, 1.0 equiv) and allylboronate **2a** (0.4 mmol, 2.0 equiv) were added. Then the reaction tube was sealed with a Teflon screw cap, removed from the glove box and stirred at 80 °C. The reaction mixture was monitored by TLC and GC-MS and no product were detected after 18 hours.

## 7. References

1. Qiao, C.; Chen, A.; Gao, B.; Liu, Y.; Huang, H. *Chin. J. Chem.* **2018**, *36*, 929.
2. Khan, F. A.; Budanur, B. M. *Tetrahedron*, **2015**, *71*, 27020.
3. Davenport, E.; Fernandez, E. *Chem. Commun.* **2018**, *54*, 10104.
4. Nguyen, V. T.; Dang, H. T.; Pham, H. H.; Nguyen, V. D.; Flores-Hansen, C.; Arman, H. D.; Larionov, O. V. *J. Am. Chem. Soc.* **2018**, *140*, 8434.
5. Adamson, N. J.; Hull, E.; Malcolmson, S. J. *J. Am. Chem. Soc.* **2017**, *139*, 7180.
6. Heimgartner, H.; Ulrich, L.; Hansen, H.-J.; Schmid, H. *Helv. Chim. Acta*, **1971**, *54*, 2313.
7. Ardolino, M. J.; Morken, J. P. *J. Am. Chem. Soc.* **2014**, *136*, 7092.
8. Marcum, J. S.; Cervarich, T. N.; Manan, R. S.; Roberts, C. C.; Meek, S. J. *ACS Catal.* **2019**, *9*, 5881.
9. Chatterjee, P. N.; Roy, S. *Tetrahedron* **2012**, *68*, 3776.

## 8. Copy of NMR for products

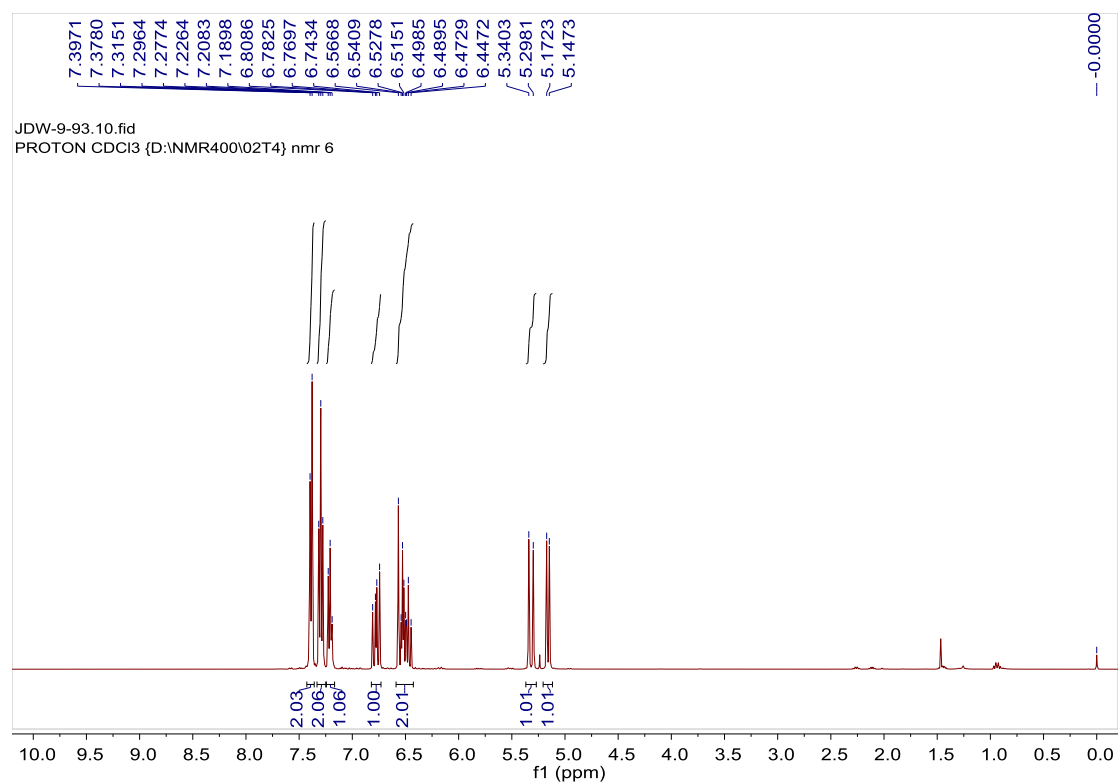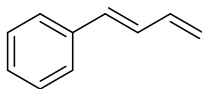

**1a** <sup>1</sup>H NMR (400 MHz, CDCl<sub>3</sub>)

<sup>13</sup>C NMR (100 MHz, CDCl<sub>3</sub>)

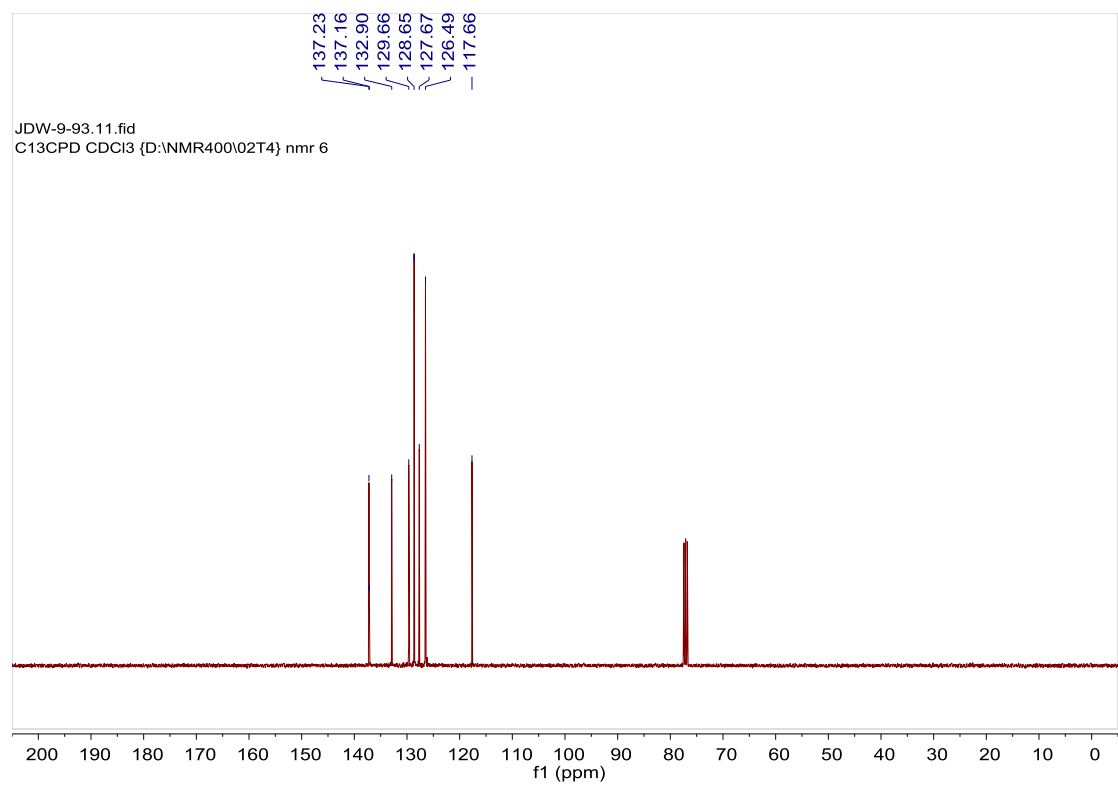

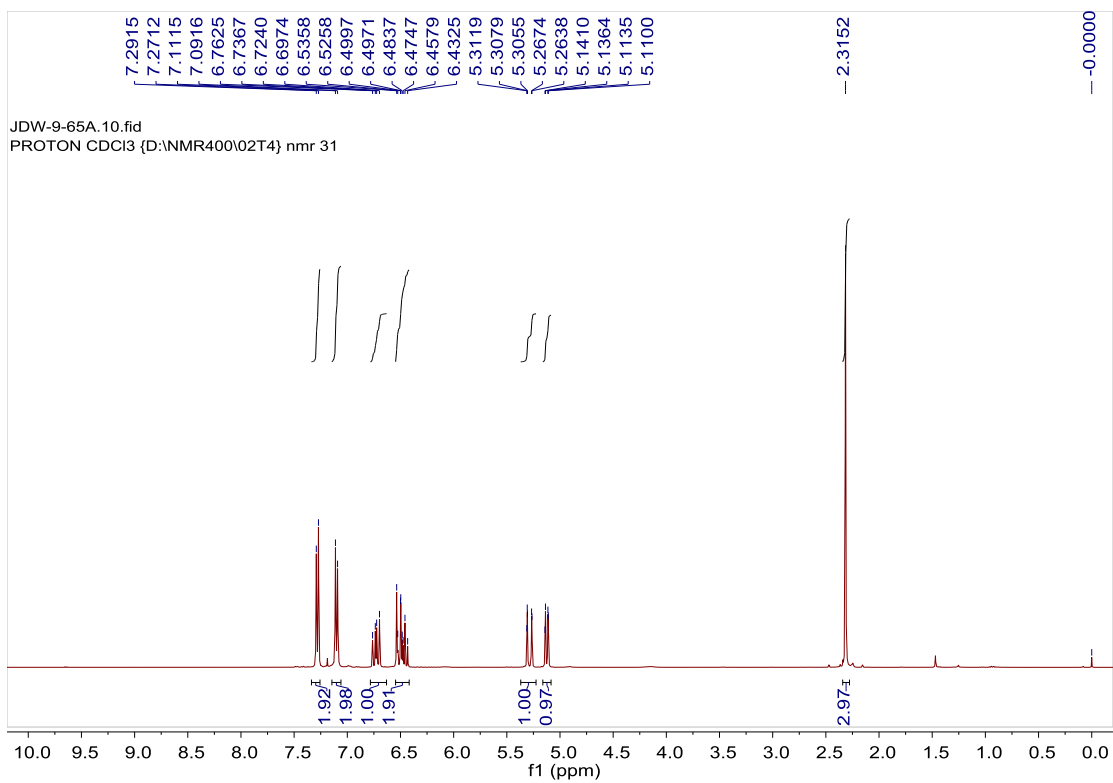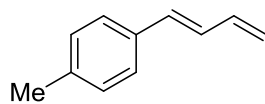

**1b** <sup>1</sup>H NMR (400 MHz, CDCl<sub>3</sub>)  
<sup>13</sup>C NMR (100 MHz, CDCl<sub>3</sub>)

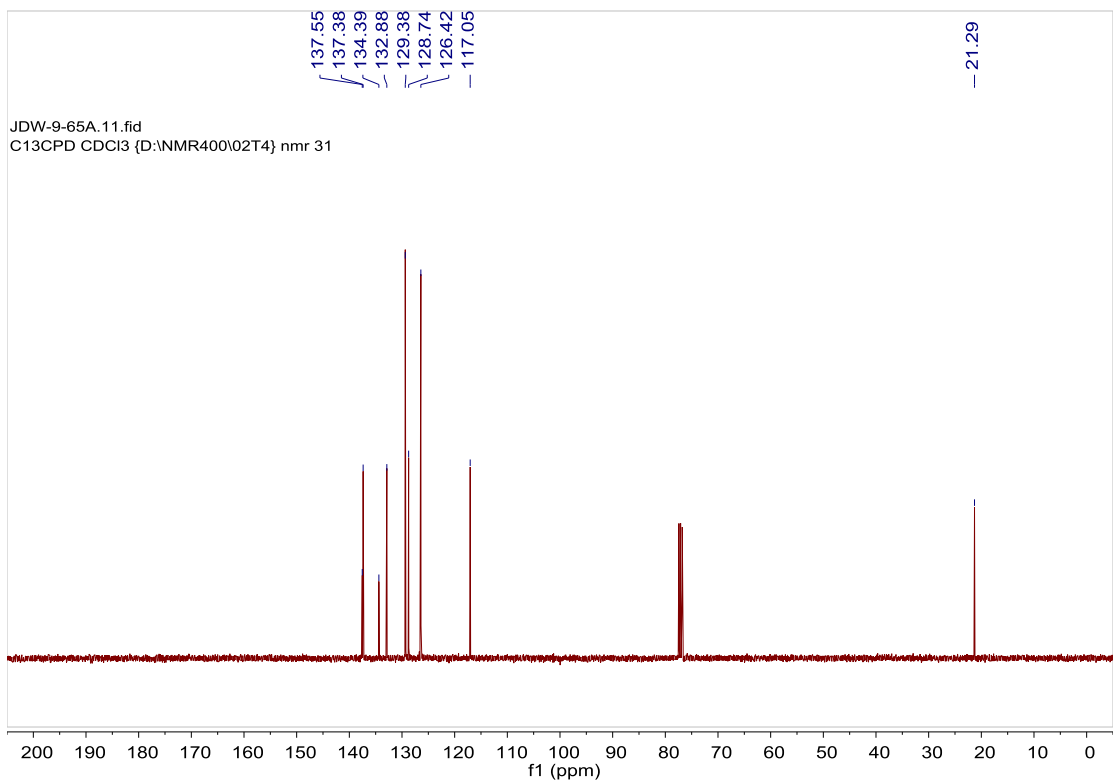

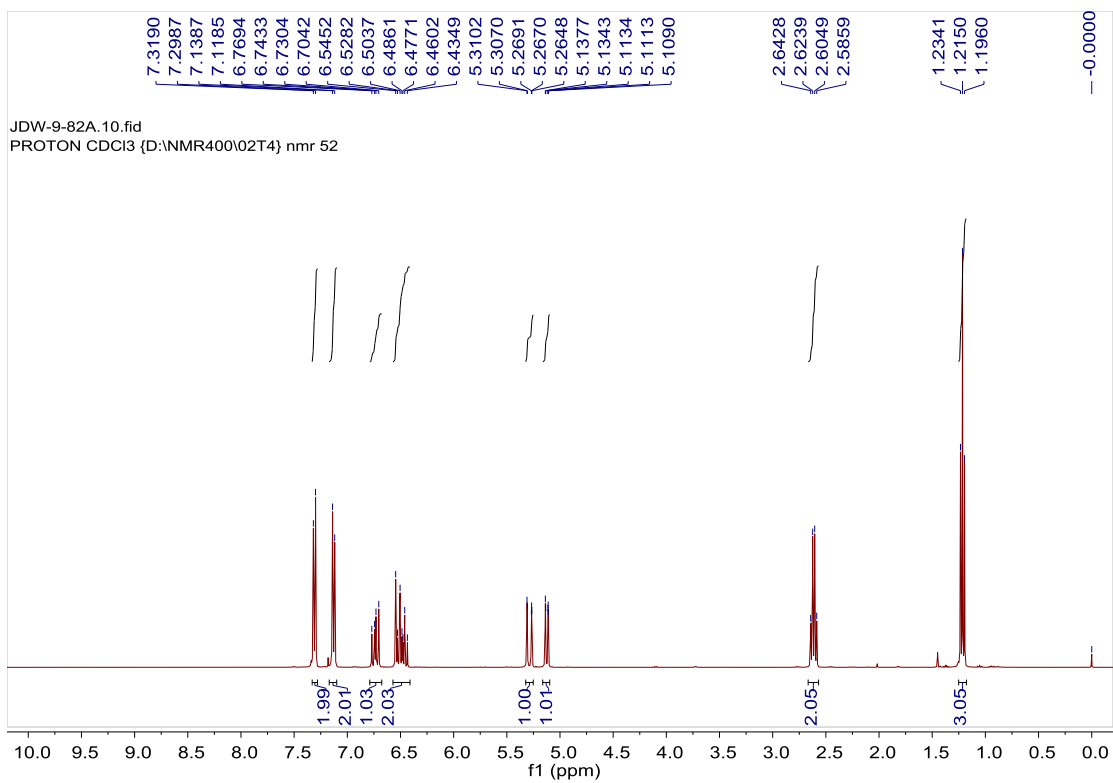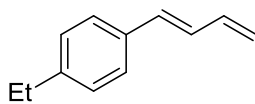

**1c** <sup>1</sup>H NMR (400 MHz, CDCl<sub>3</sub>)  
<sup>13</sup>C NMR (100 MHz, CDCl<sub>3</sub>)

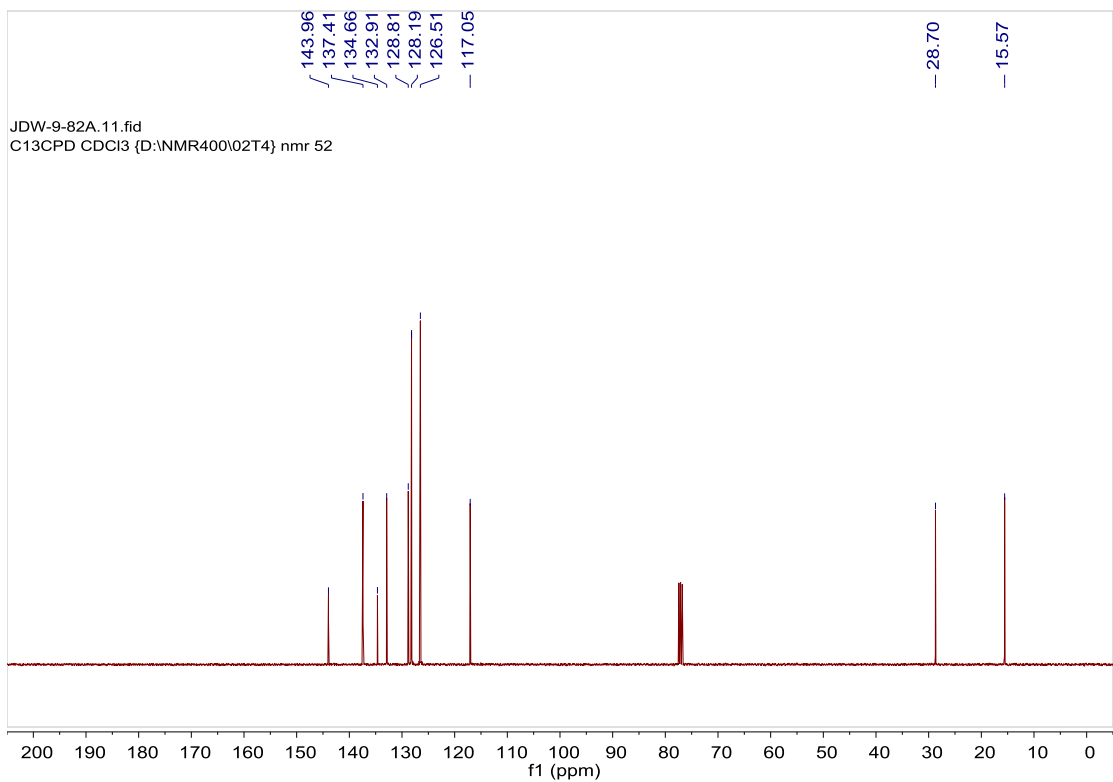



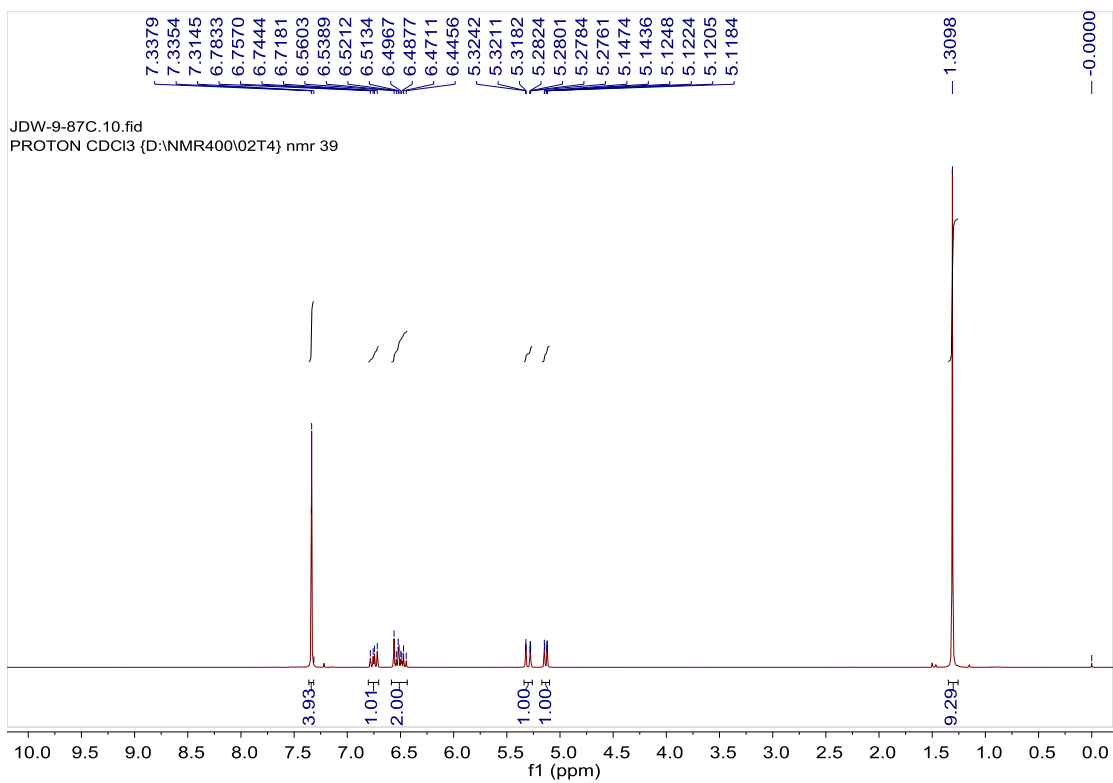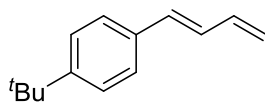

**1d** <sup>1</sup>H NMR (400 MHz, CDCl<sub>3</sub>)  
<sup>13</sup>C NMR (100 MHz, CDCl<sub>3</sub>)

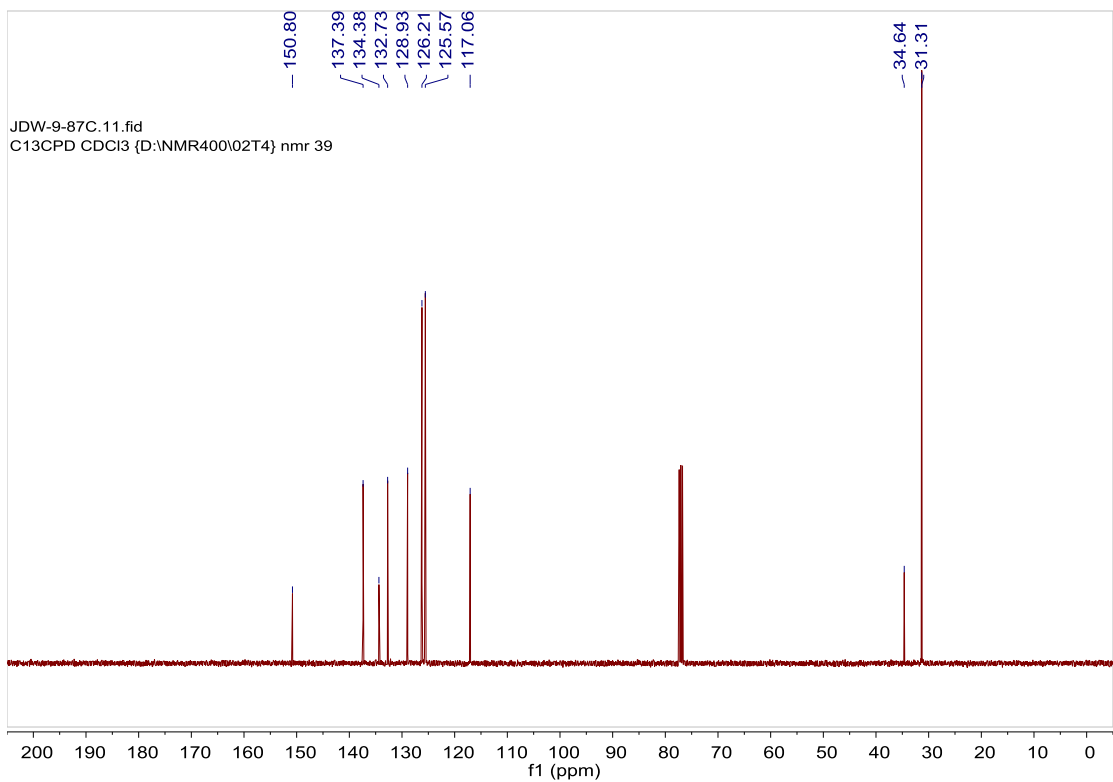

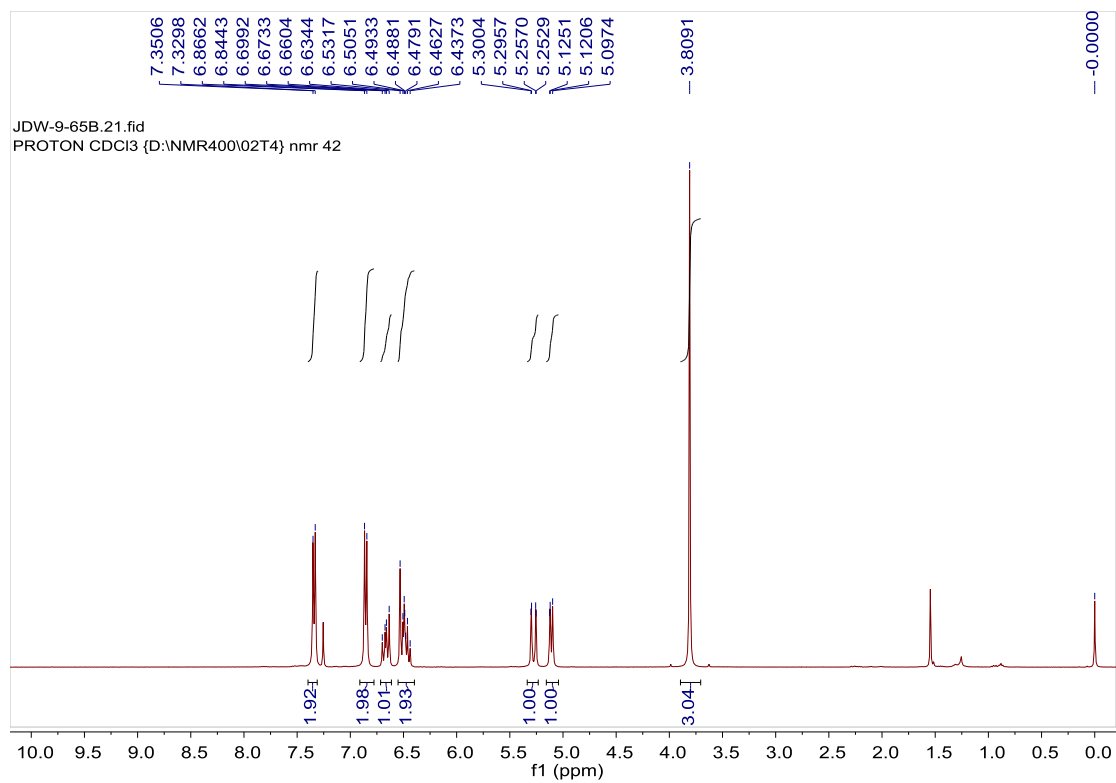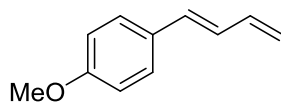

**1e** <sup>1</sup>H NMR (400 MHz, CDCl<sub>3</sub>)  
<sup>13</sup>C NMR (100 MHz, CDCl<sub>3</sub>)

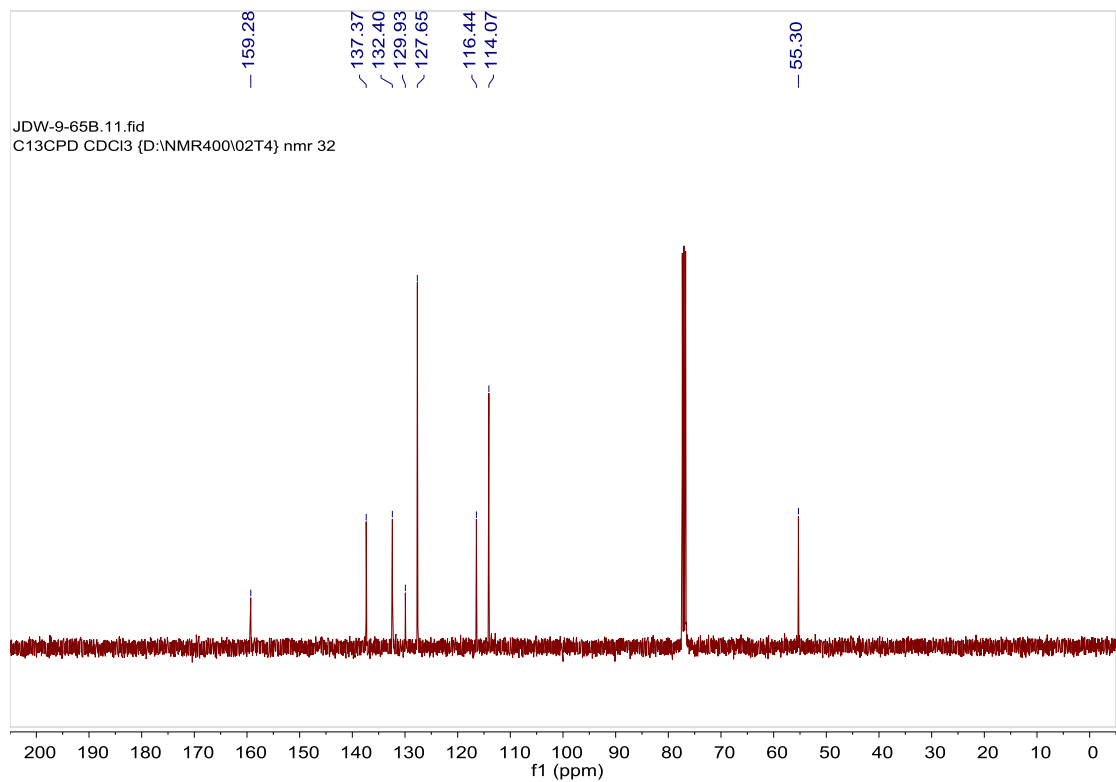

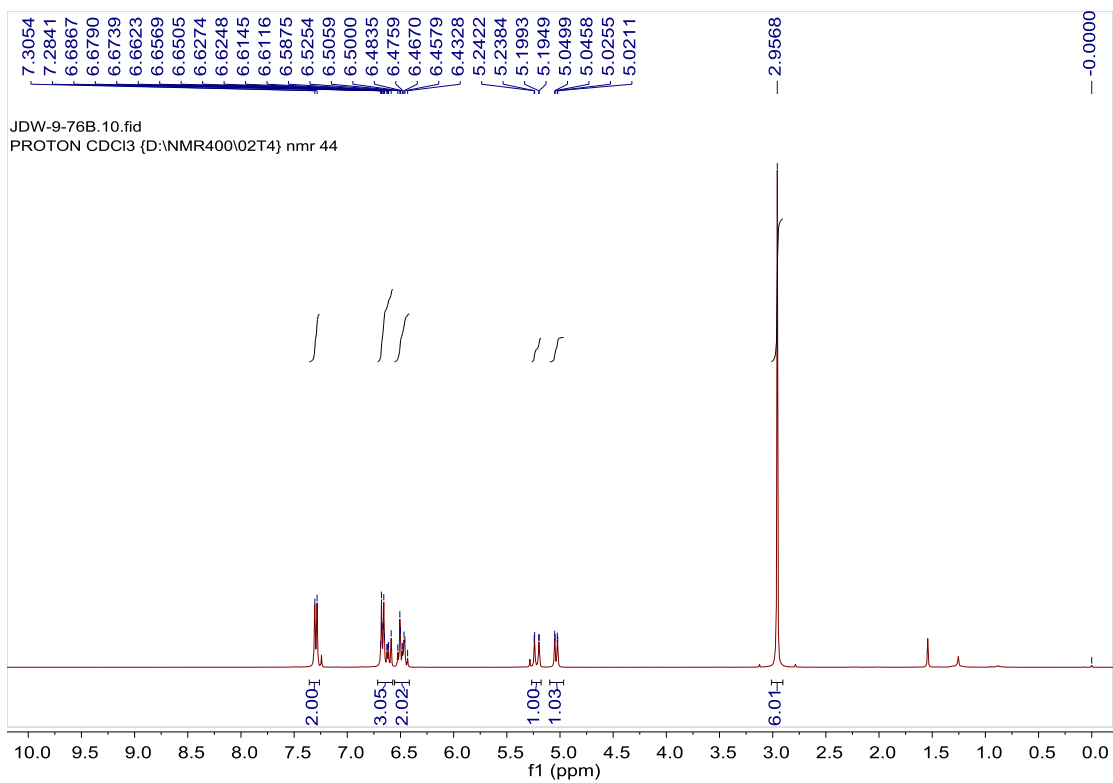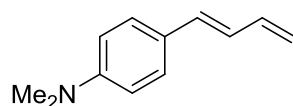

**1f** <sup>1</sup>H NMR (400 MHz, CDCl<sub>3</sub>)  
<sup>13</sup>C NMR (100 MHz, CDCl<sub>3</sub>)

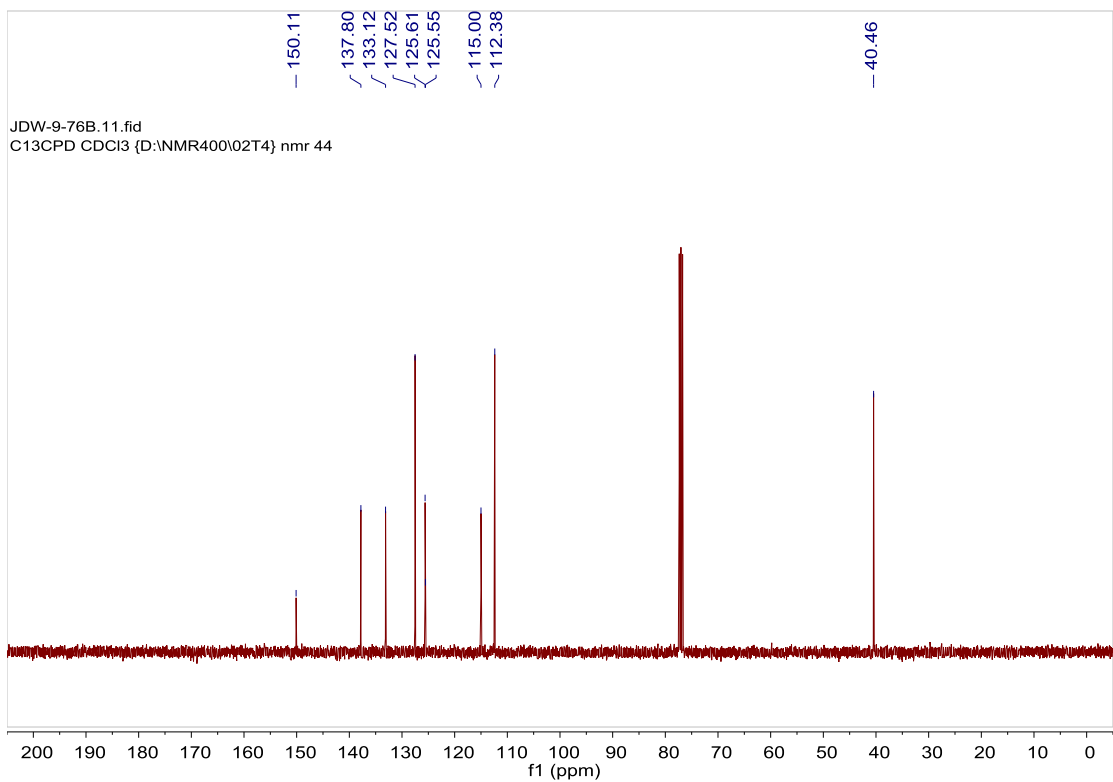

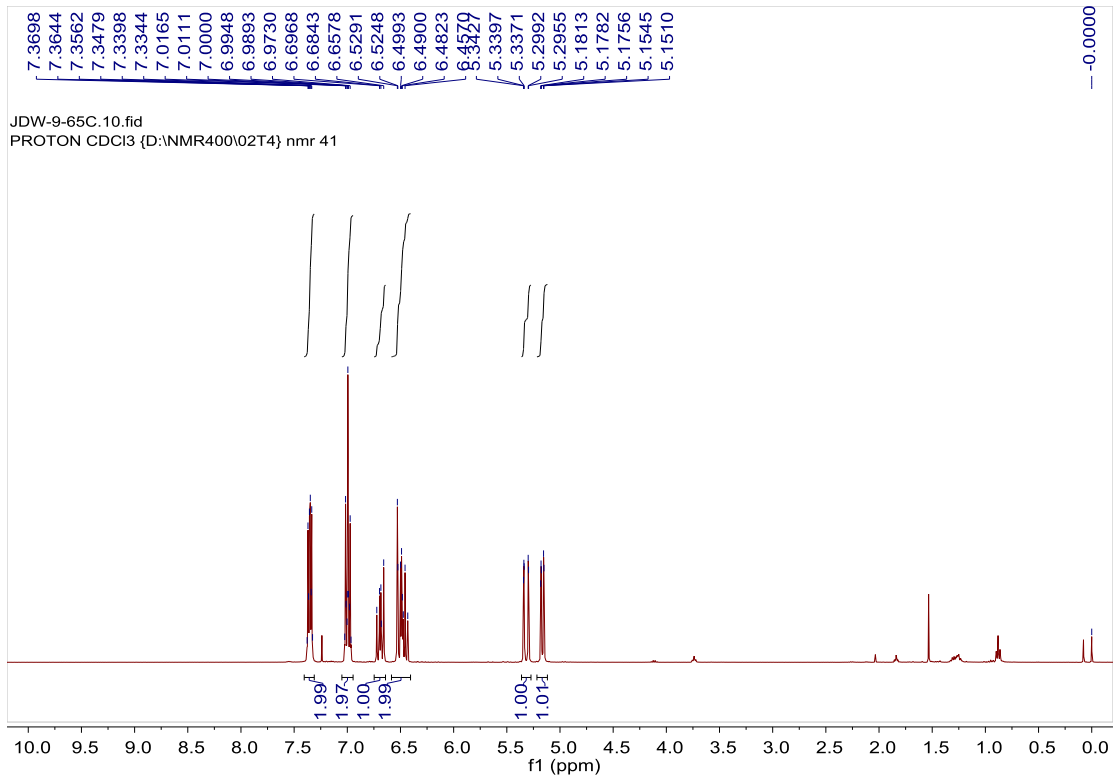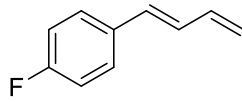

**1g** <sup>1</sup>H NMR (400 MHz, CDCl<sub>3</sub>)  
<sup>13</sup>C NMR (100 MHz, CDCl<sub>3</sub>)

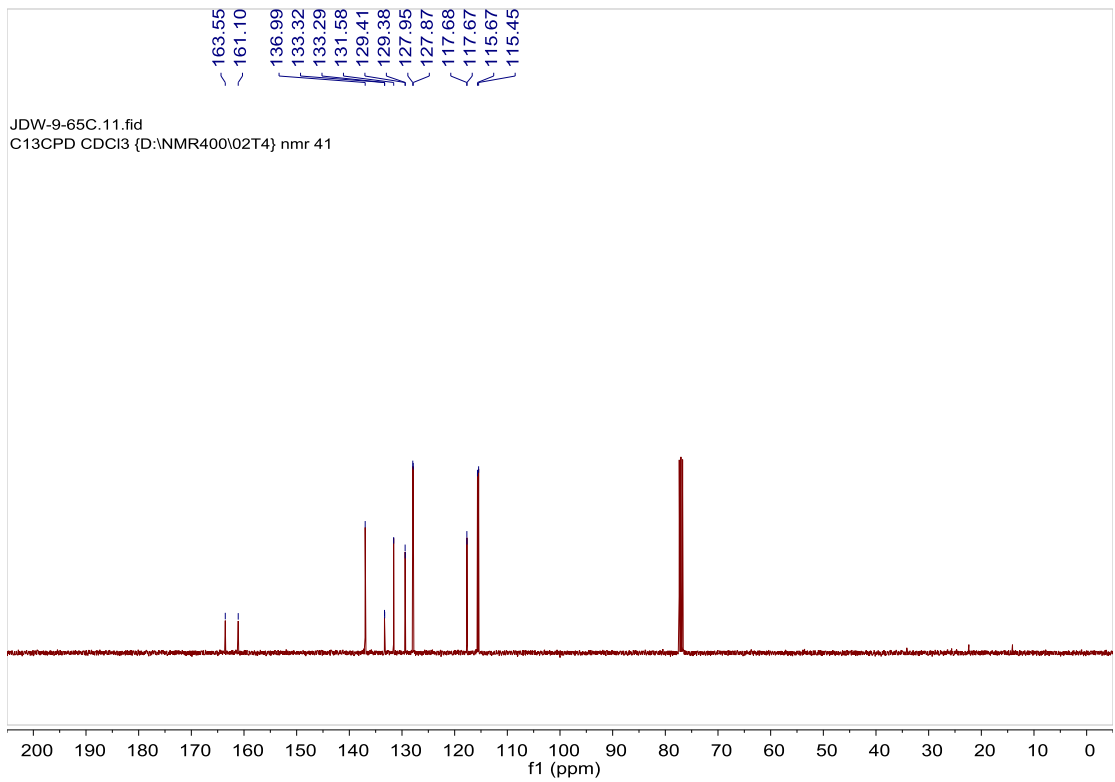

JDW-9-65C.12.fid  
F19CPD CDCl3 {D:\NMR400\02T4} nmr 41

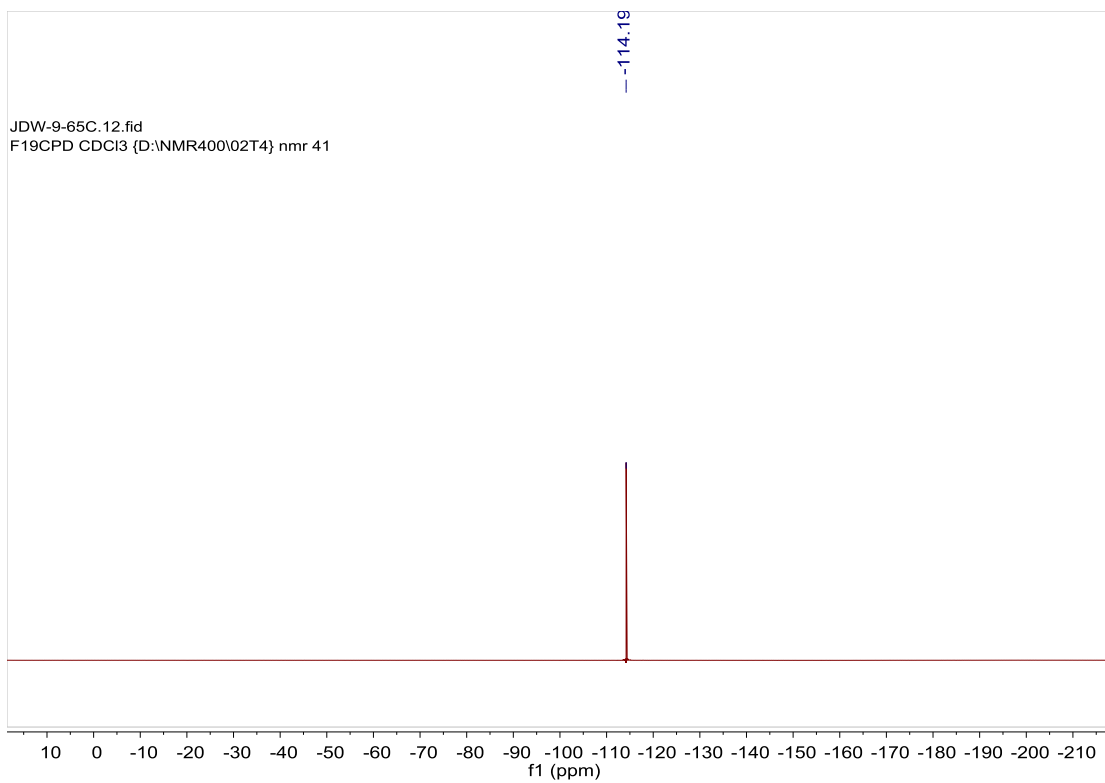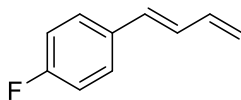

**1g**  $^{19}\text{F}$  NMR (376 MHz,  $\text{CDCl}_3$ )

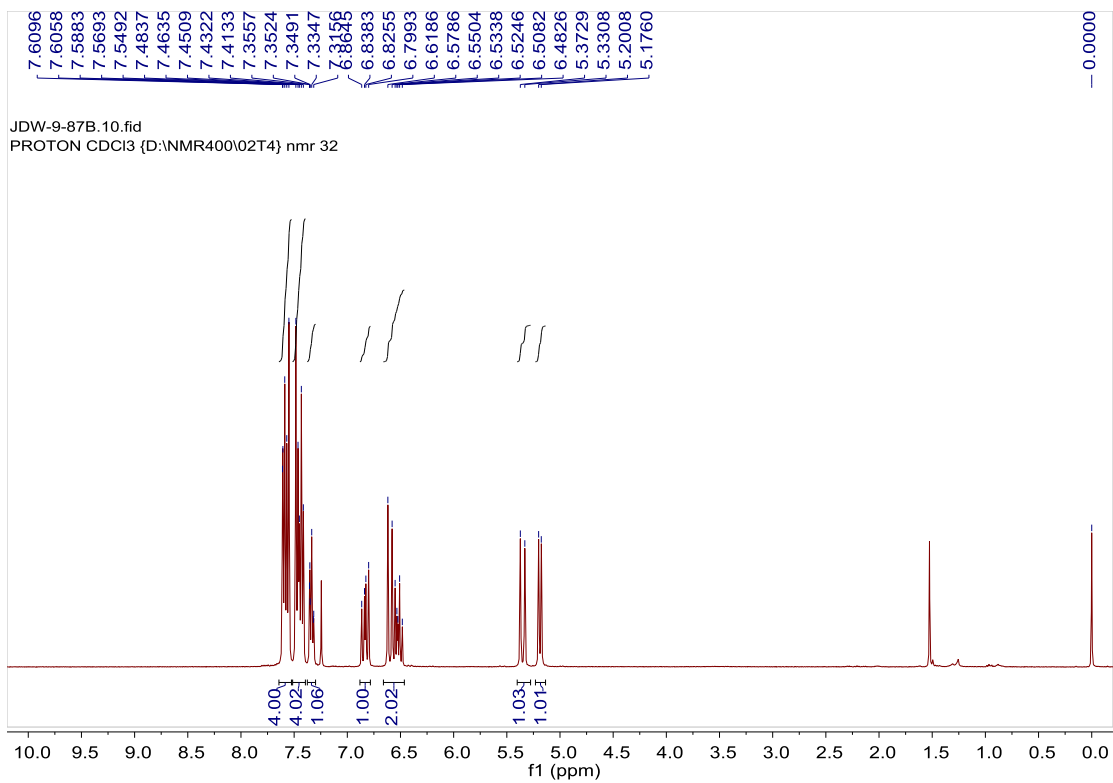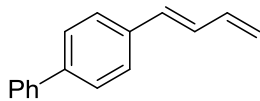

**1h**  $^1\text{H}$  NMR (400 MHz,  $\text{CDCl}_3$ )  
 $^{13}\text{C}$  NMR (100 MHz,  $\text{CDCl}_3$ )

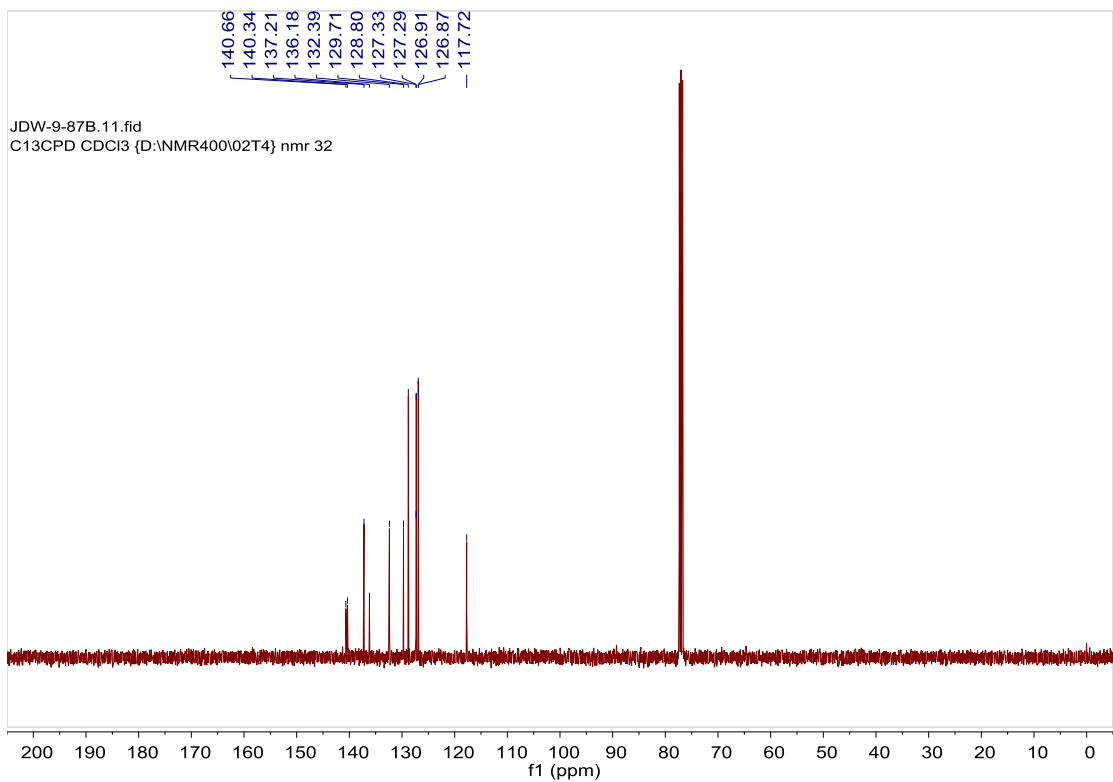

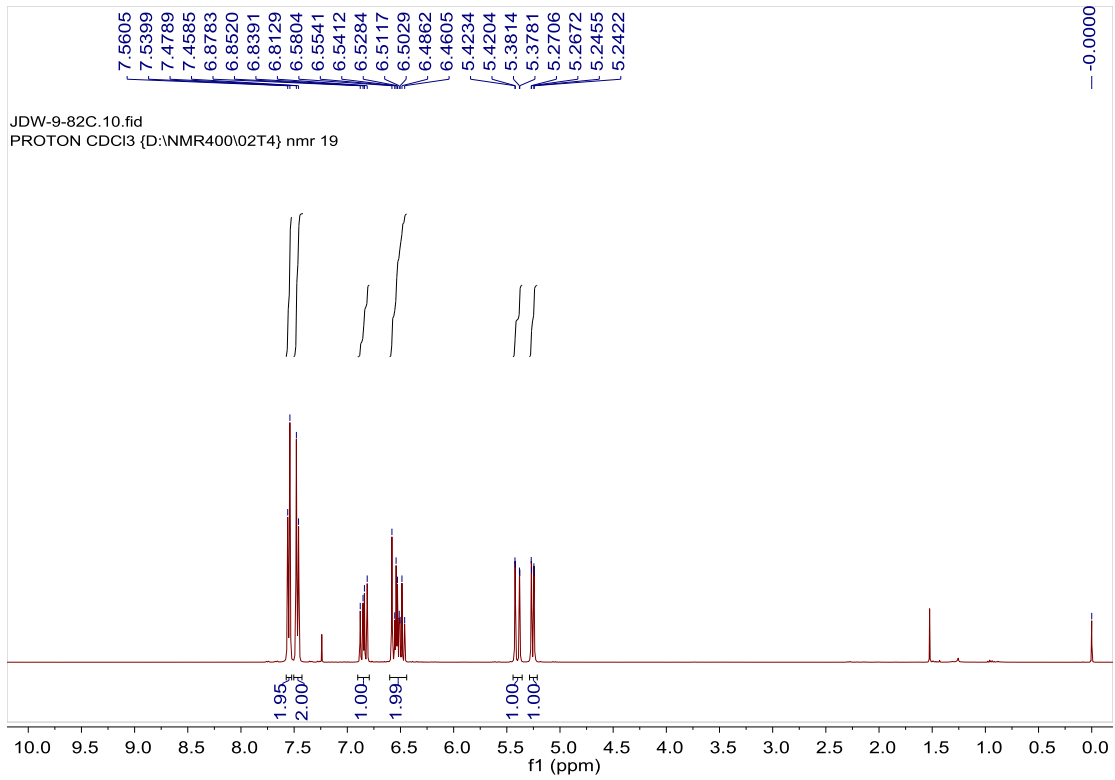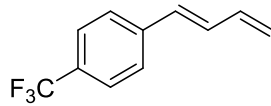

**1i** <sup>1</sup>H NMR (400 MHz, CDCl<sub>3</sub>)  
<sup>13</sup>C NMR (100 MHz, CDCl<sub>3</sub>)

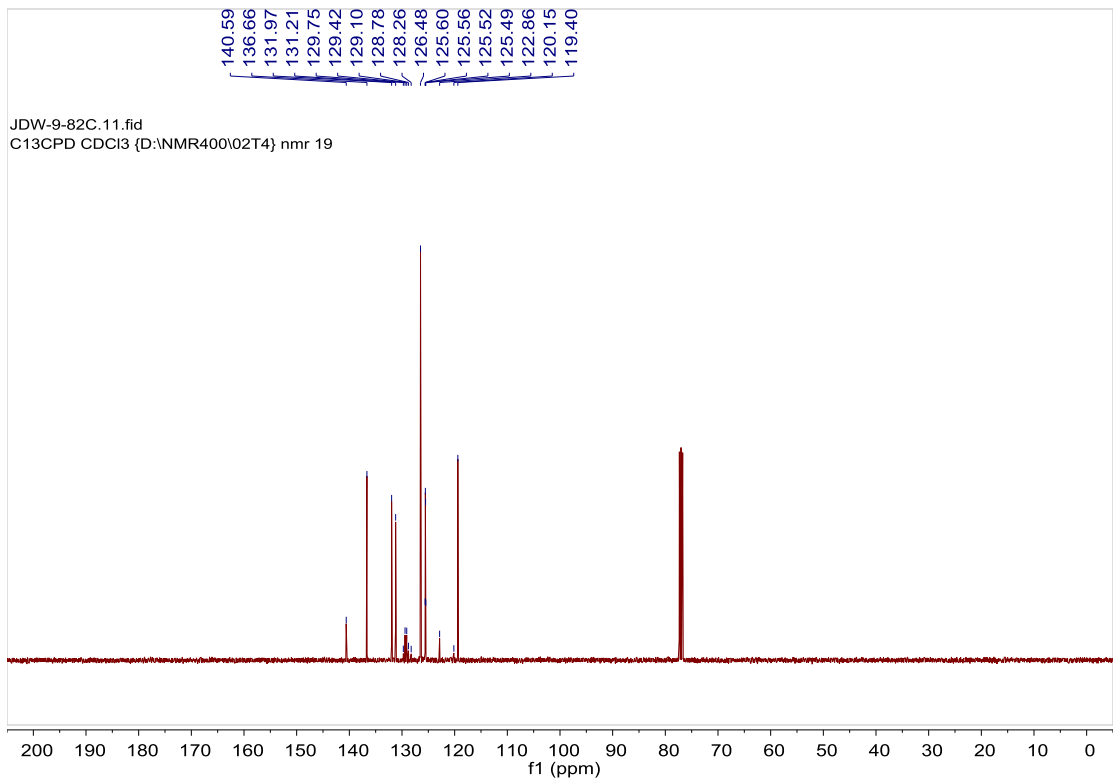

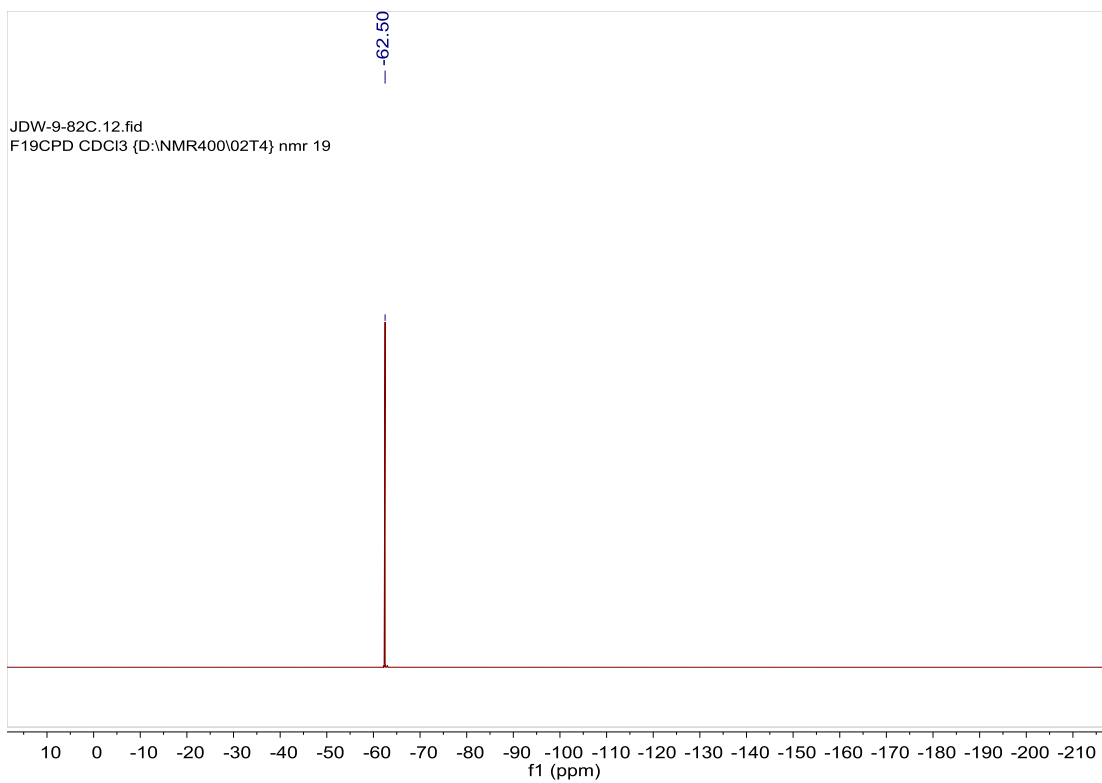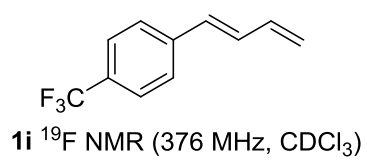



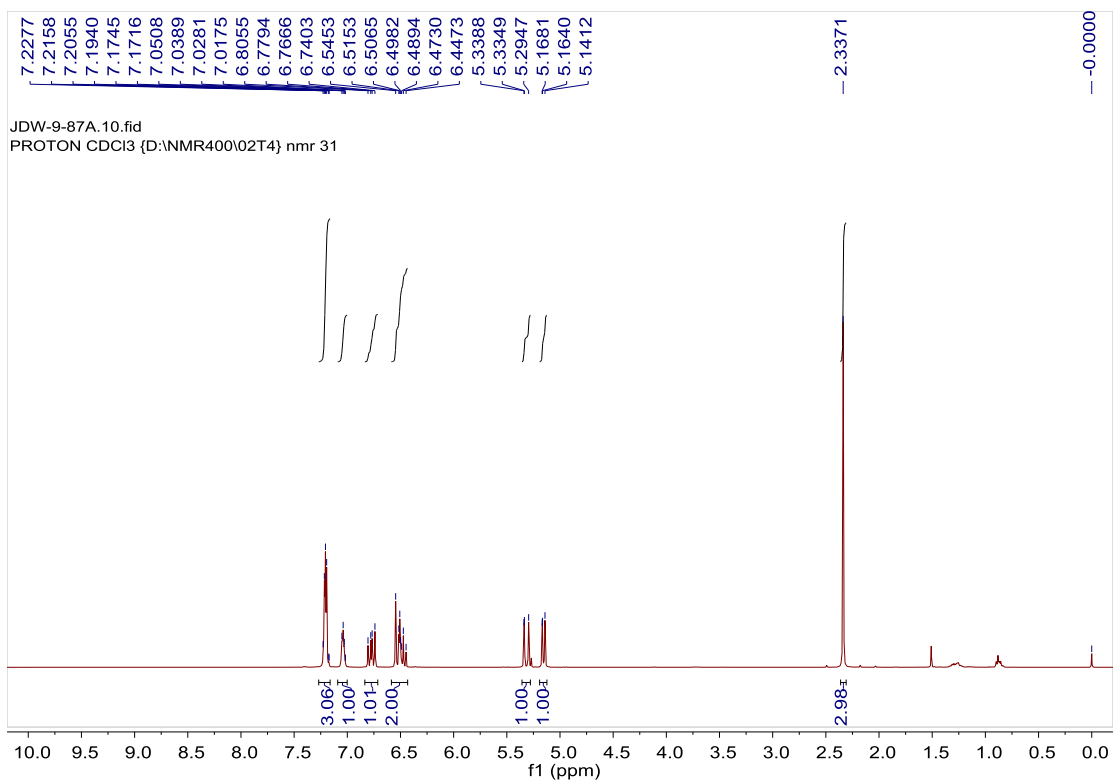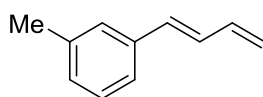

**1j** <sup>1</sup>H NMR (400 MHz, CDCl<sub>3</sub>)  
<sup>13</sup>C NMR (100 MHz, CDCl<sub>3</sub>)

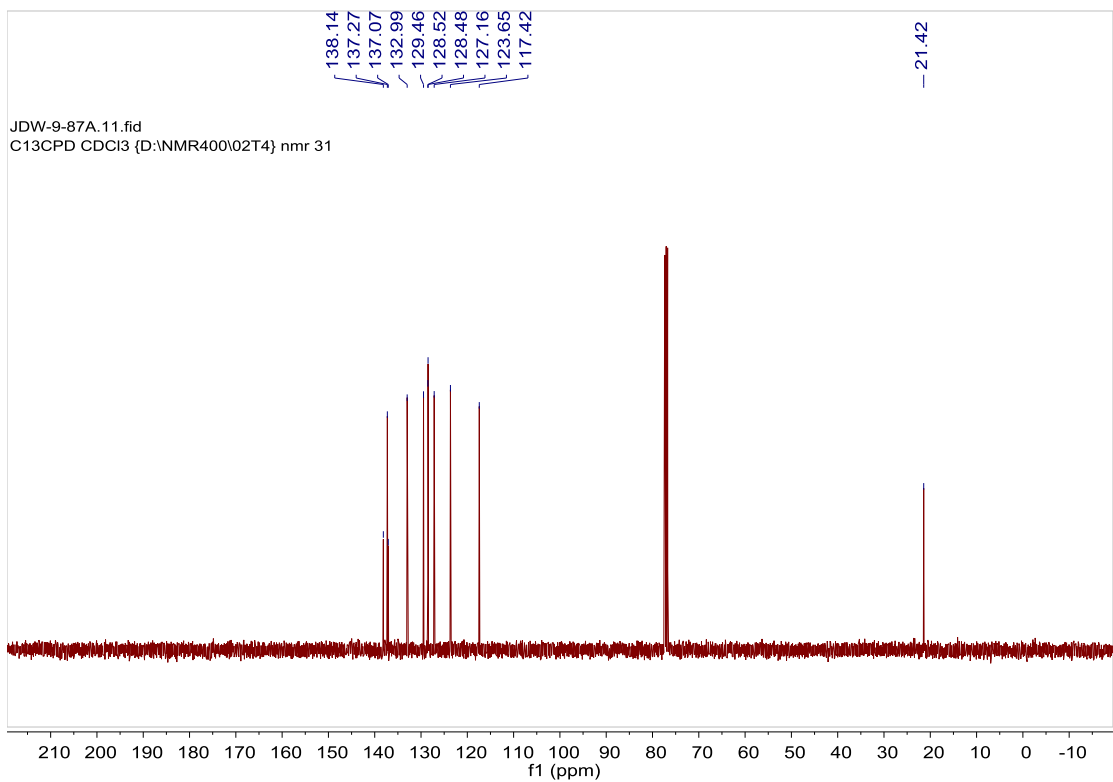

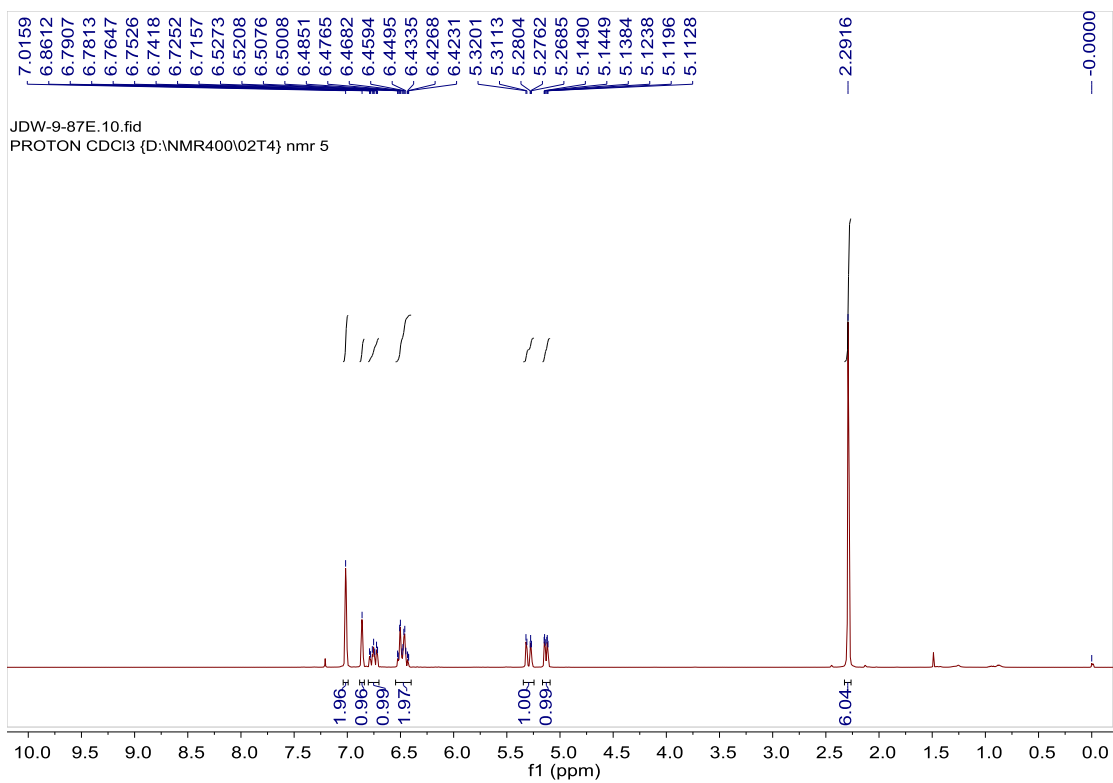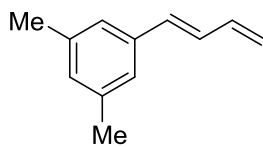

**1k** <sup>1</sup>H NMR (400 MHz, CDCl<sub>3</sub>)  
<sup>13</sup>C NMR (100 MHz, CDCl<sub>3</sub>)

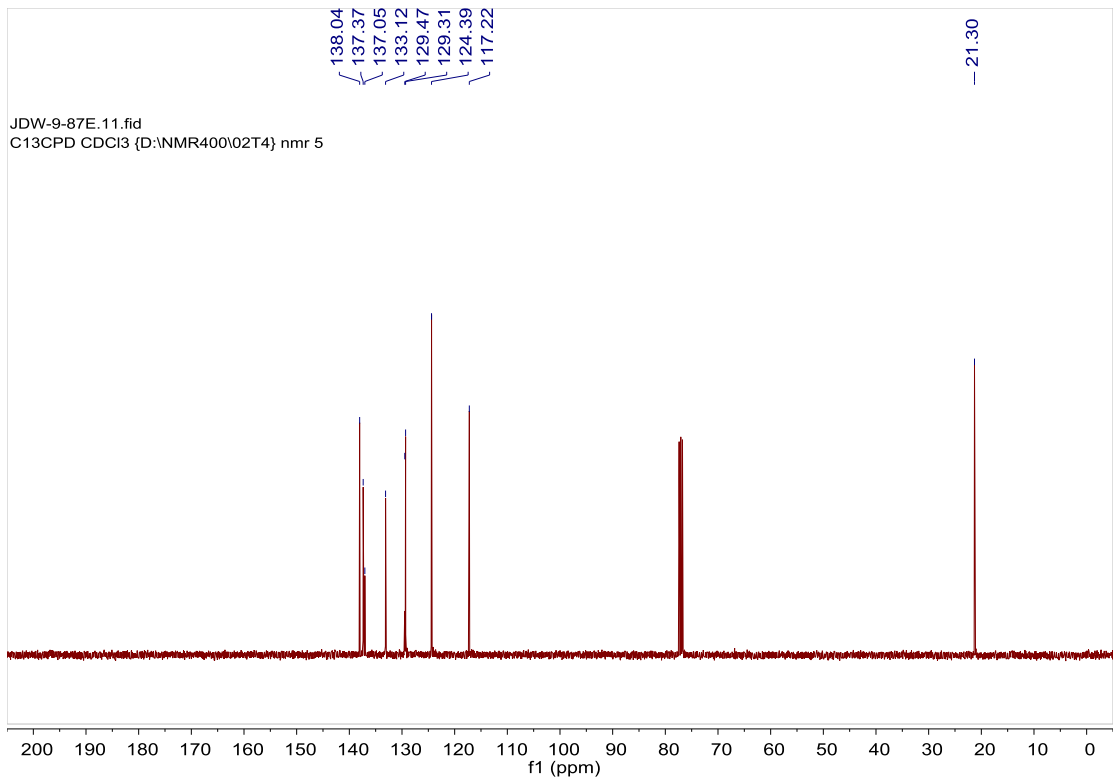

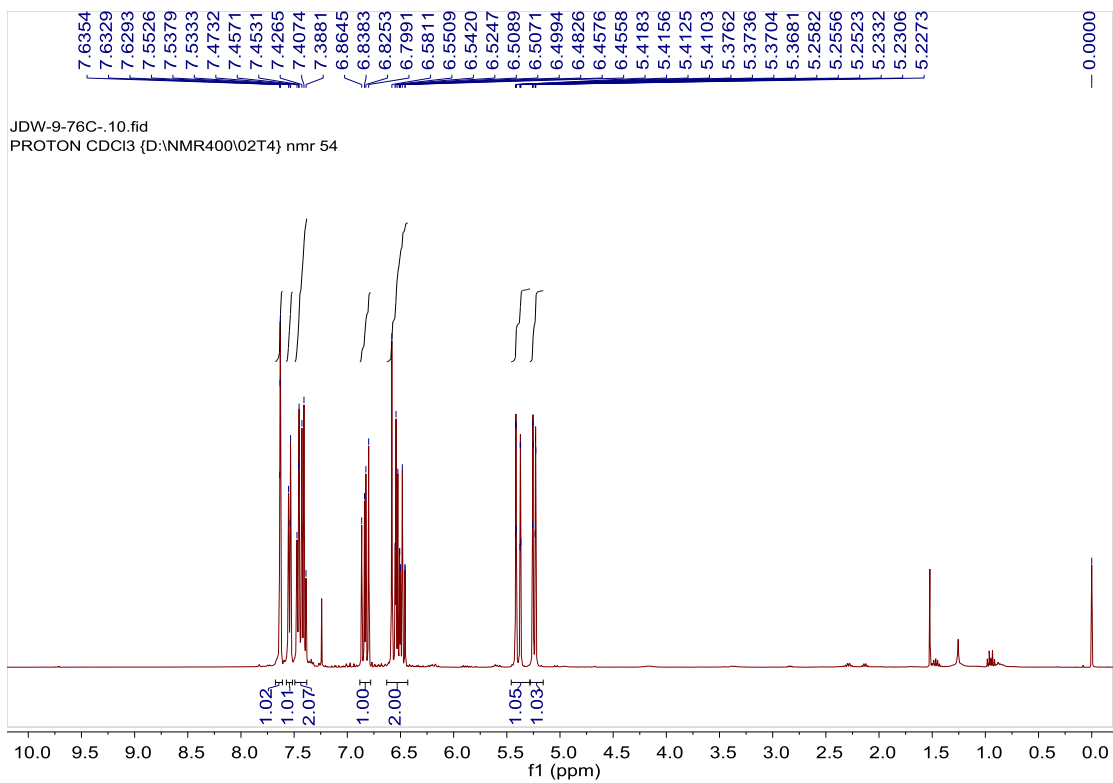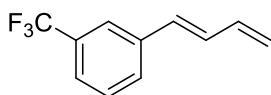

**11**  $^1\text{H}$  NMR (400 MHz,  $\text{CDCl}_3$ )  
 $^{13}\text{C}$  NMR (100 MHz,  $\text{CDCl}_3$ )

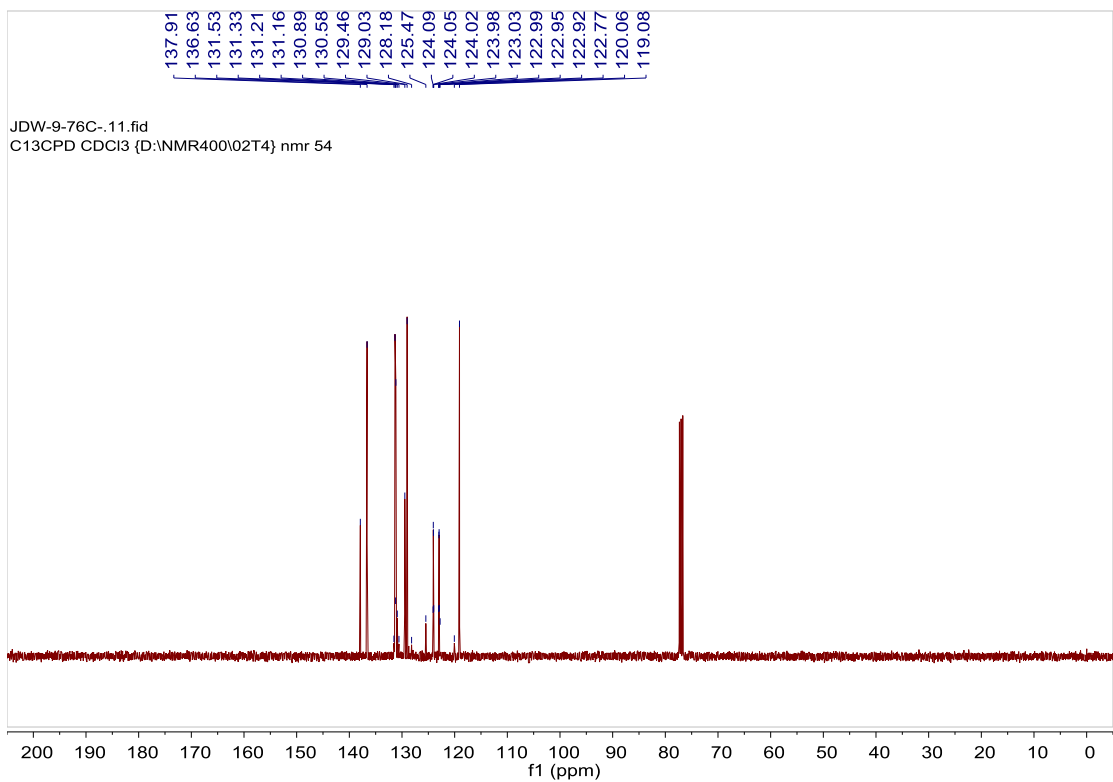

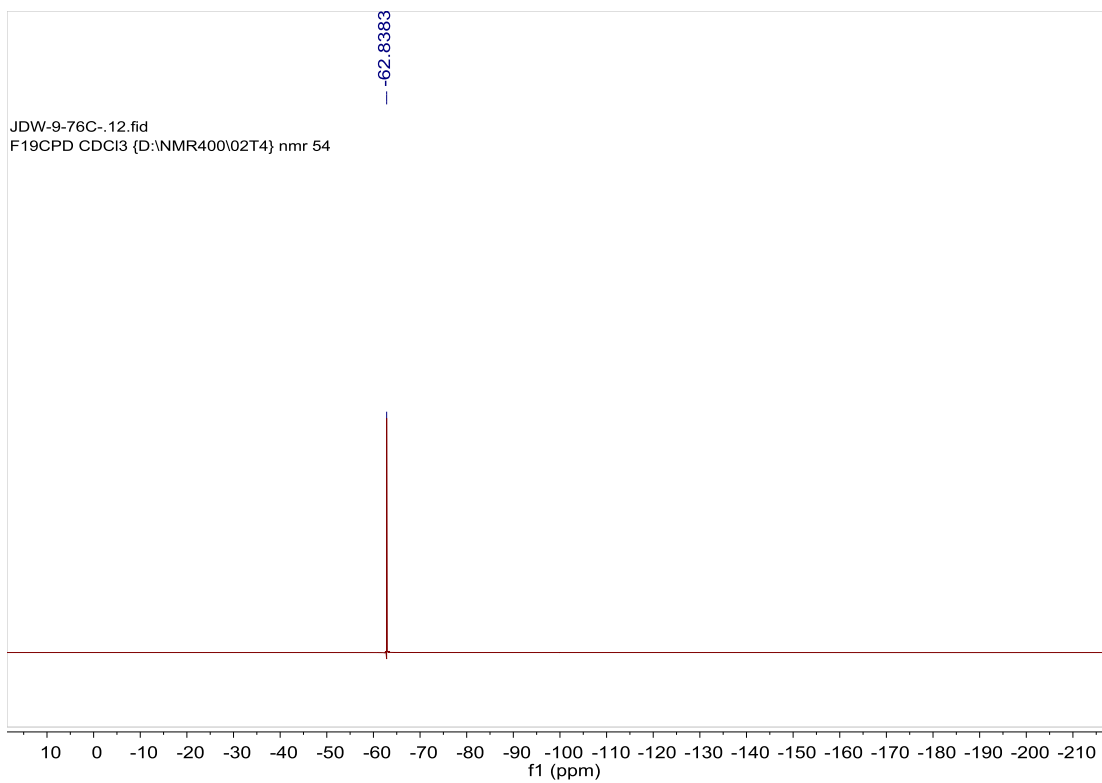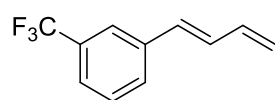

11 <sup>19</sup>F NMR (376 MHz, CDCl<sub>3</sub>)

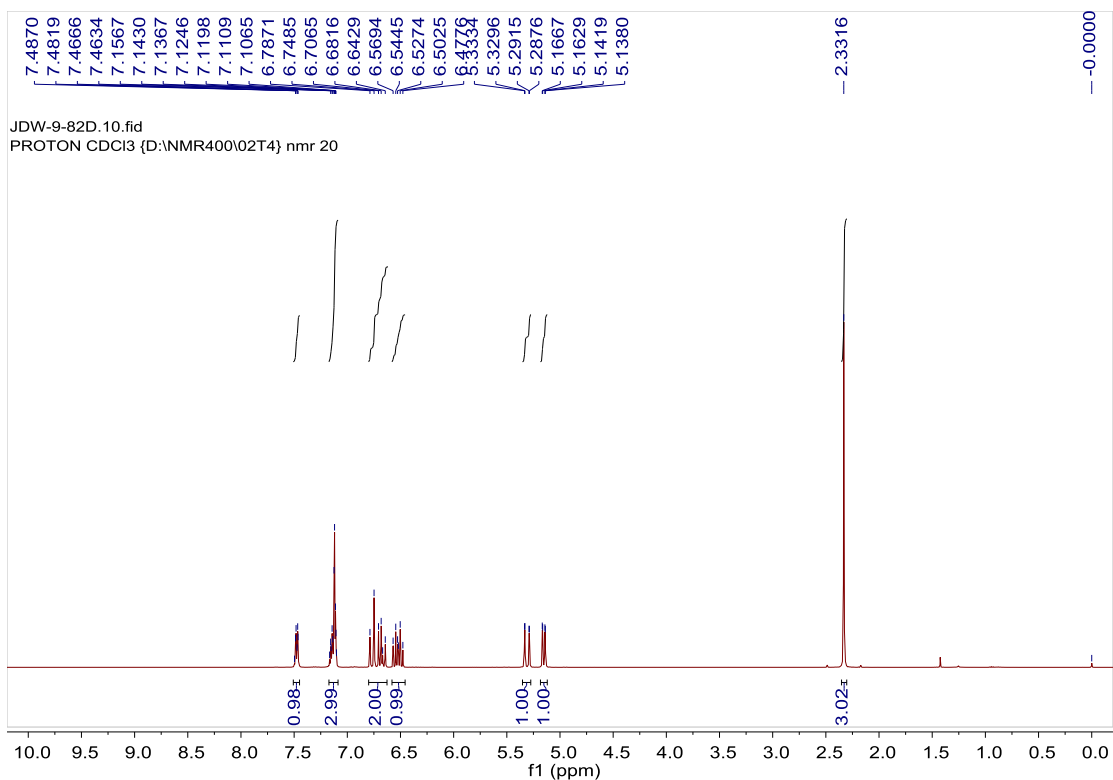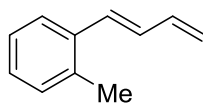

**1m** <sup>1</sup>H NMR (400 MHz, CDCl<sub>3</sub>)  
<sup>13</sup>C NMR (100 MHz, CDCl<sub>3</sub>)

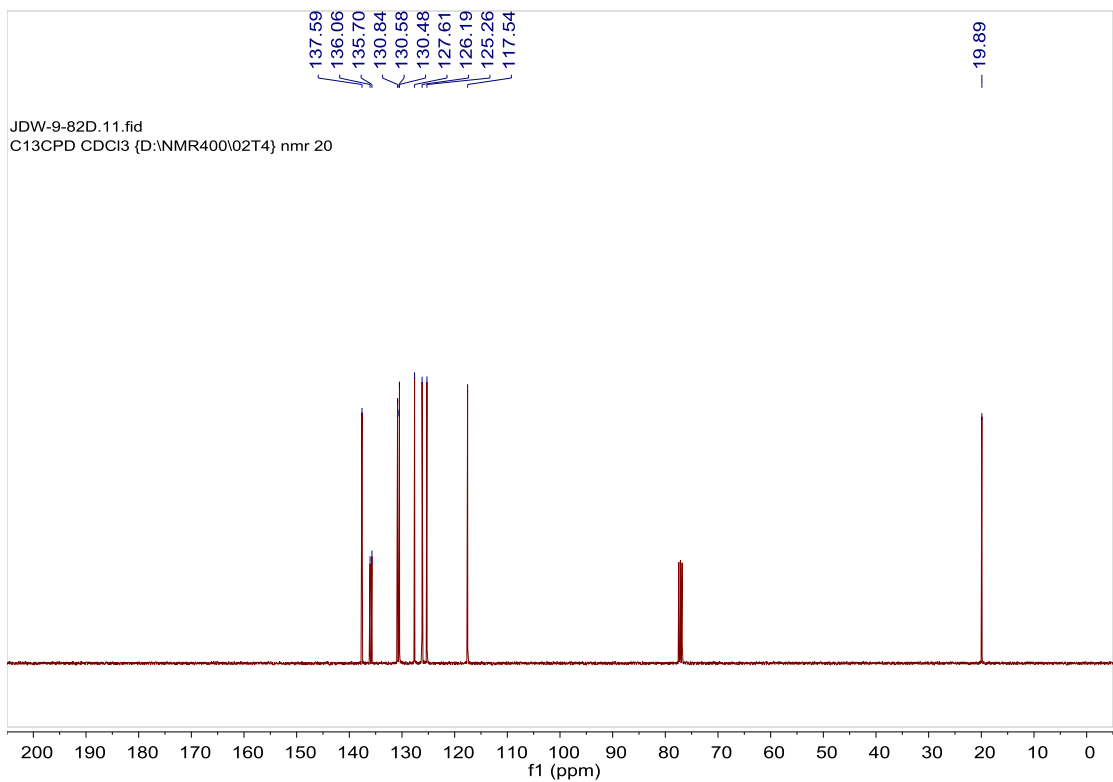

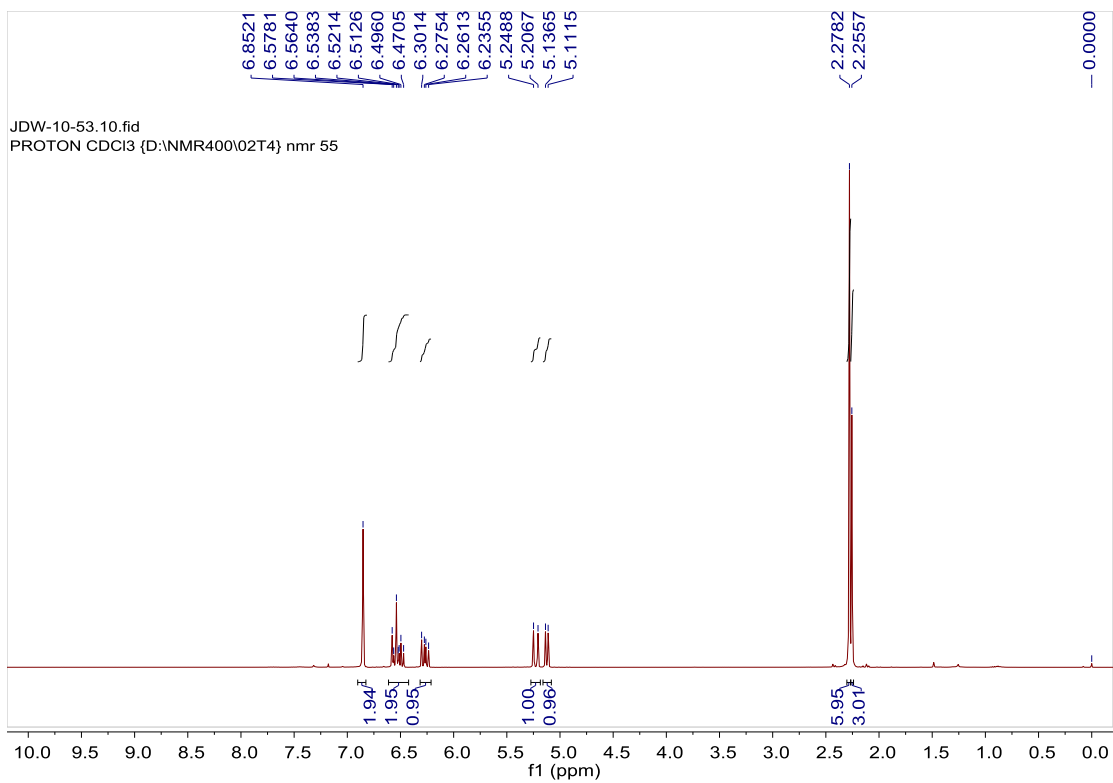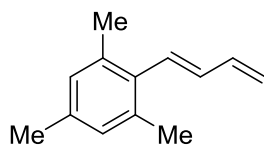

**1n** <sup>1</sup>H NMR (400 MHz, CDCl<sub>3</sub>)  
<sup>13</sup>C NMR (100 MHz, CDCl<sub>3</sub>)

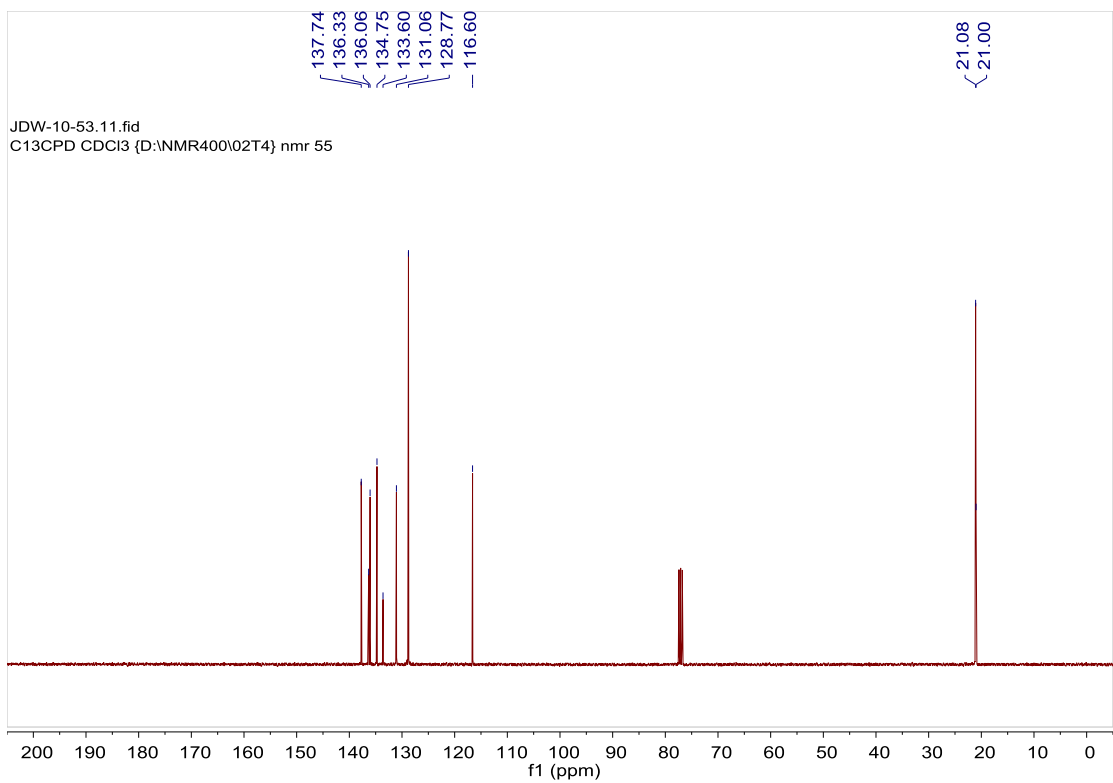

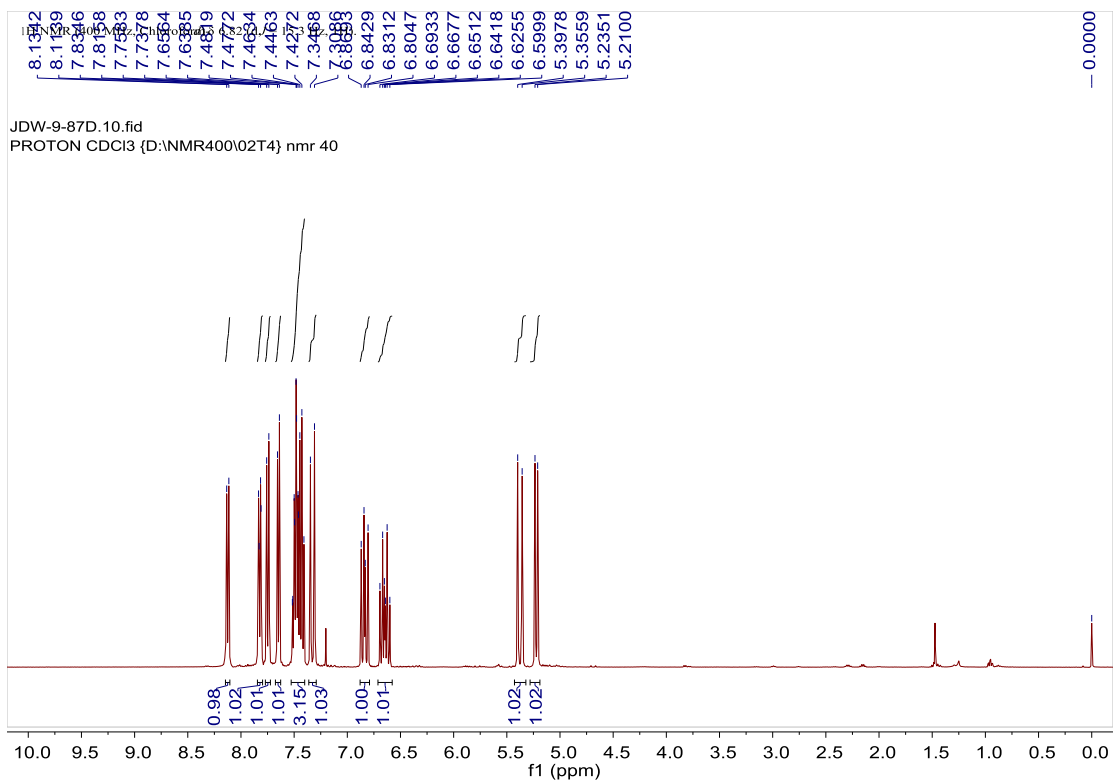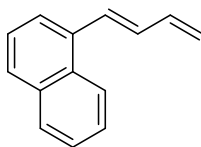

**1o**  $^1\text{H}$  NMR (400 MHz,  $\text{CDCl}_3$ )  
 $^{13}\text{C}$  NMR (100 MHz,  $\text{CDCl}_3$ )

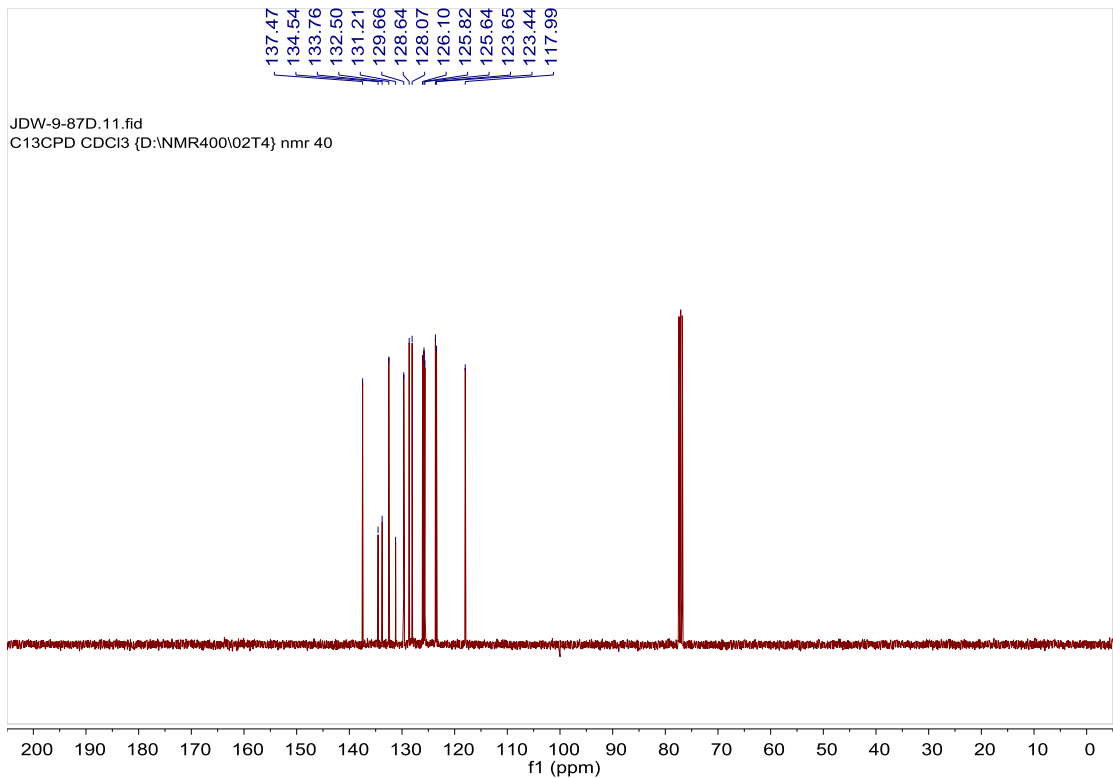

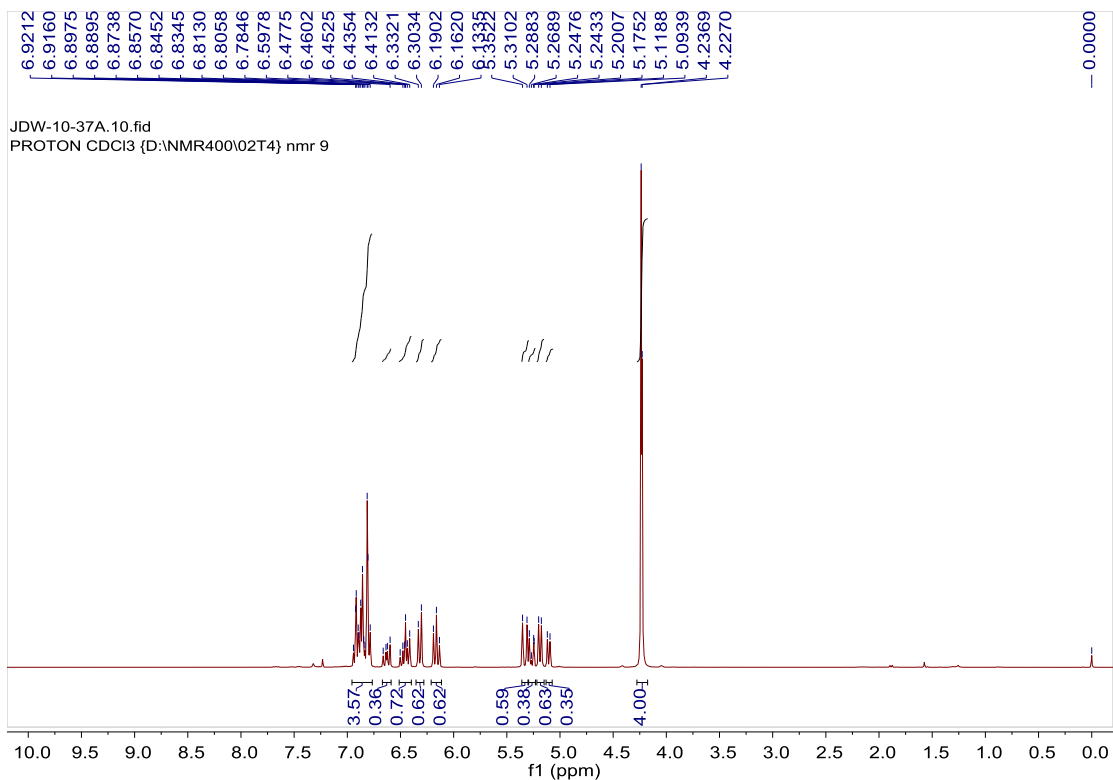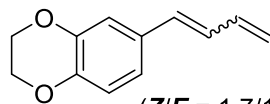

**1p** <sup>1</sup>H NMR (400 MHz, CDCl<sub>3</sub>)

<sup>13</sup>C NMR (100 MHz, CDCl<sub>3</sub>)

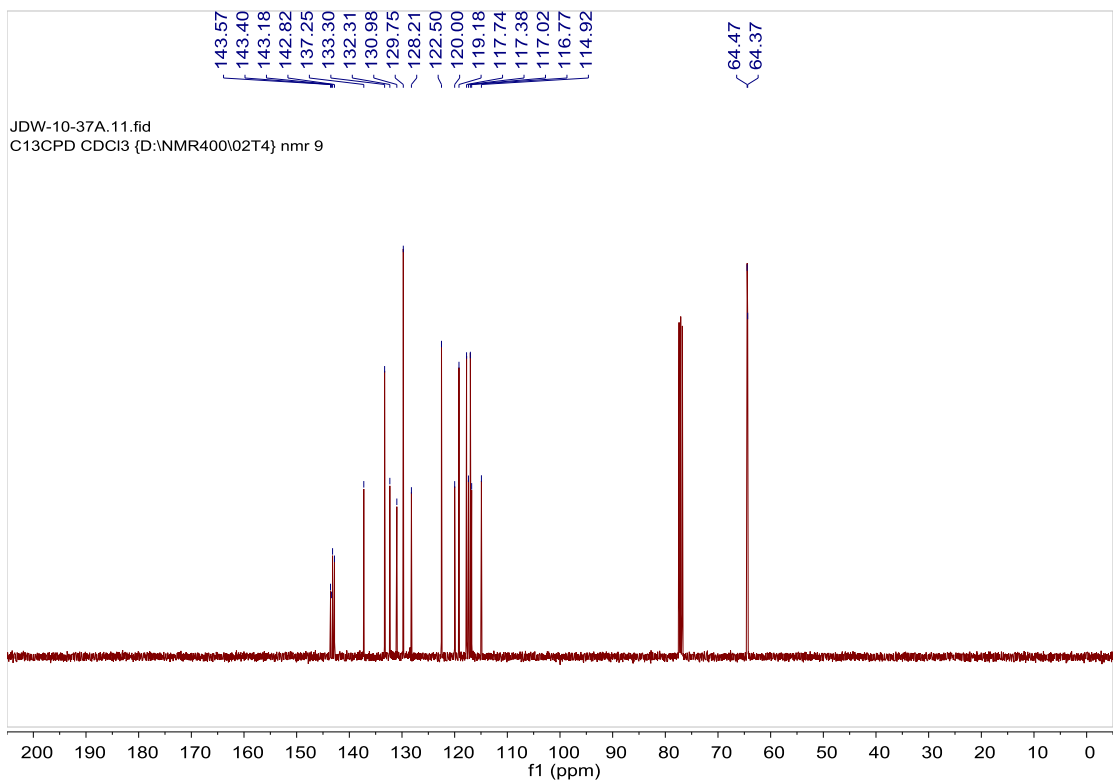



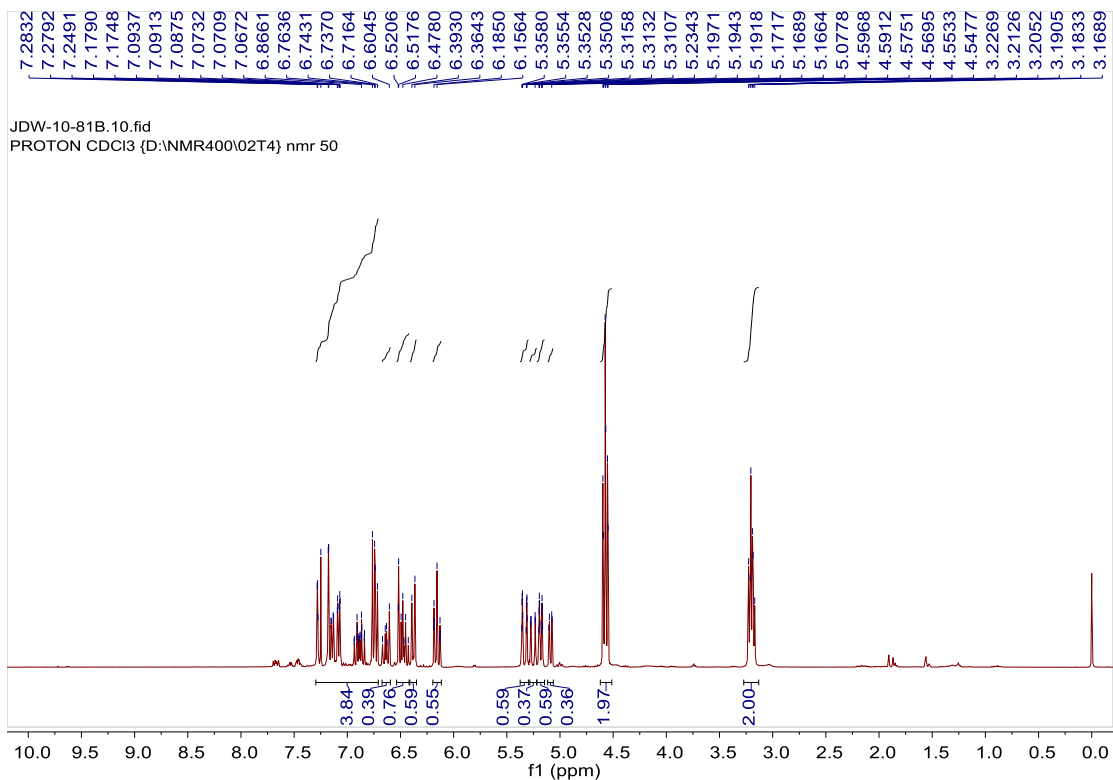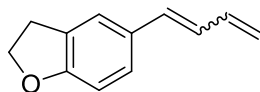

(Z/E = 1.7/1)

**1q**  $^1\text{H}$  NMR (400 MHz,  $\text{CDCl}_3$ )

$^{13}\text{C}$  NMR (100 MHz,  $\text{CDCl}_3$ )

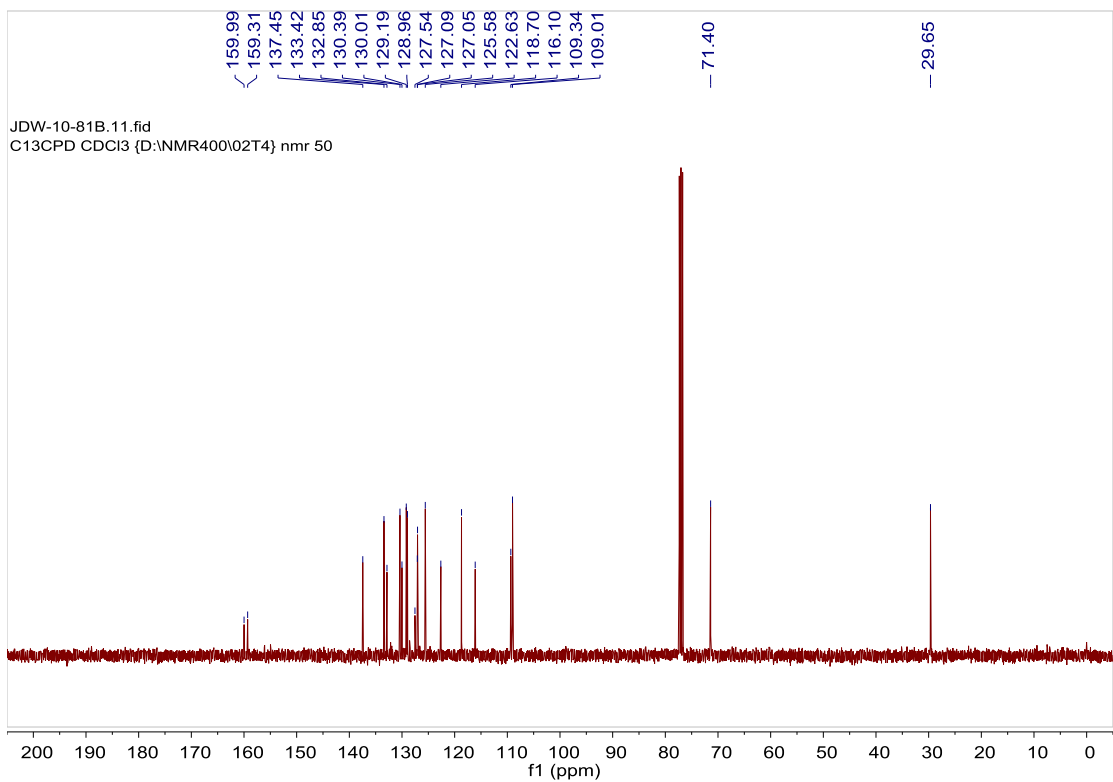

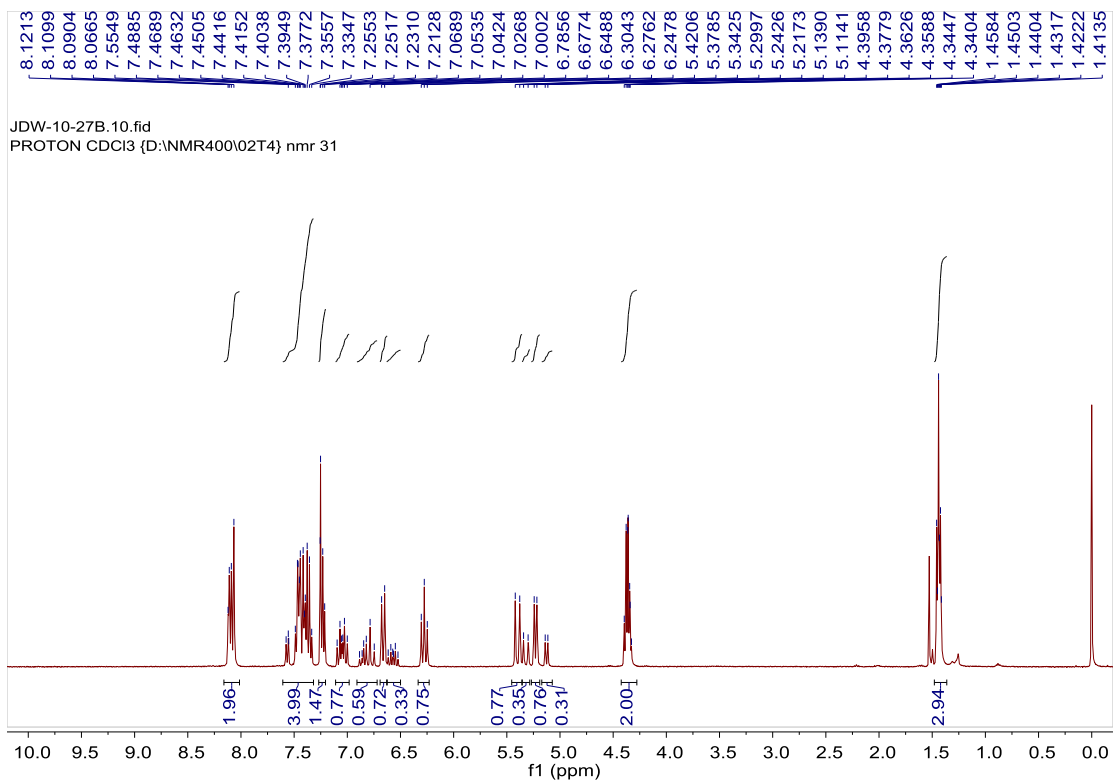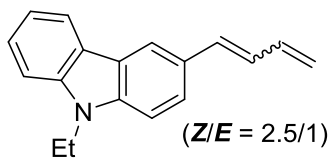

**1r** <sup>1</sup>H NMR (400 MHz, CDCl<sub>3</sub>)  
<sup>13</sup>C NMR (100 MHz, CDCl<sub>3</sub>)

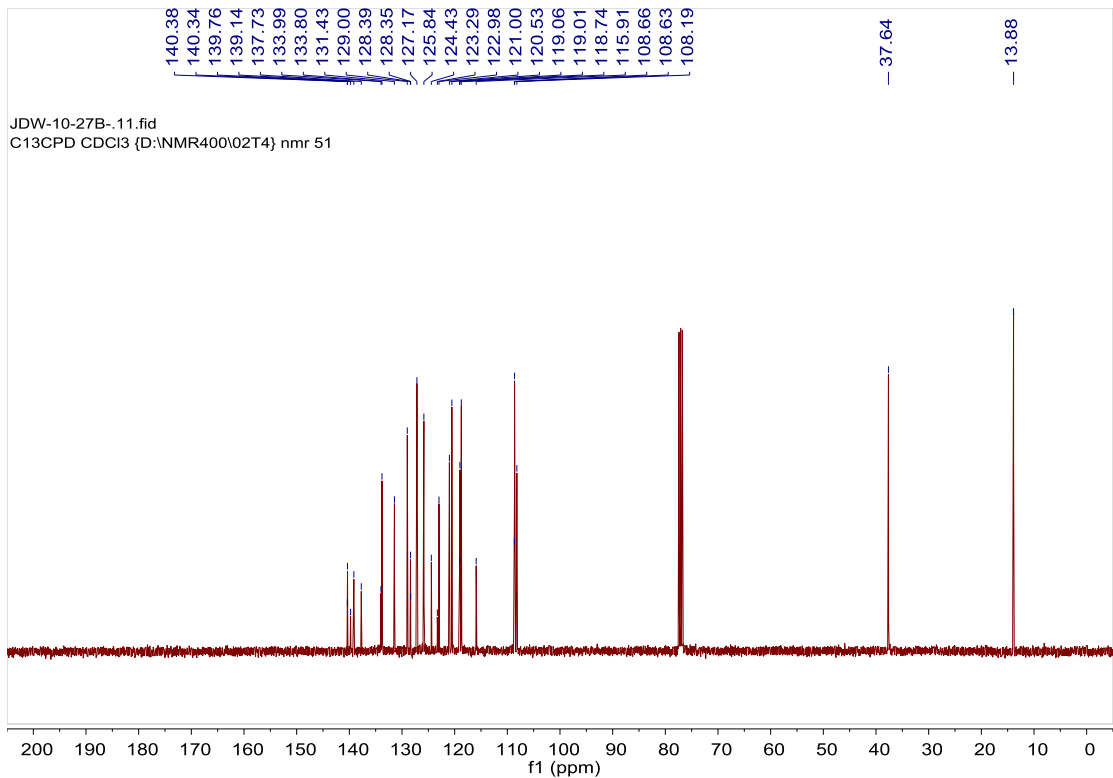

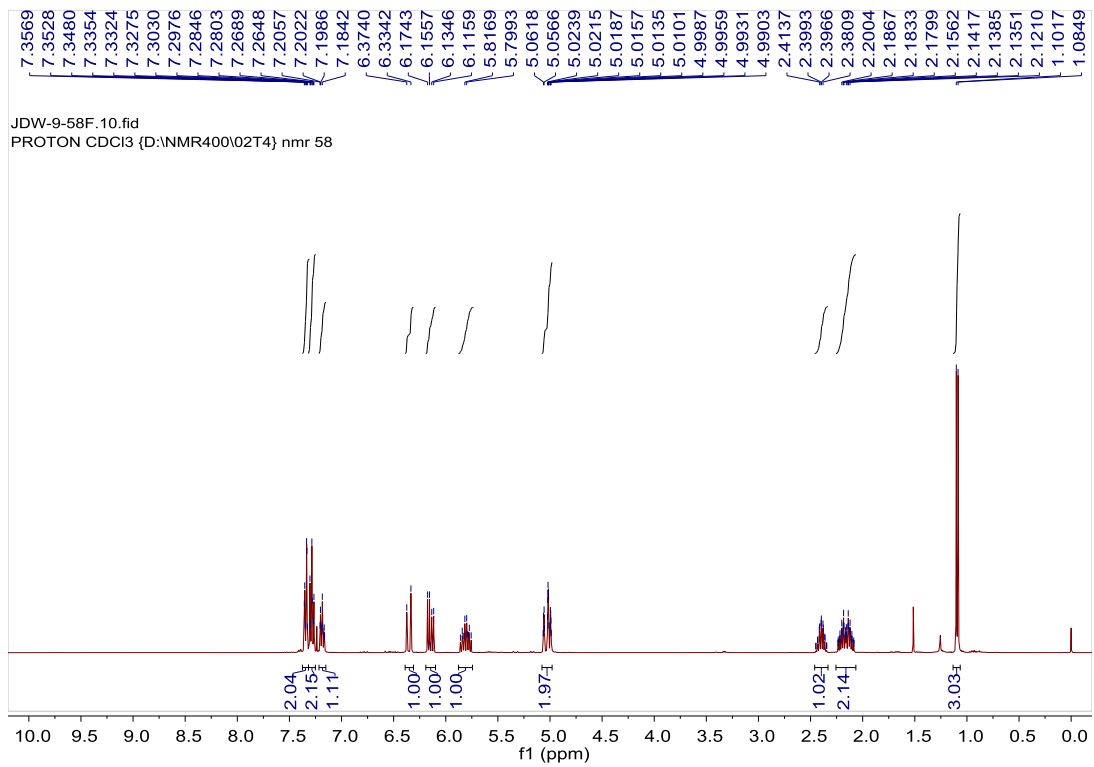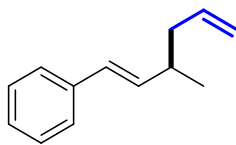

**3a** <sup>1</sup>H NMR (400 MHz, CDCl<sub>3</sub>)  
<sup>13</sup>C NMR (100 MHz, CDCl<sub>3</sub>)

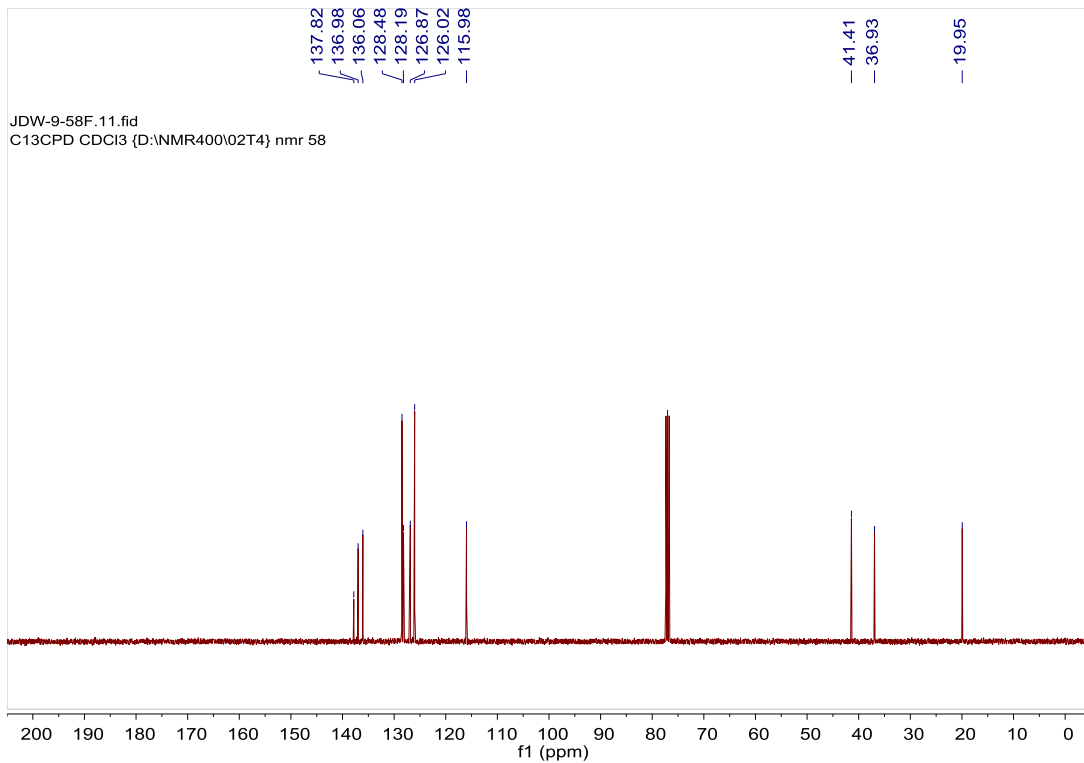

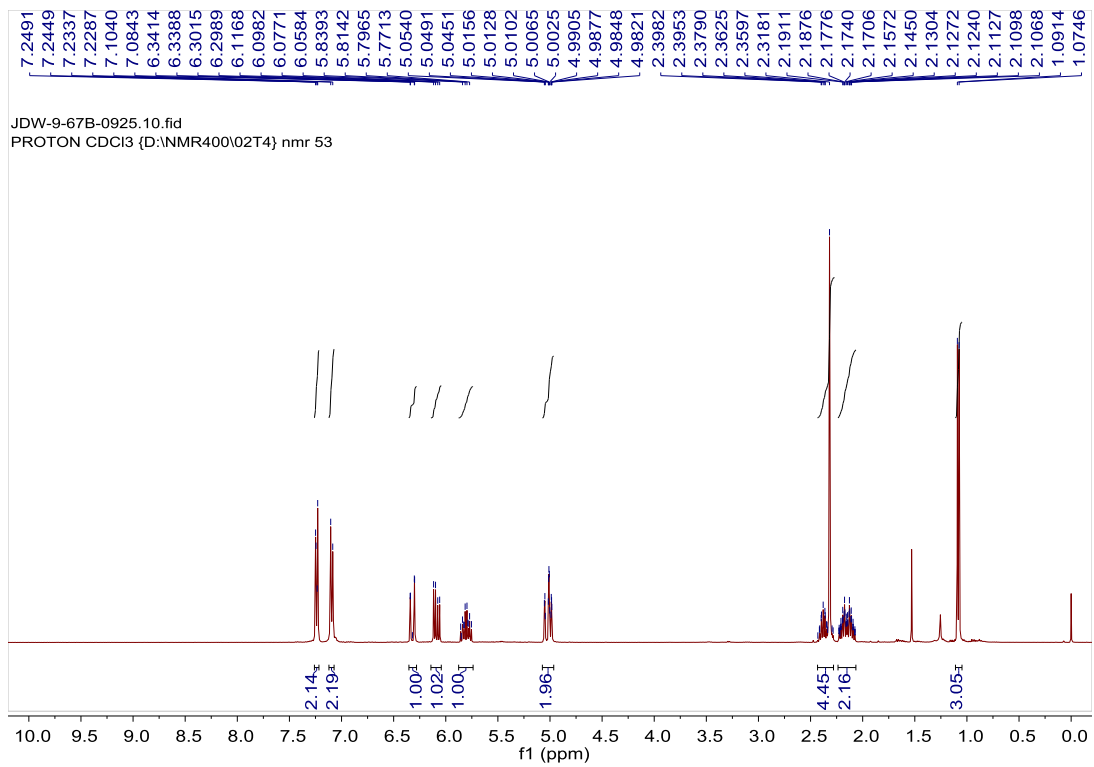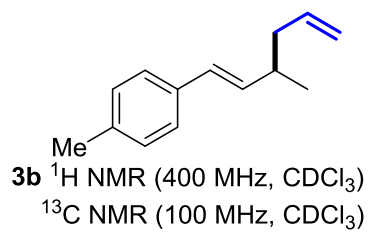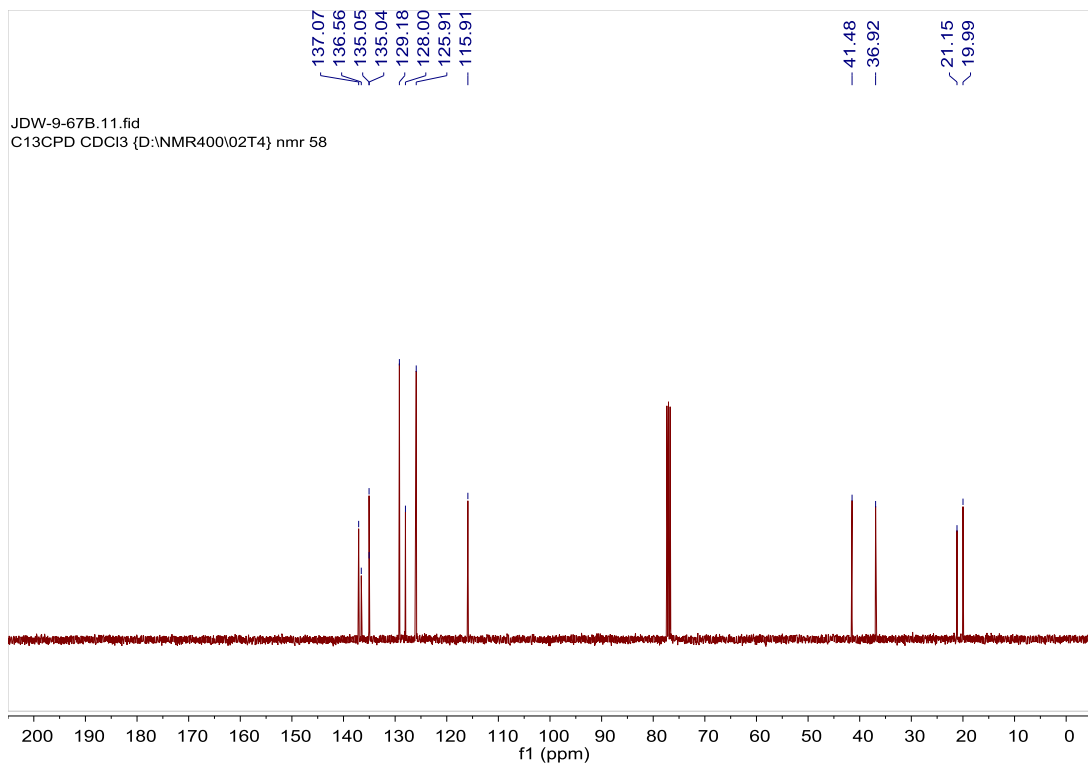

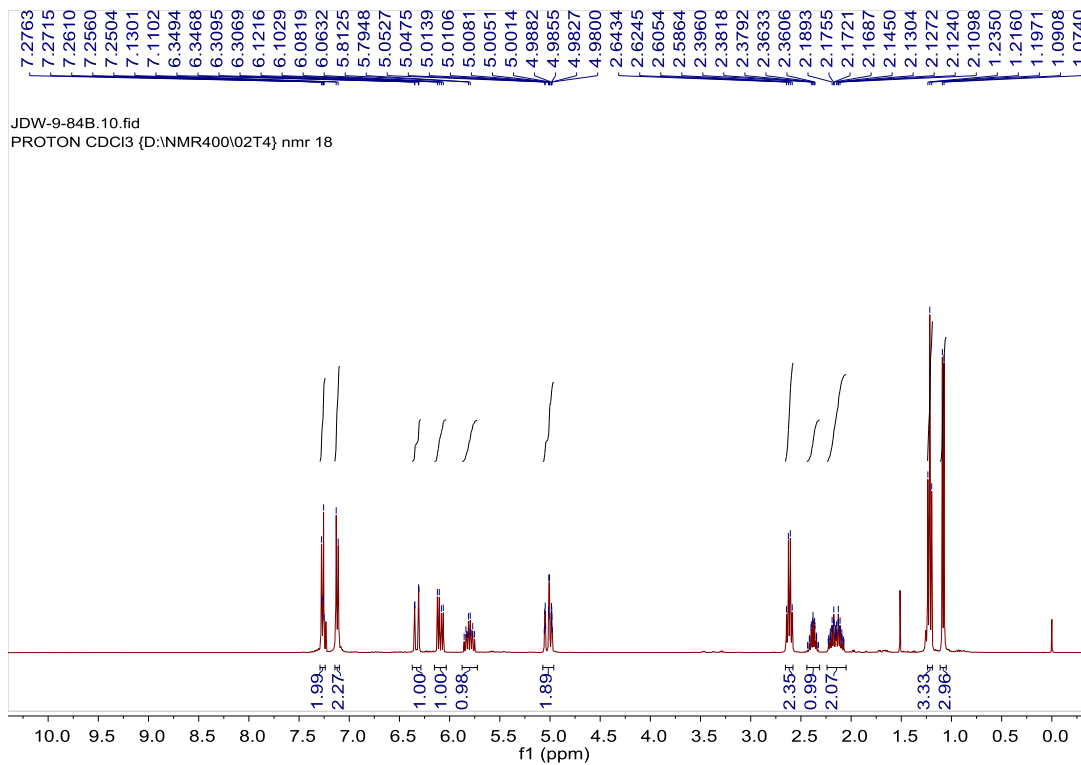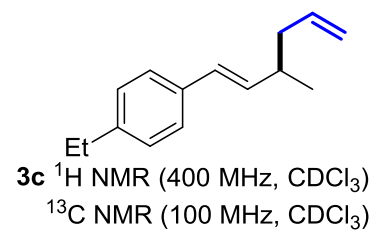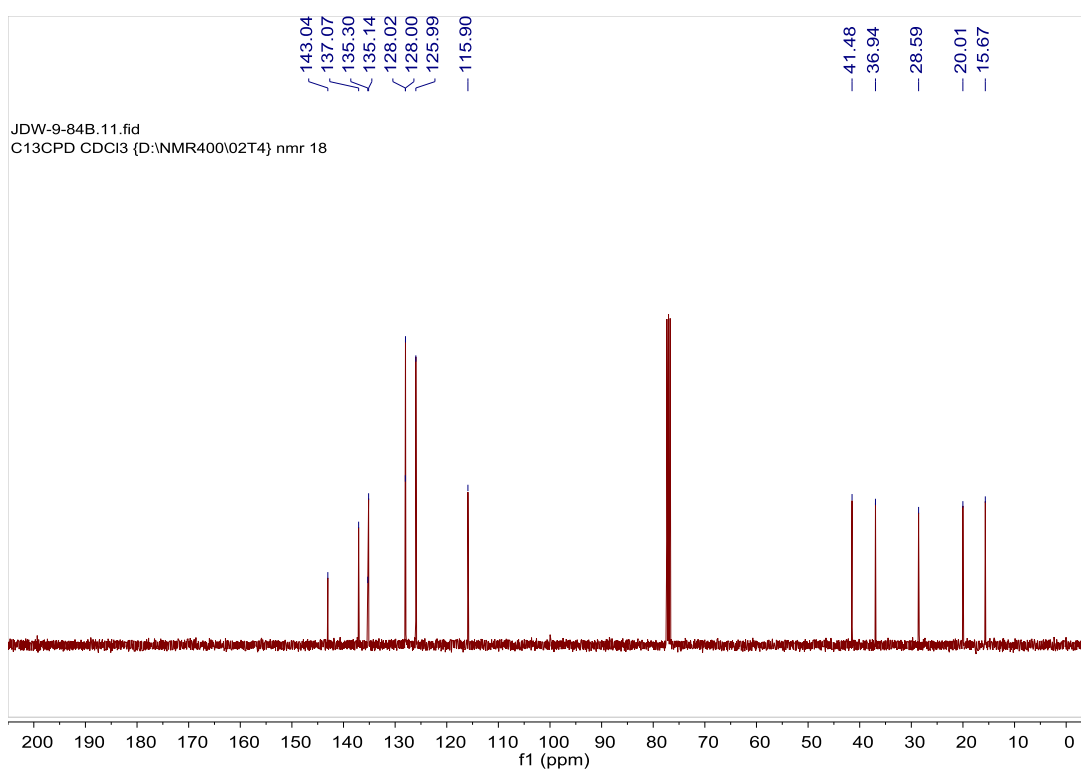

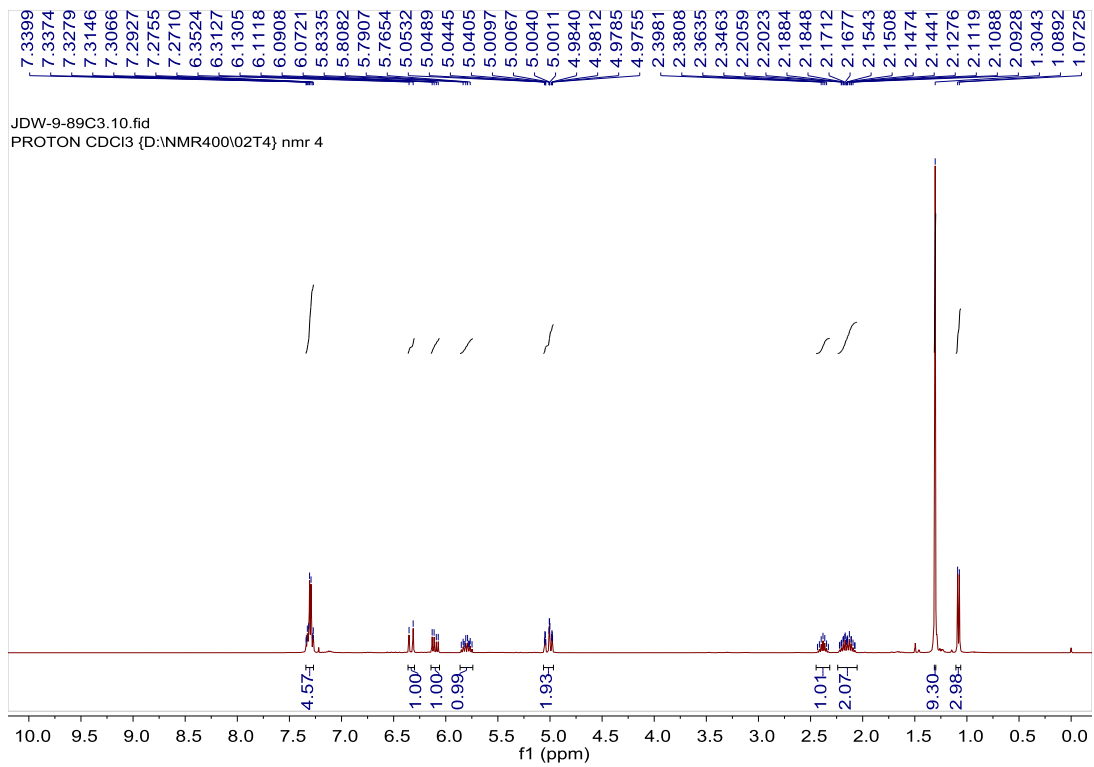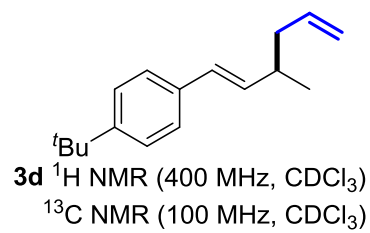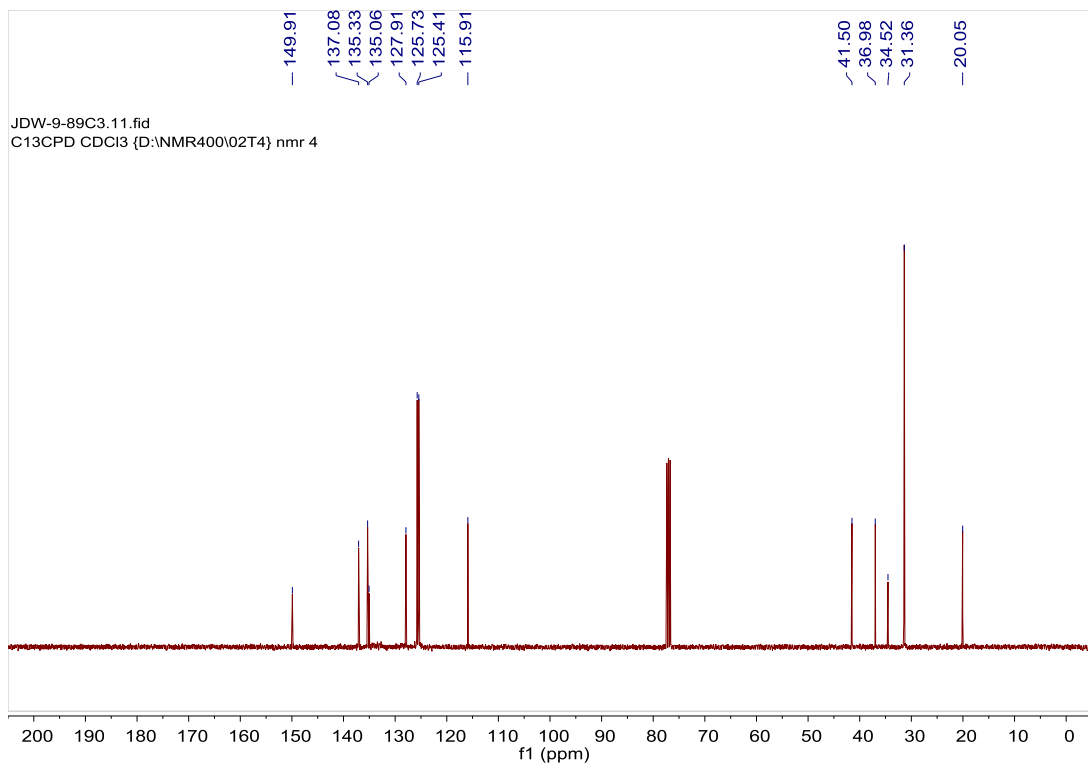

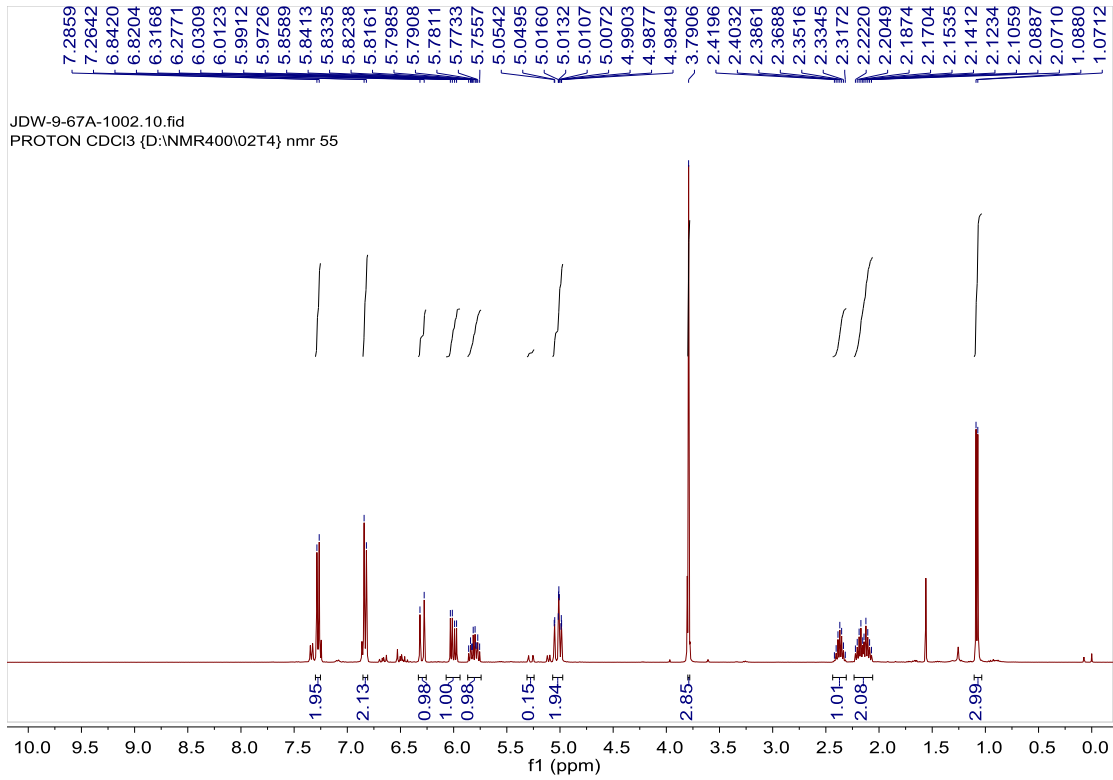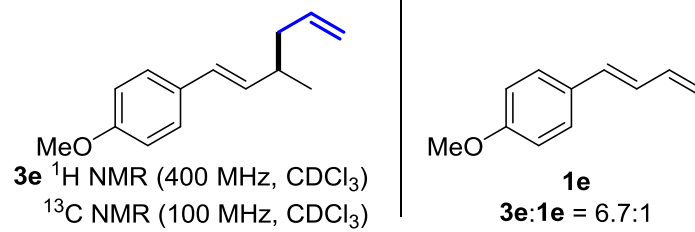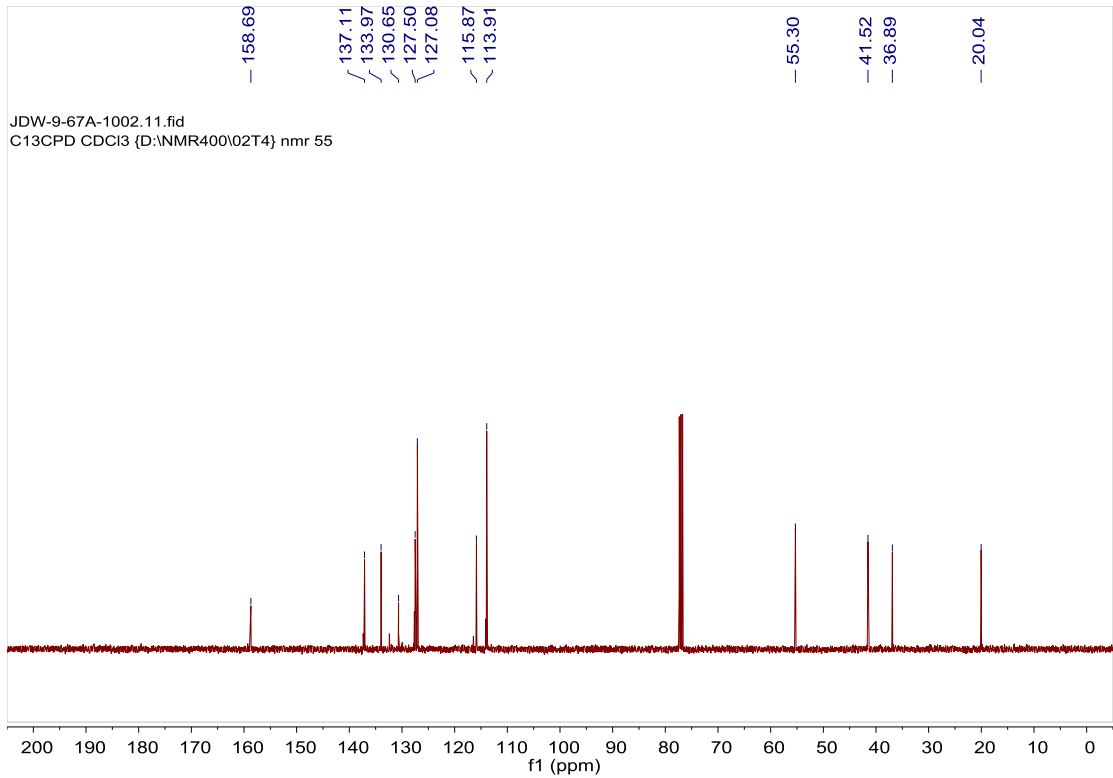

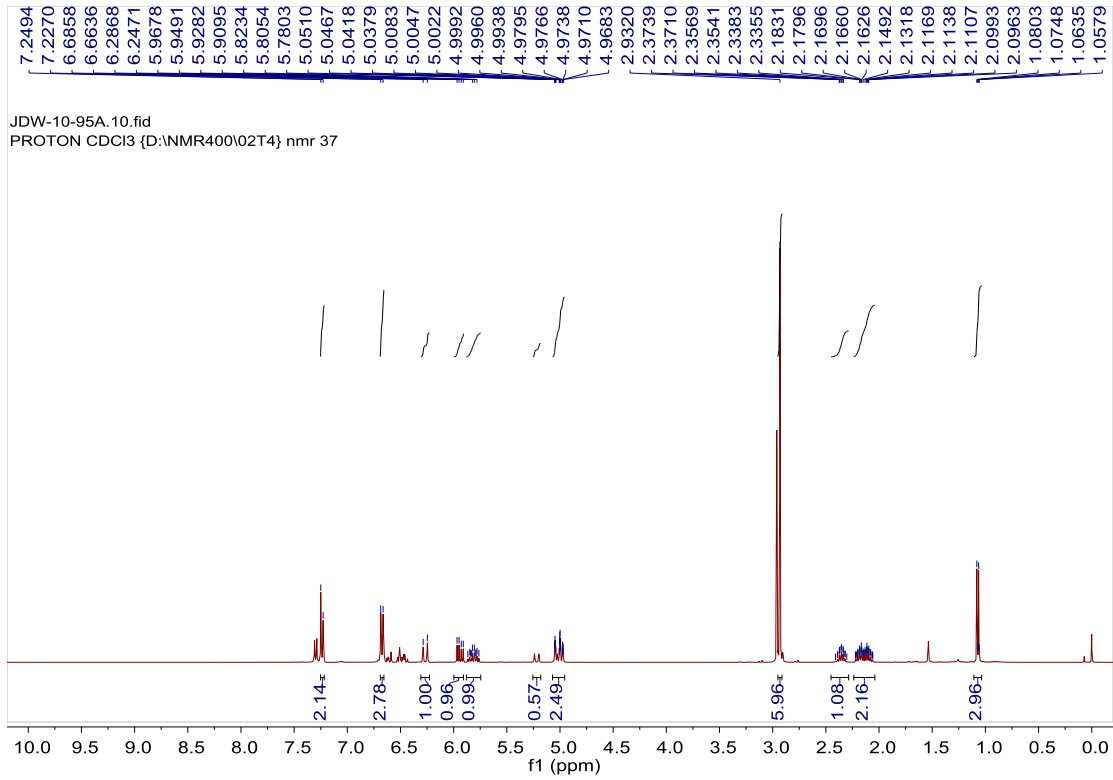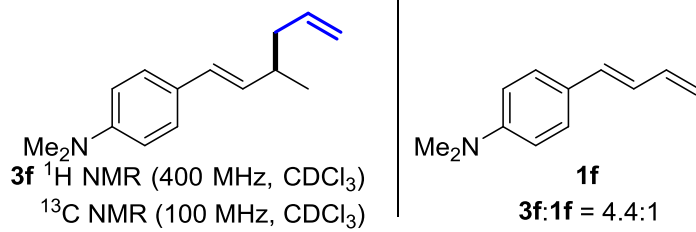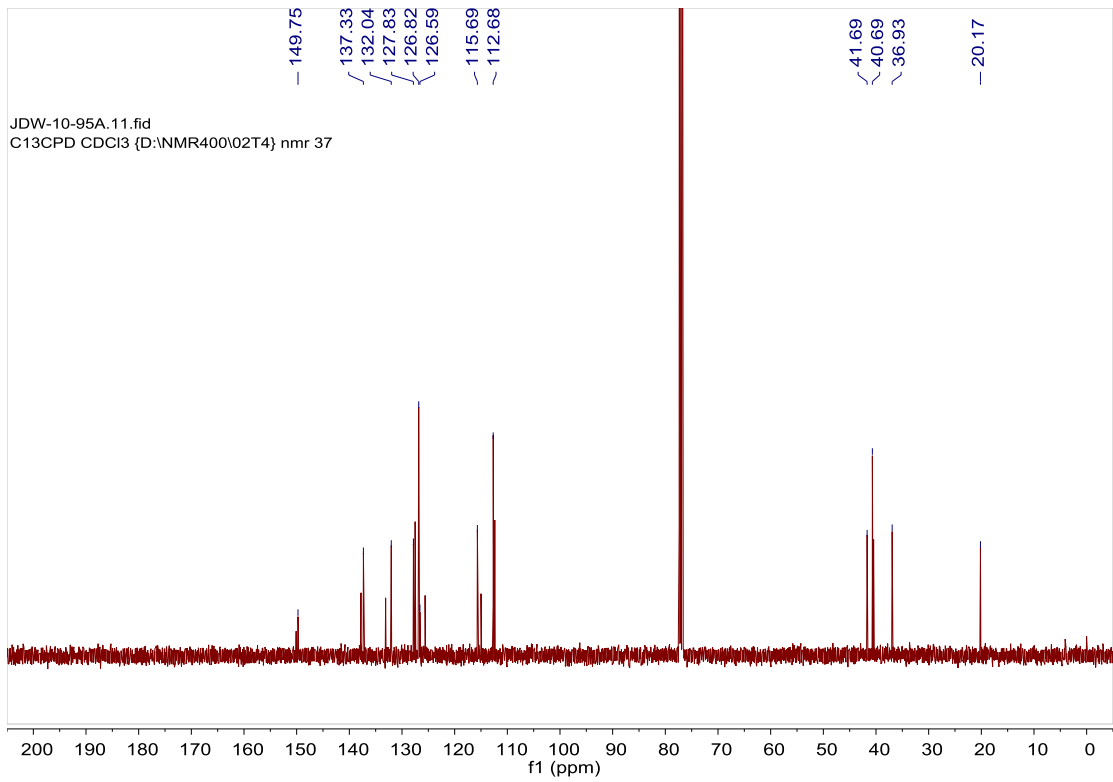



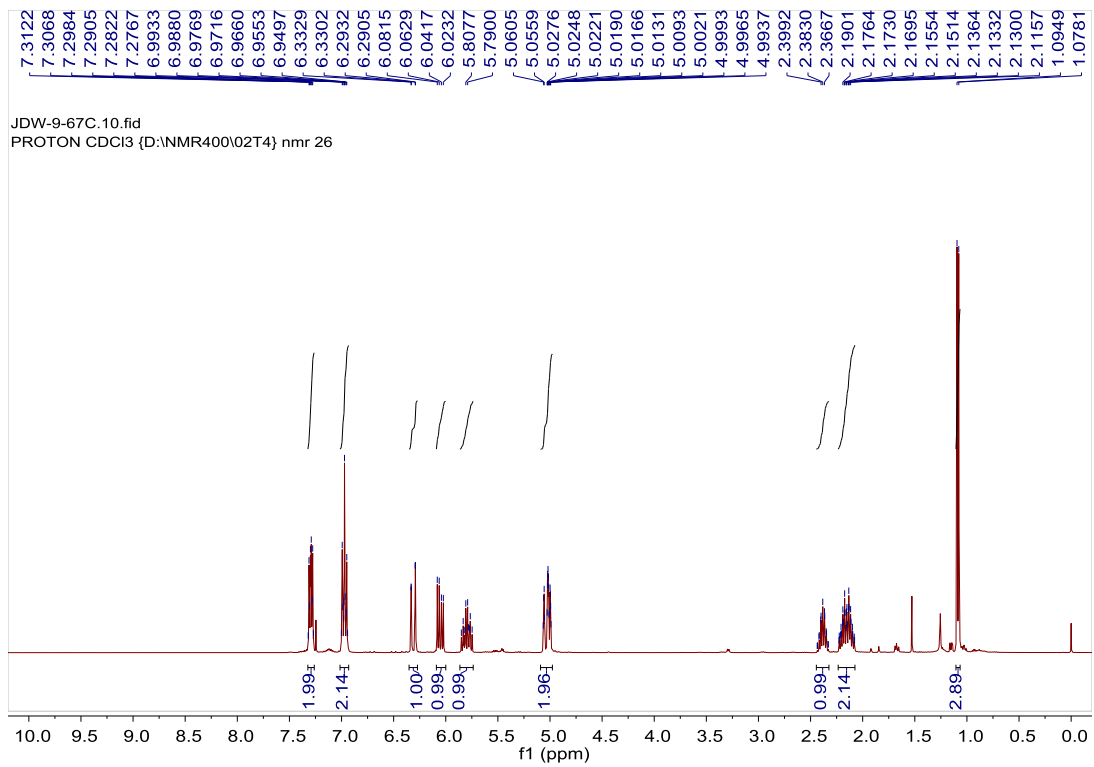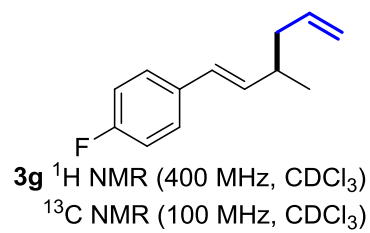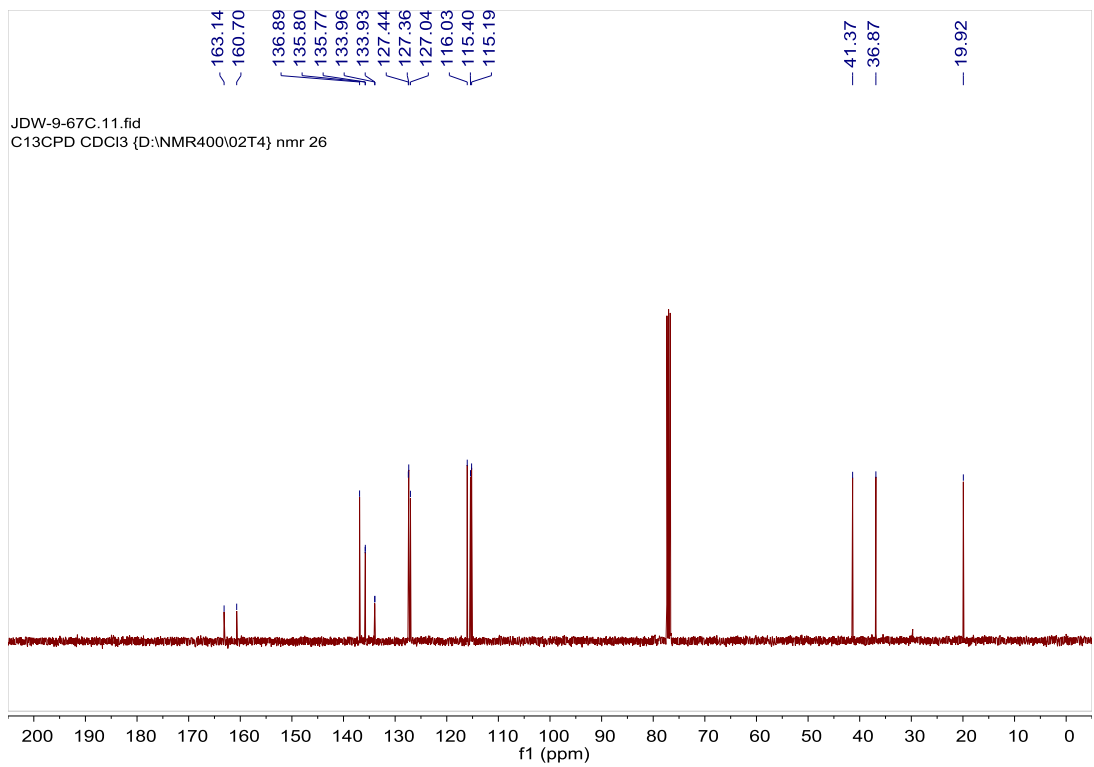

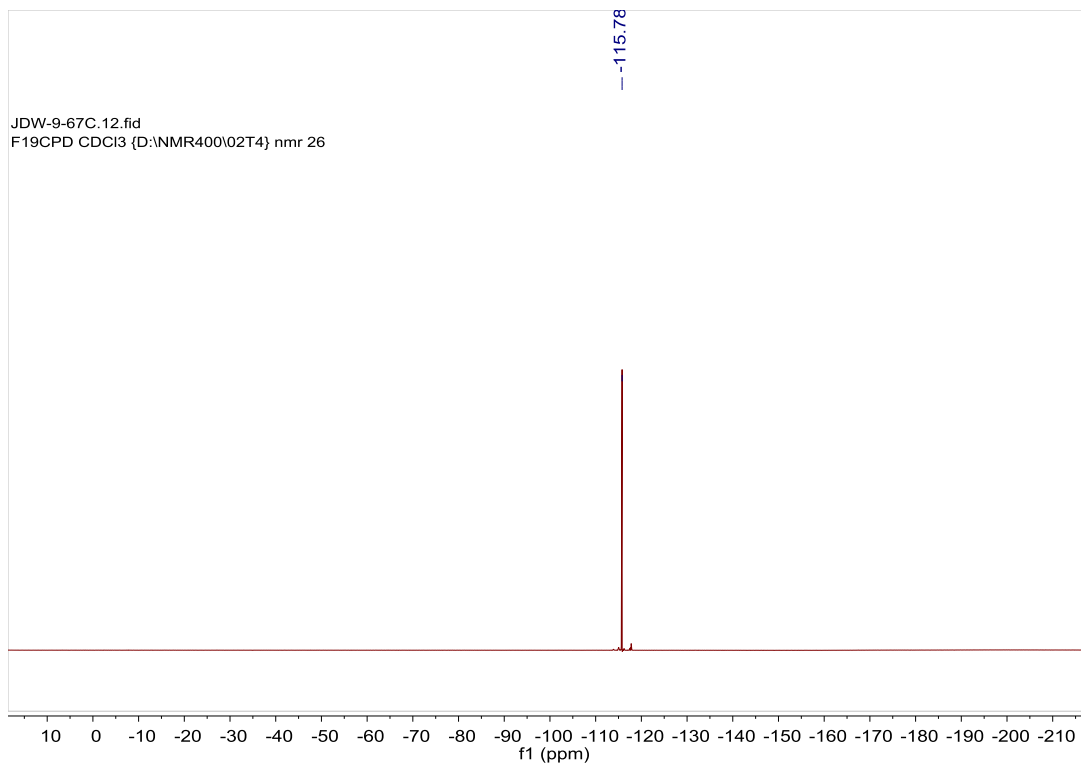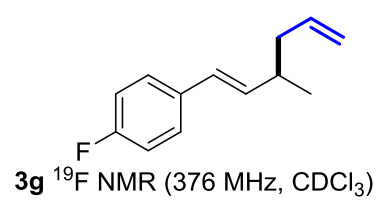

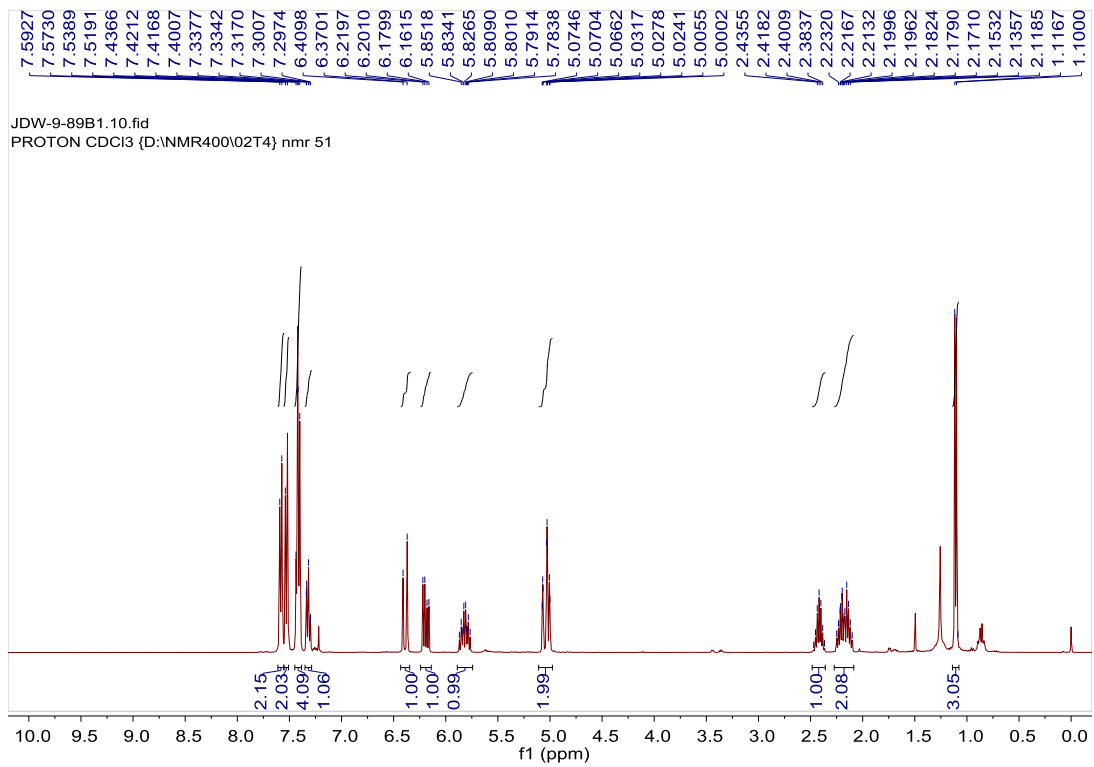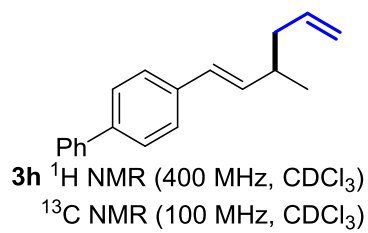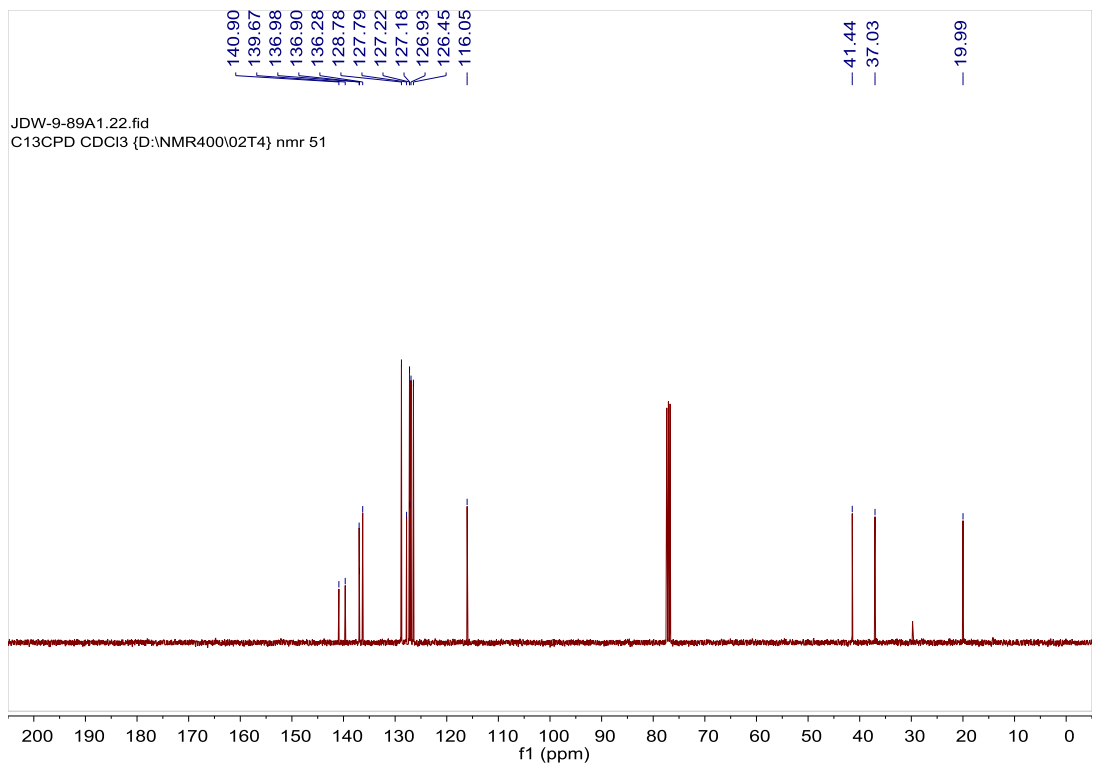

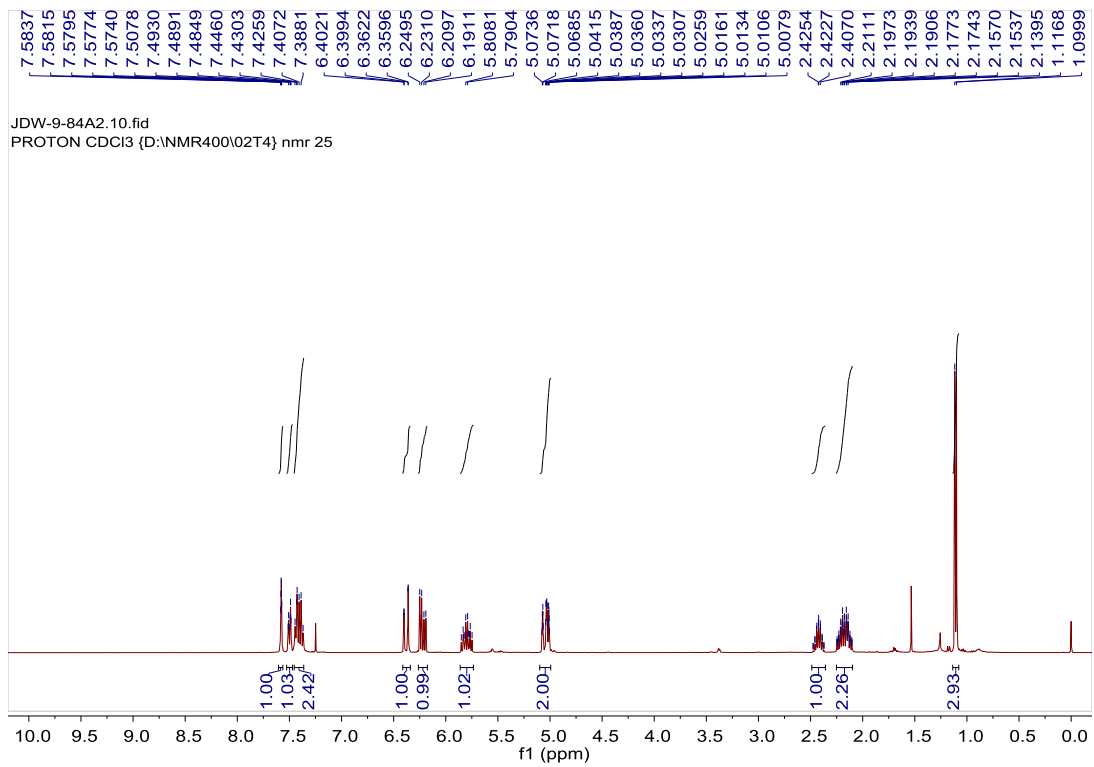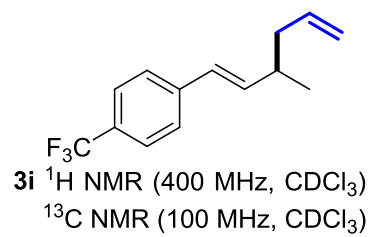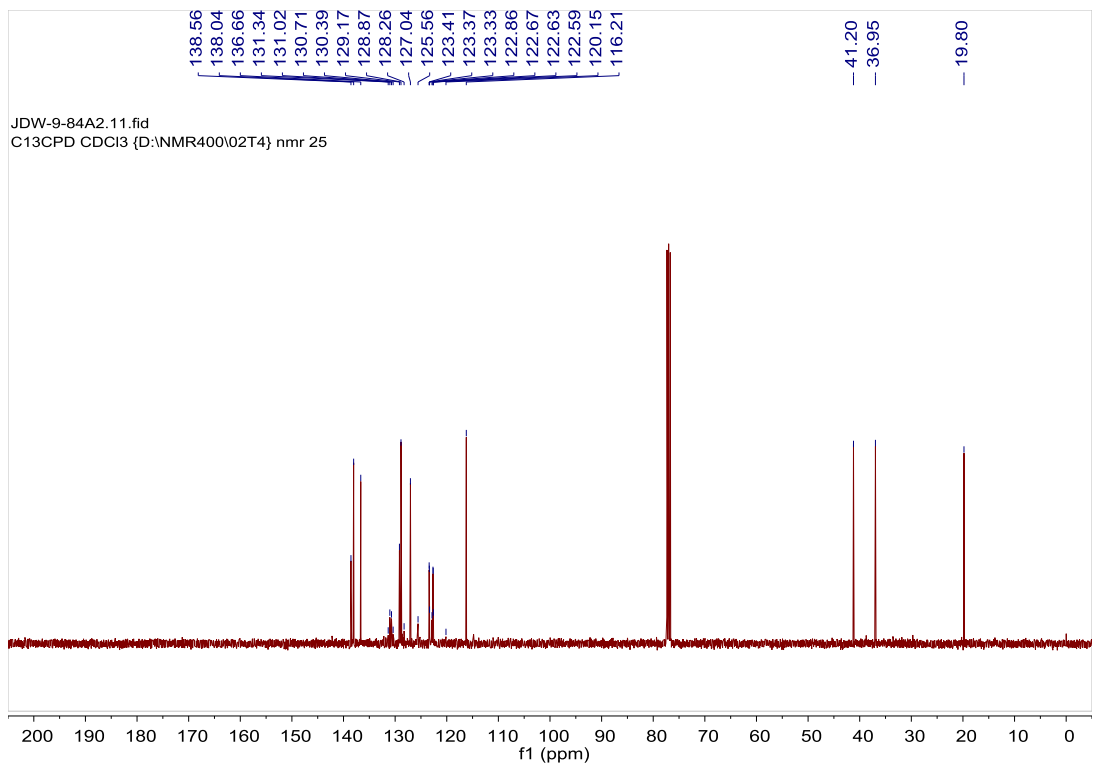

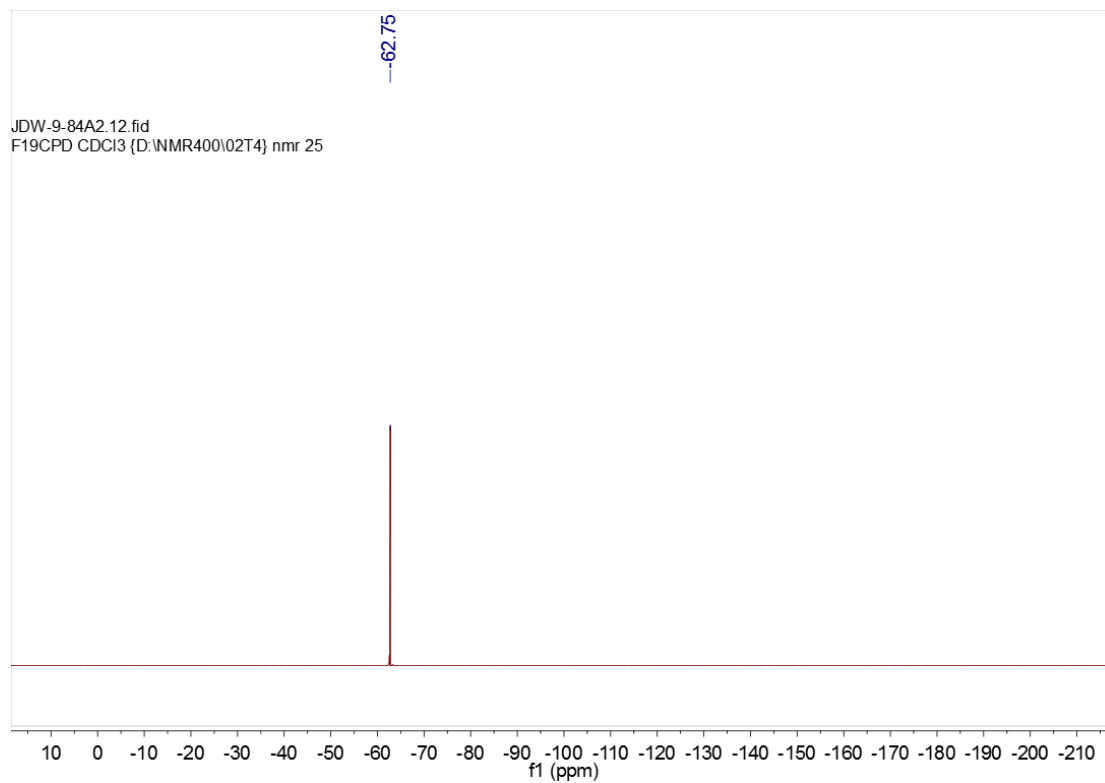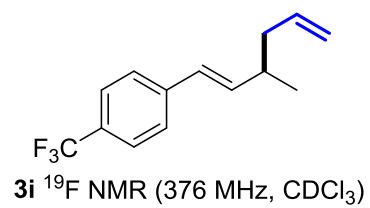

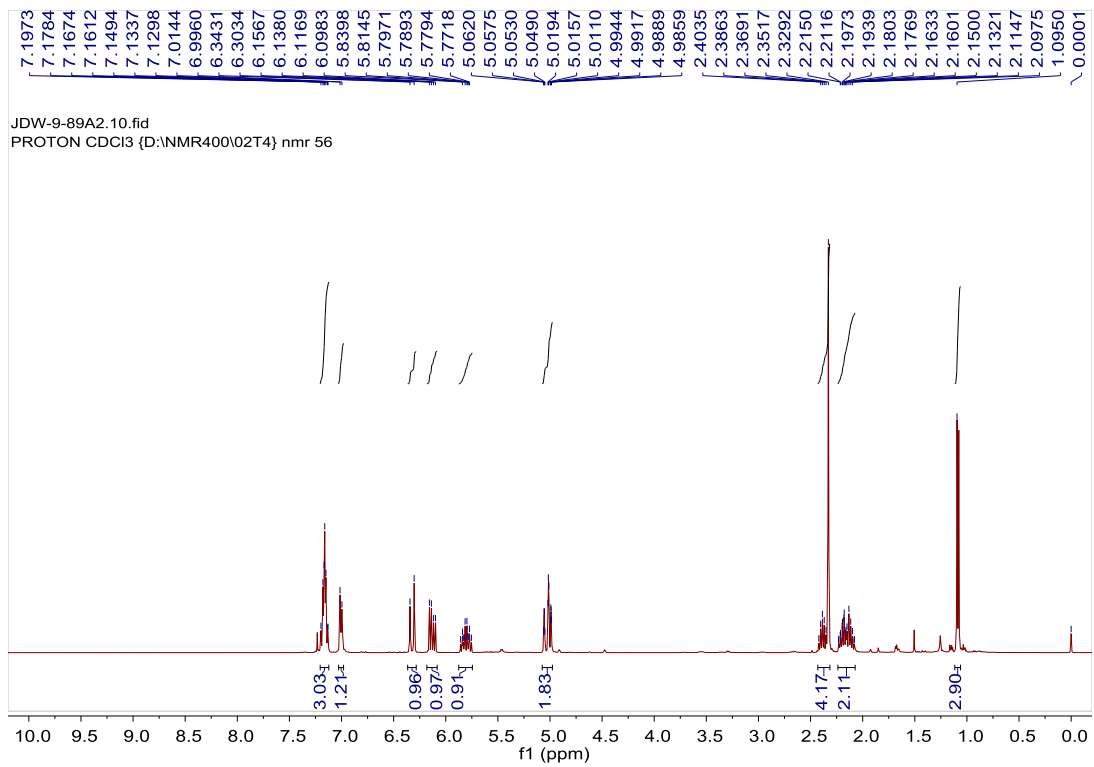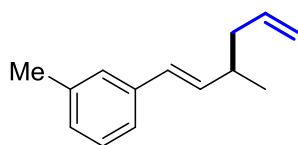

**3j** <sup>1</sup>H NMR (400 MHz, CDCl<sub>3</sub>)  
<sup>13</sup>C NMR (100 MHz, CDCl<sub>3</sub>)

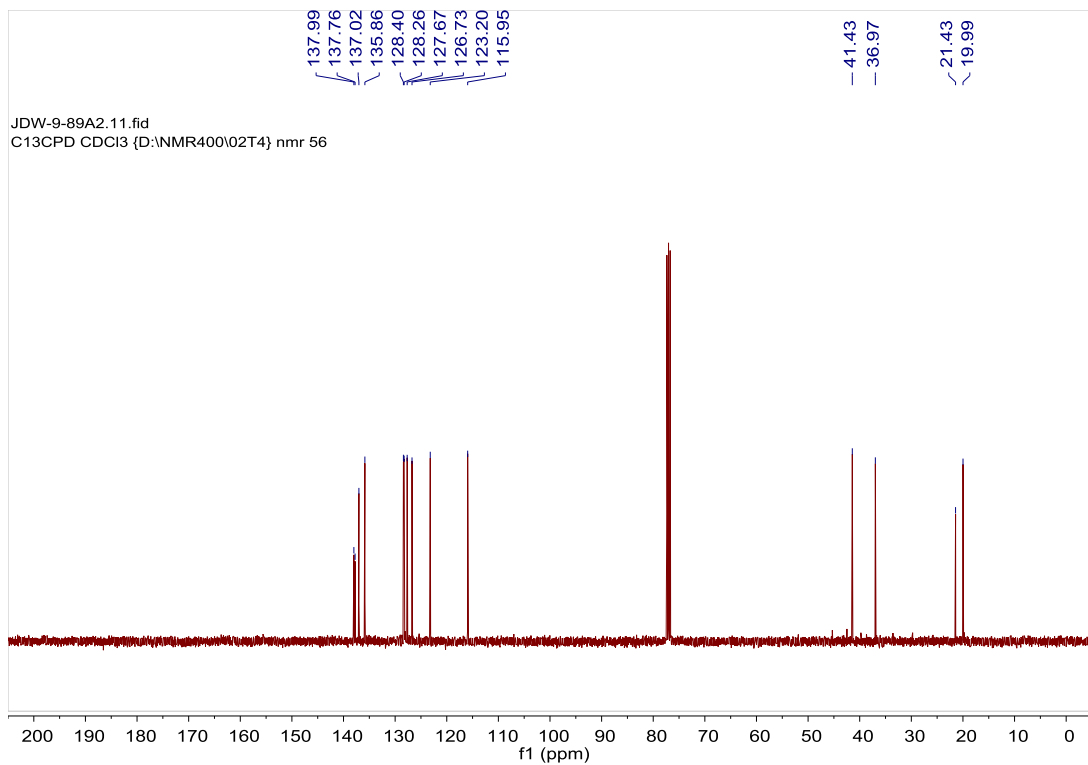

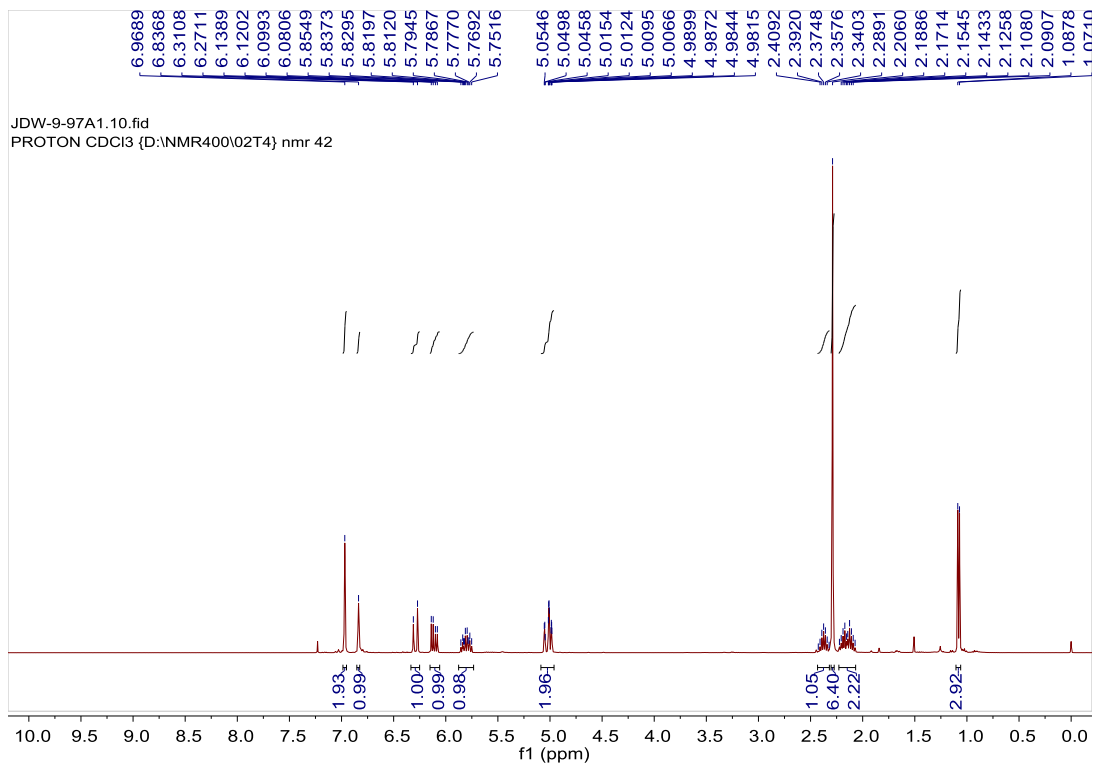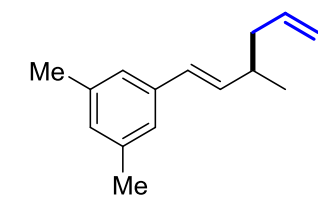

**3k** <sup>1</sup>H NMR (400 MHz, CDCl<sub>3</sub>)  
<sup>13</sup>C NMR (100 MHz, CDCl<sub>3</sub>)

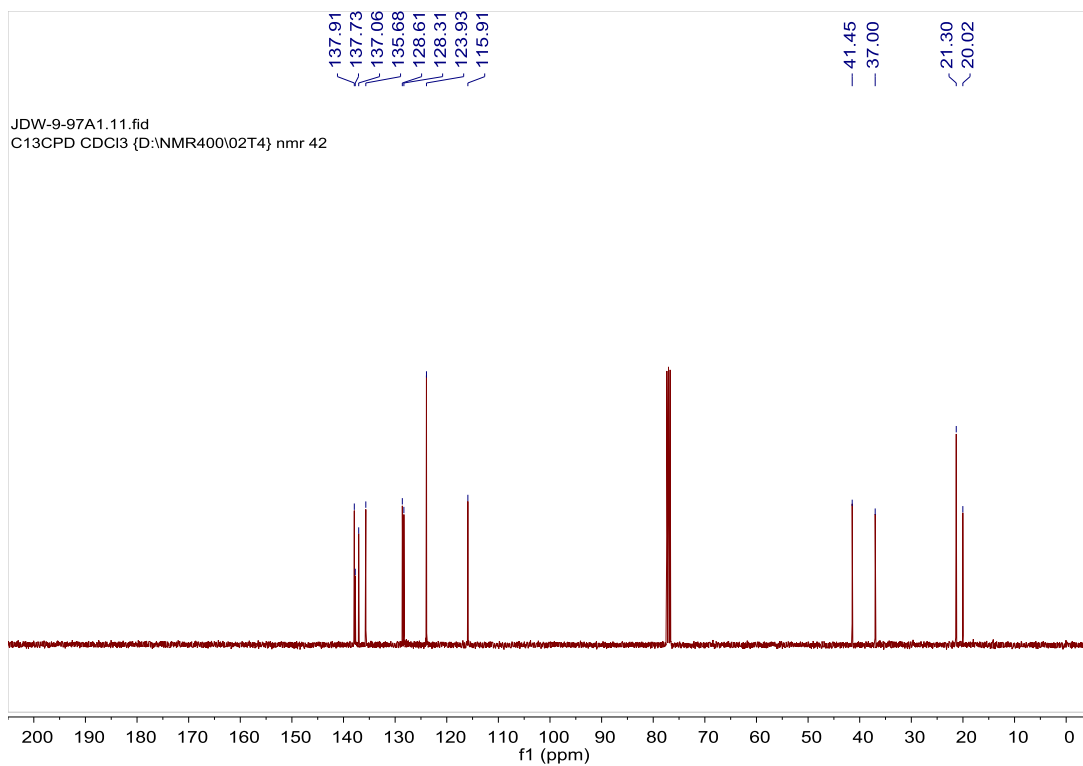

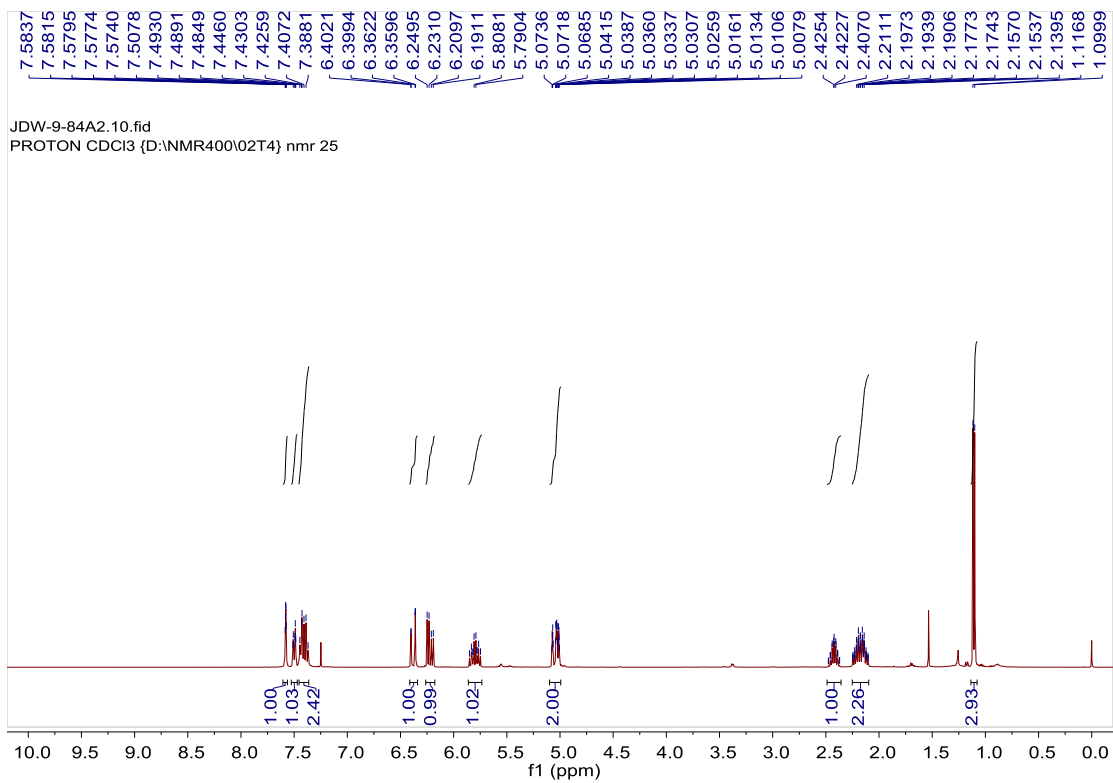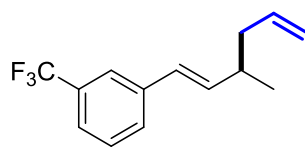

**3i**  $^1\text{H}$  NMR (400 MHz,  $\text{CDCl}_3$ )  
 $^{13}\text{C}$  NMR (100 MHz,  $\text{CDCl}_3$ )

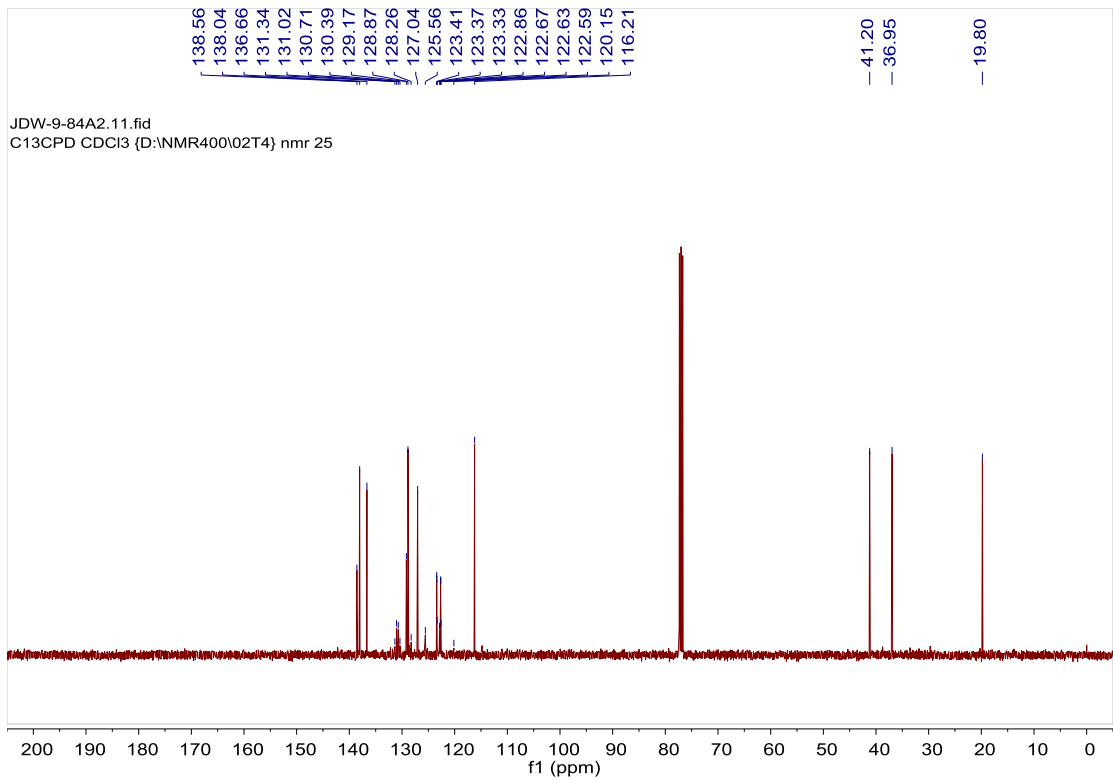



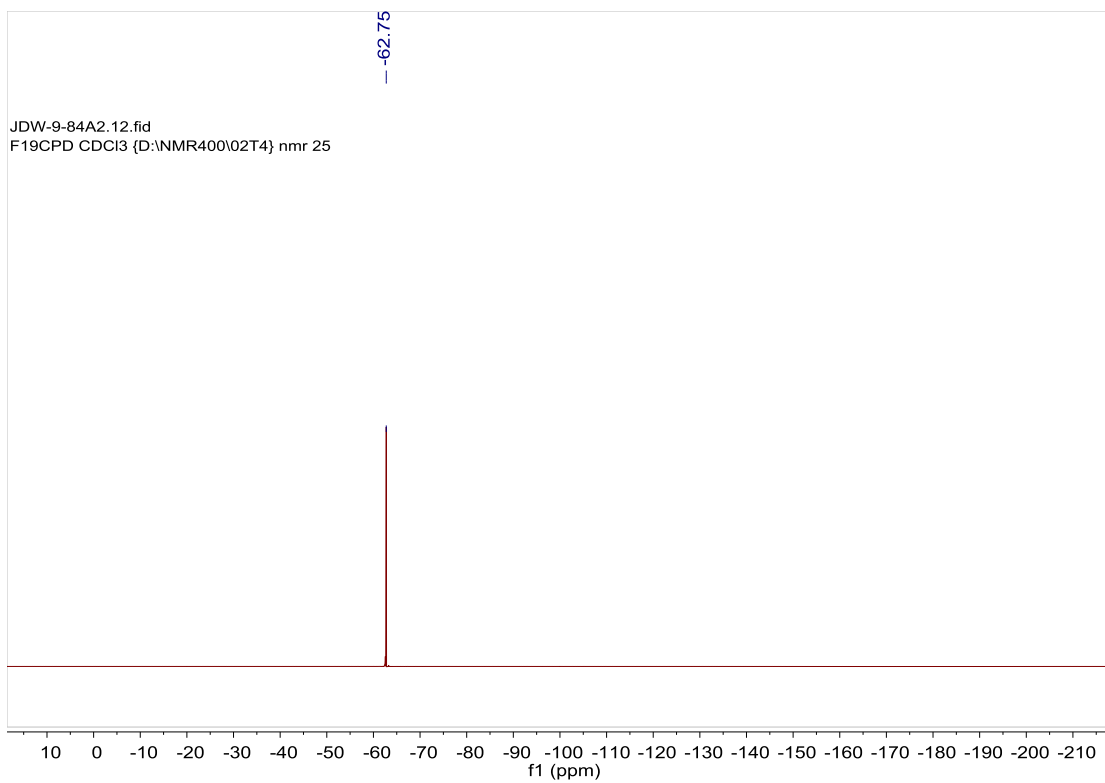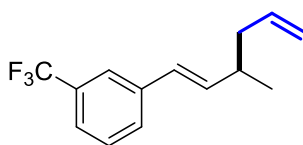

**31**  $^{19}\text{F}$  NMR (376 MHz,  $\text{CDCl}_3$ )

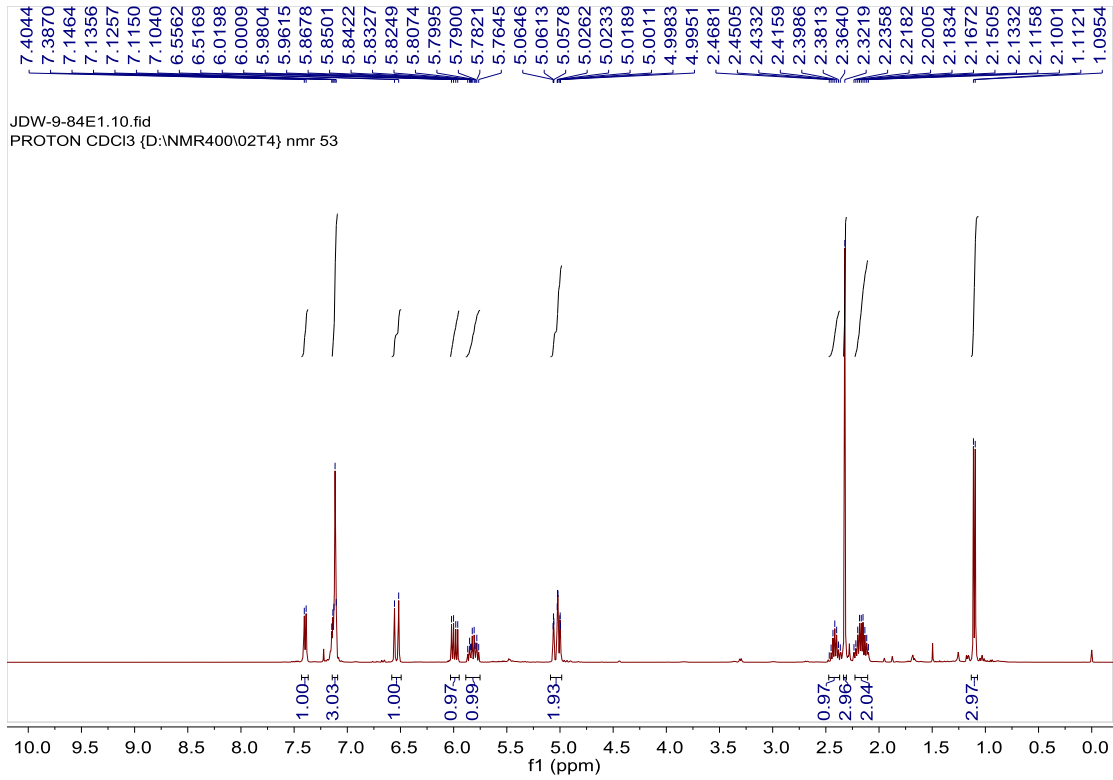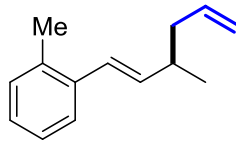

**3m**  $^1\text{H}$  NMR (400 MHz,  $\text{CDCl}_3$ )  
 $^{13}\text{C}$  NMR (100 MHz,  $\text{CDCl}_3$ )

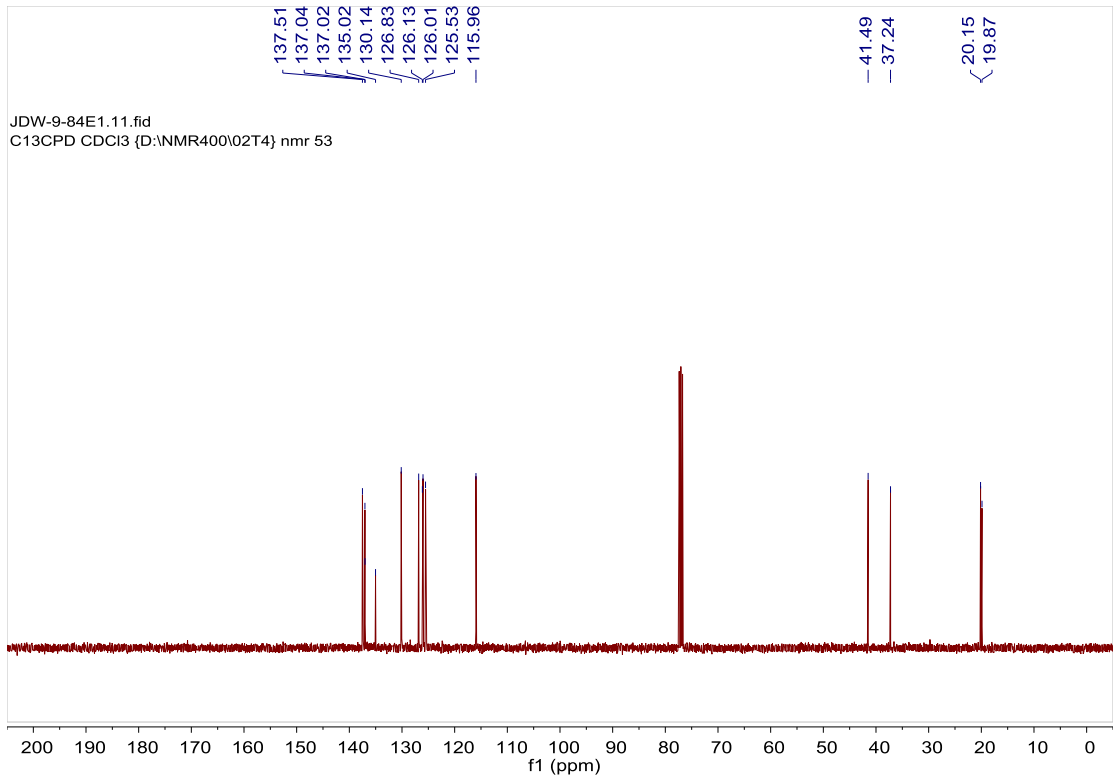

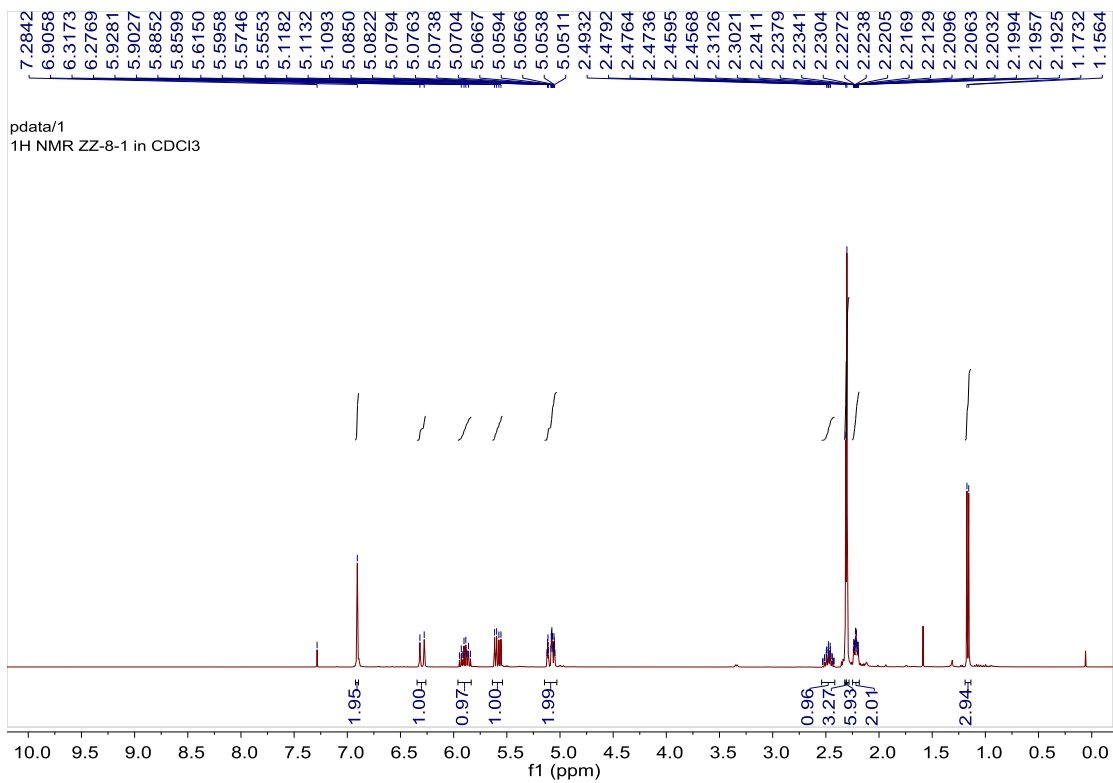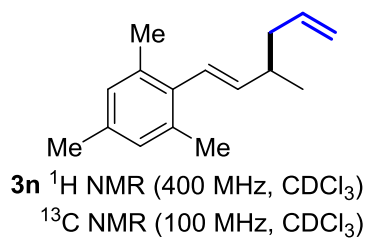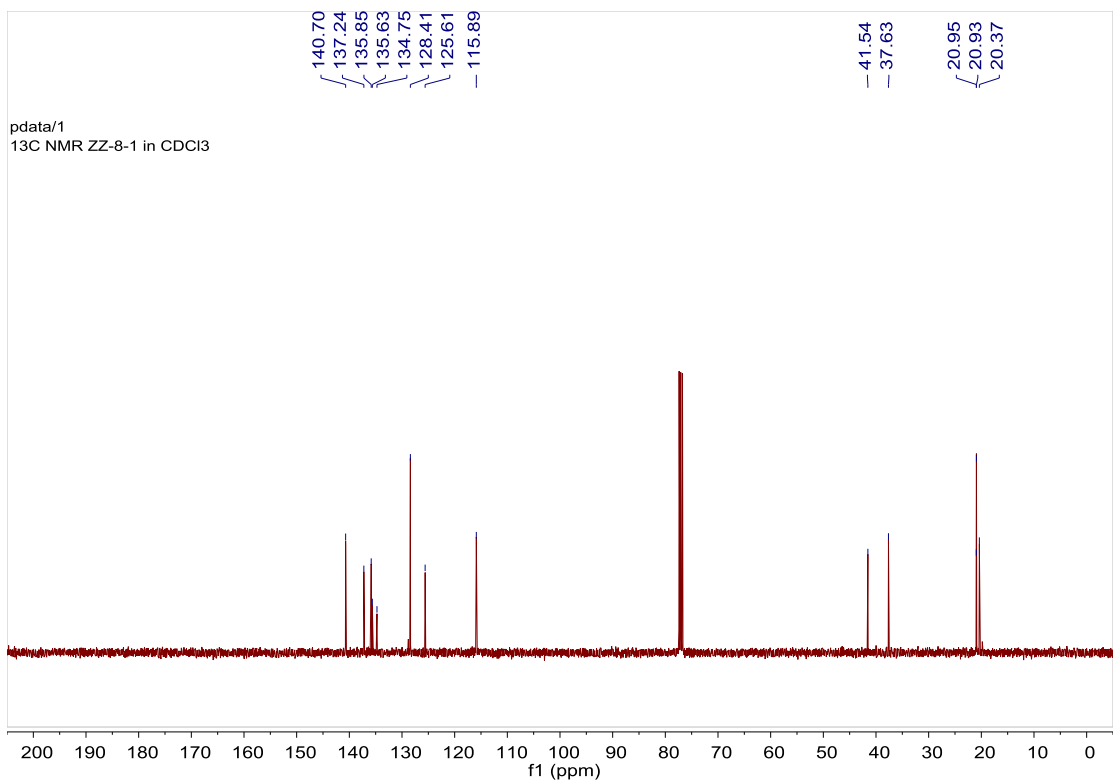

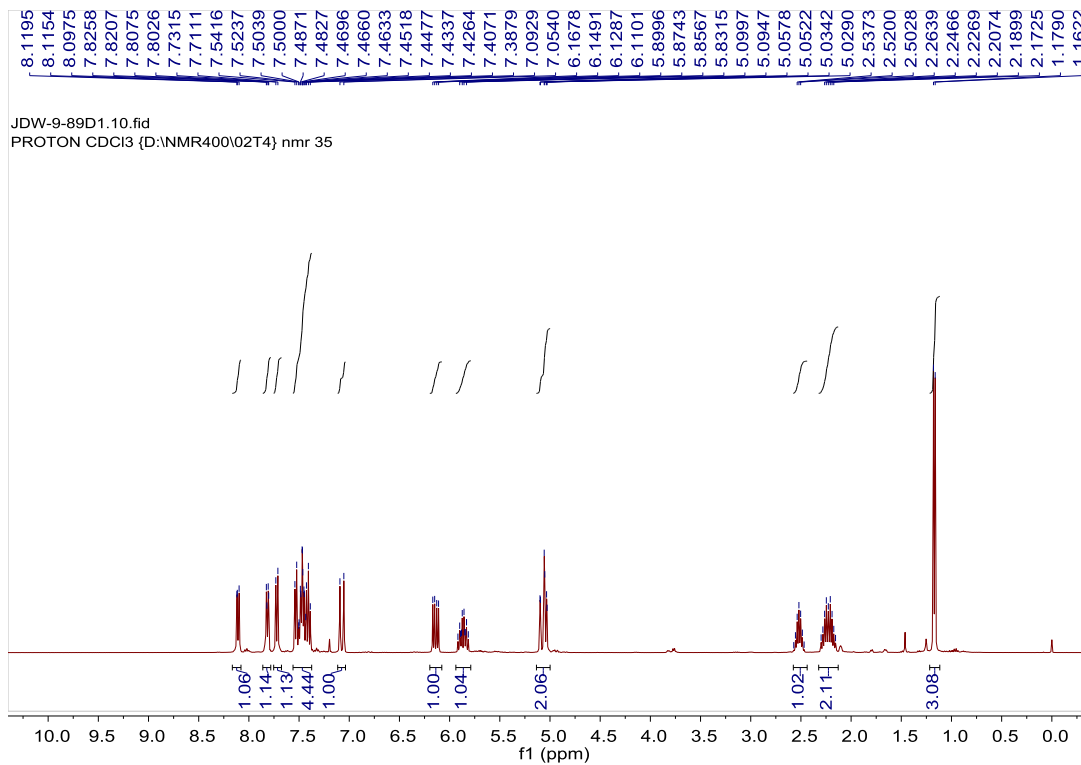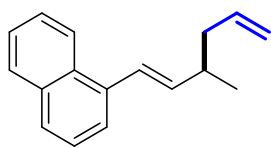

**3o**  $^1\text{H}$  NMR (400 MHz,  $\text{CDCl}_3$ )  
 $^{13}\text{C}$  NMR (100 MHz,  $\text{CDCl}_3$ )

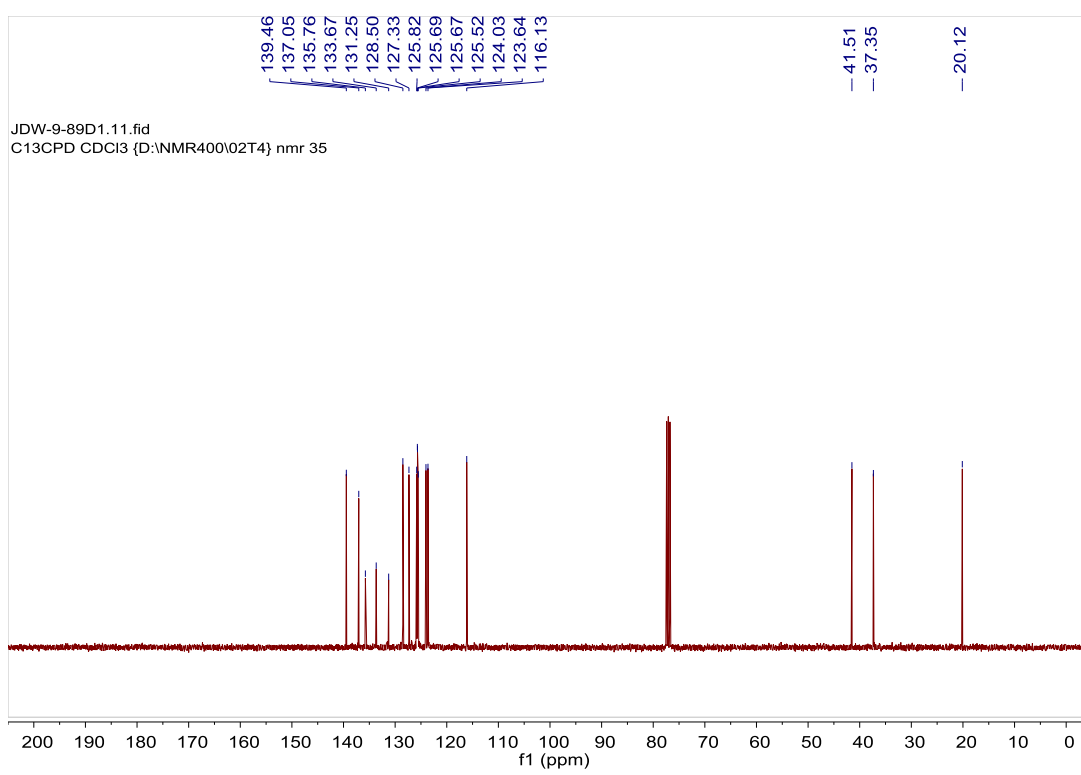

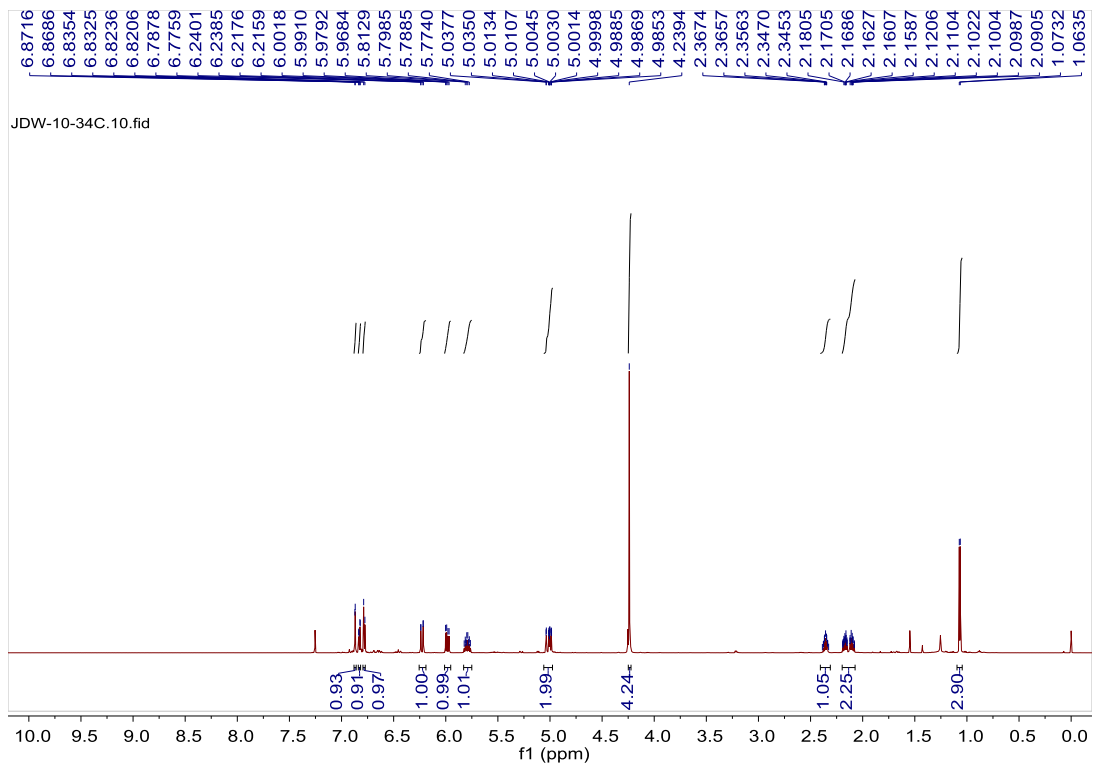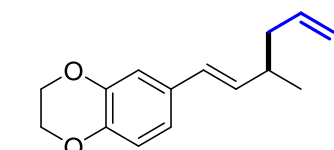

**3p**  $^1\text{H}$  NMR (400 MHz,  $\text{CDCl}_3$ )

$^{13}\text{C}$  NMR (100 MHz,  $\text{CDCl}_3$ )

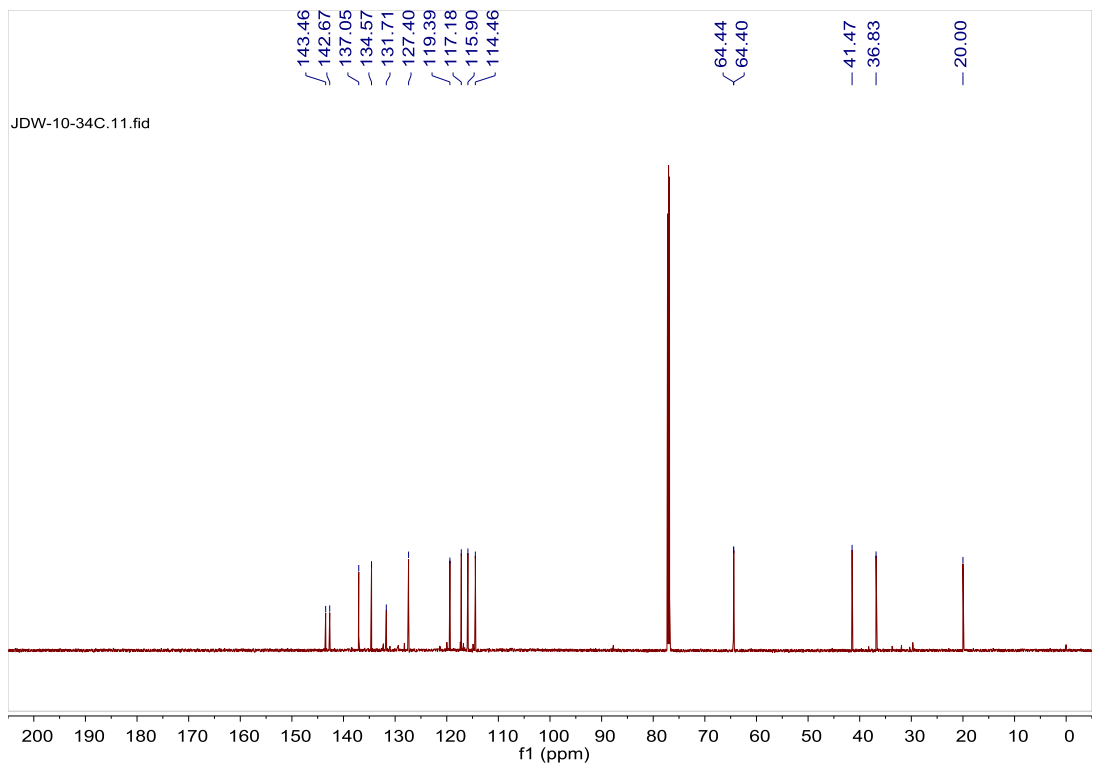

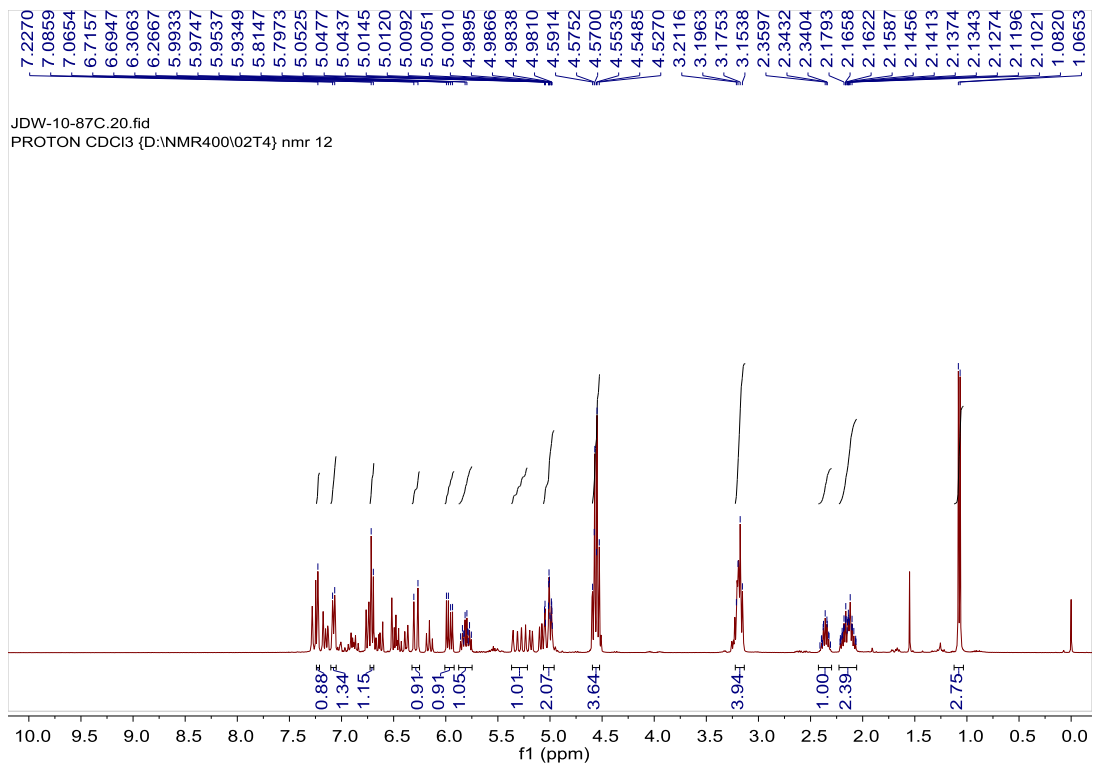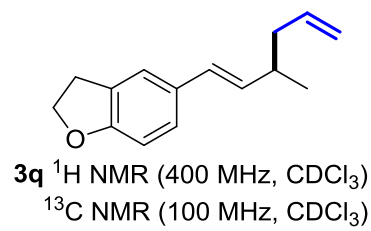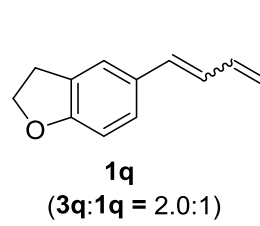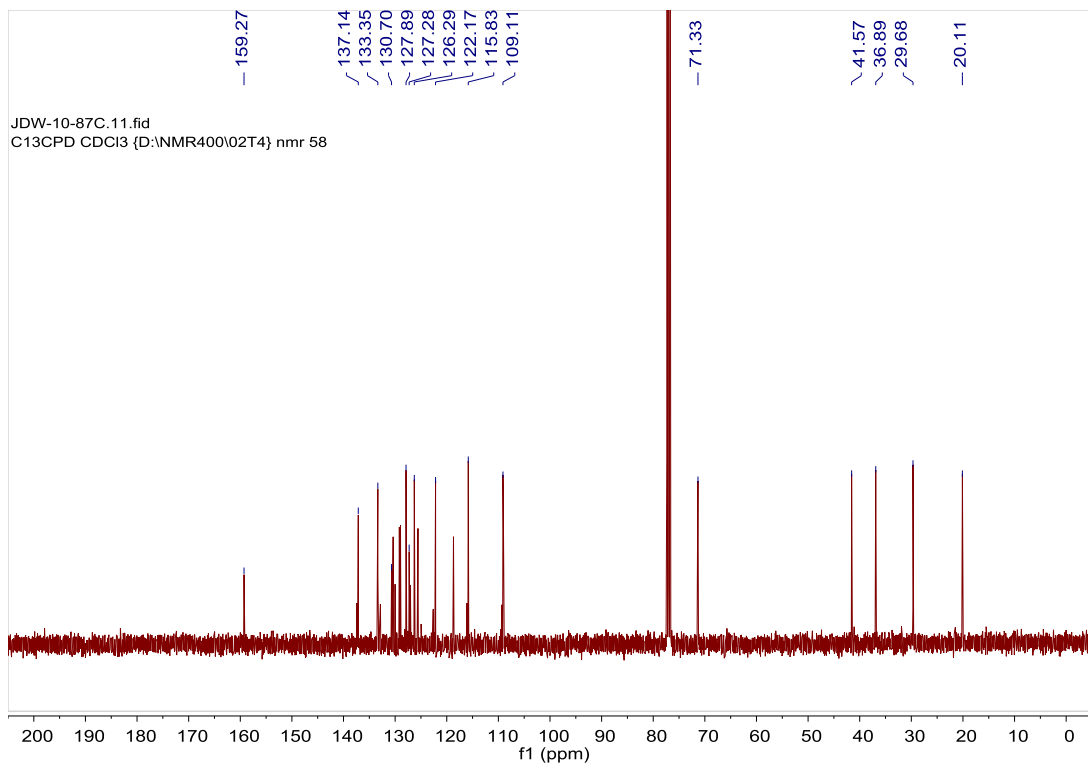

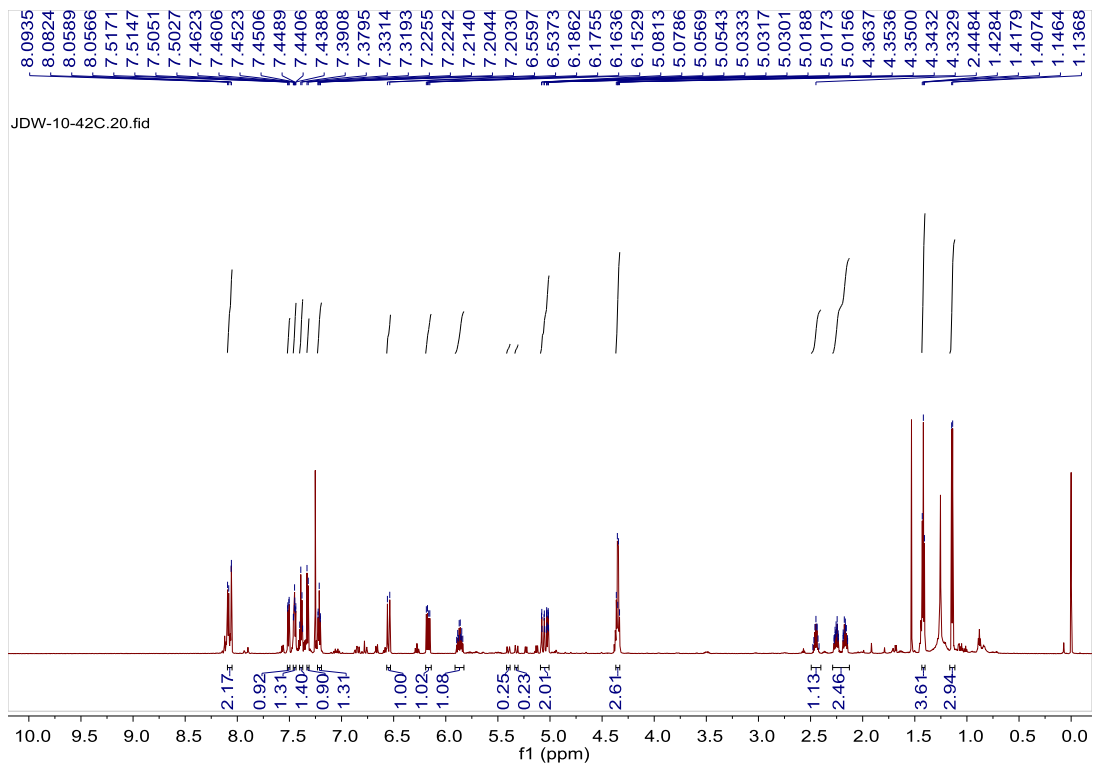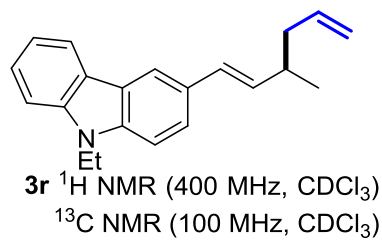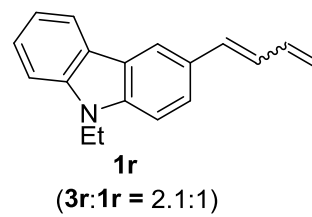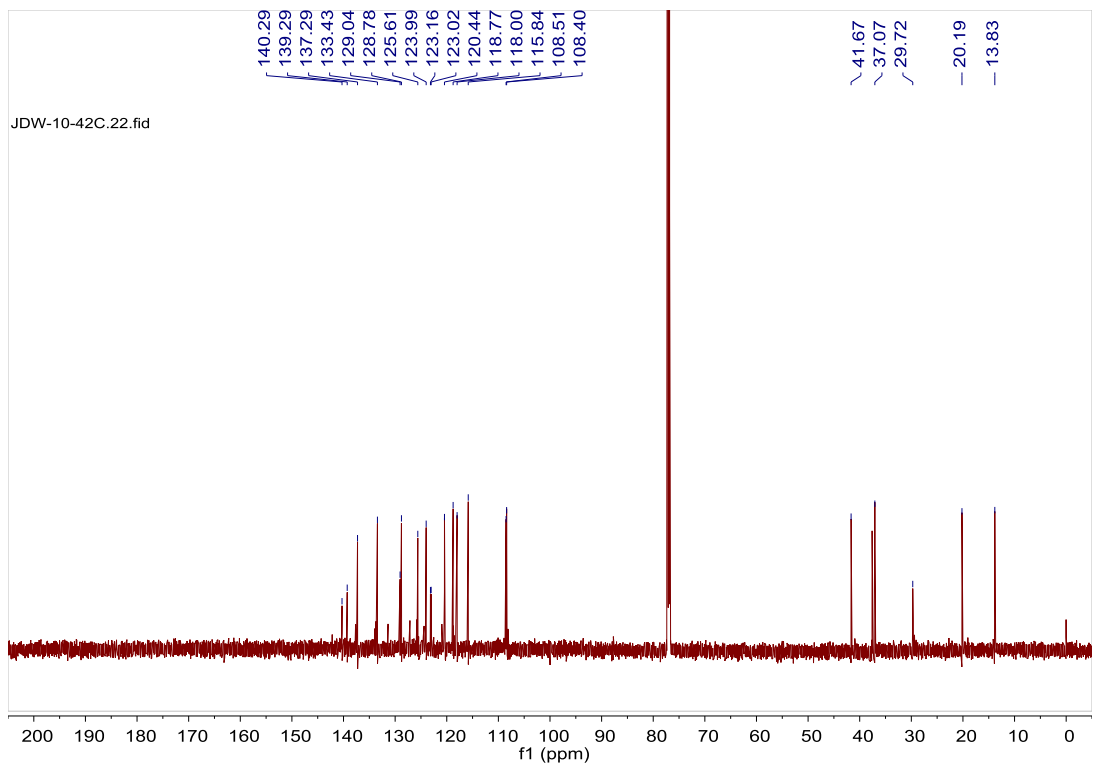

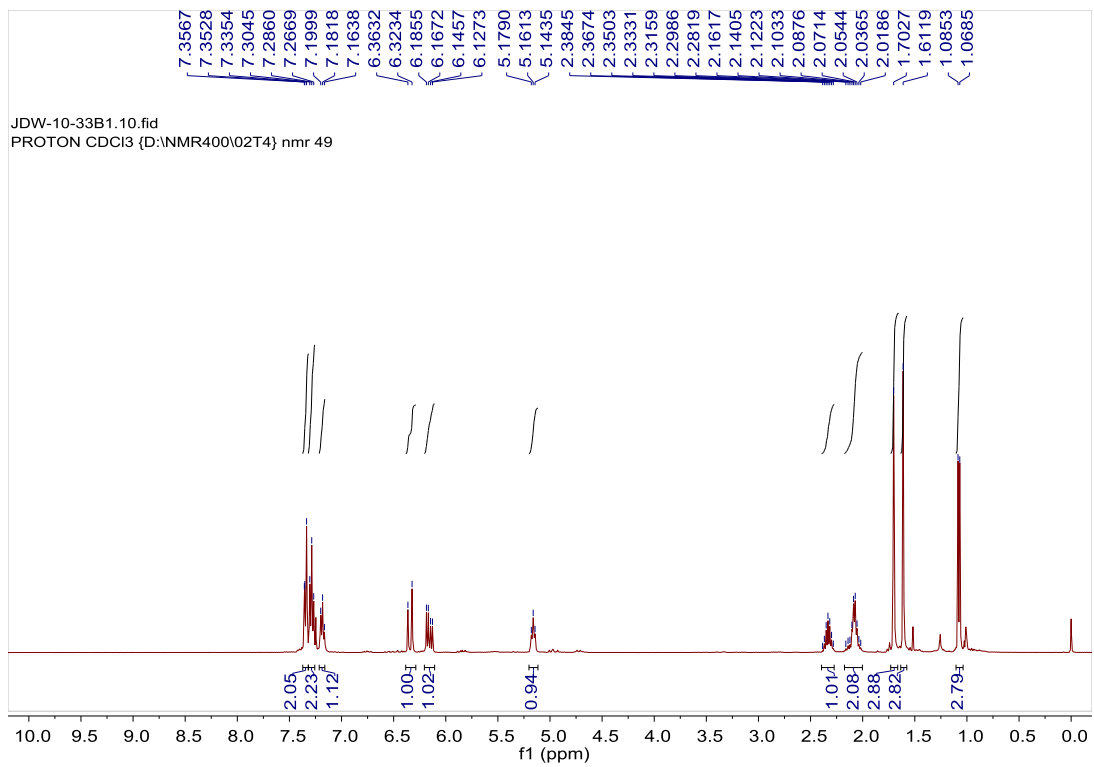

**3s** <sup>1</sup>H NMR (400 MHz, CDCl<sub>3</sub>)  
<sup>13</sup>C NMR (100 MHz, CDCl<sub>3</sub>)

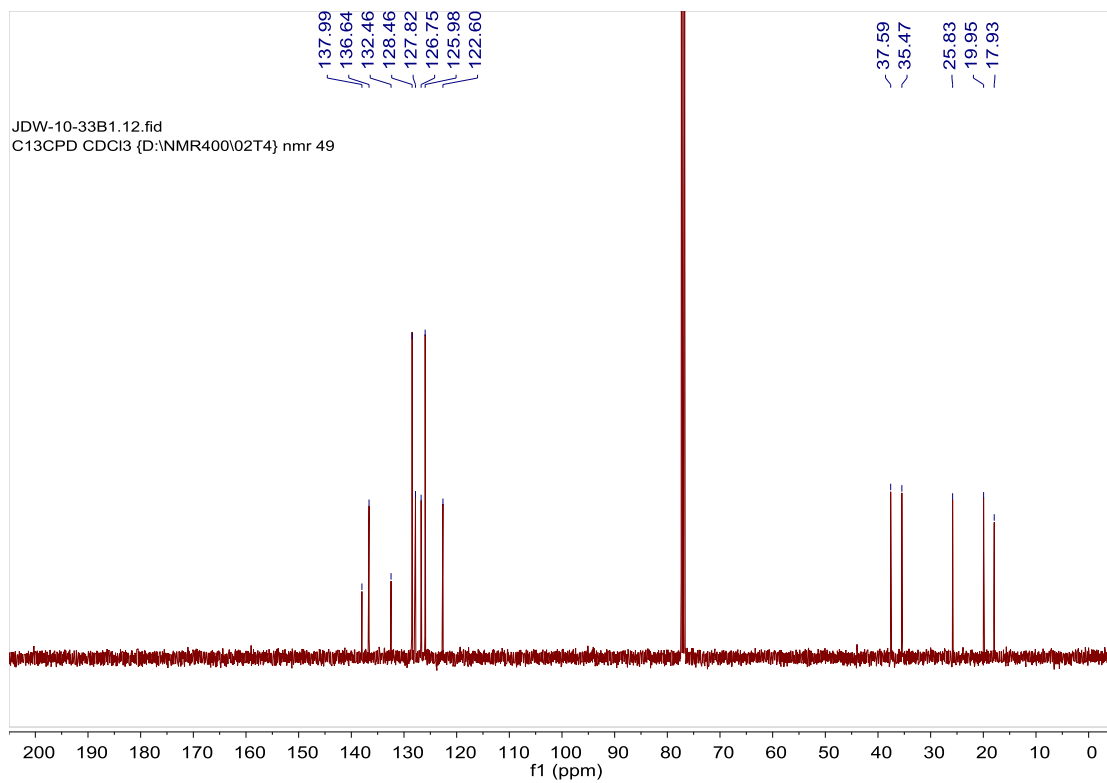



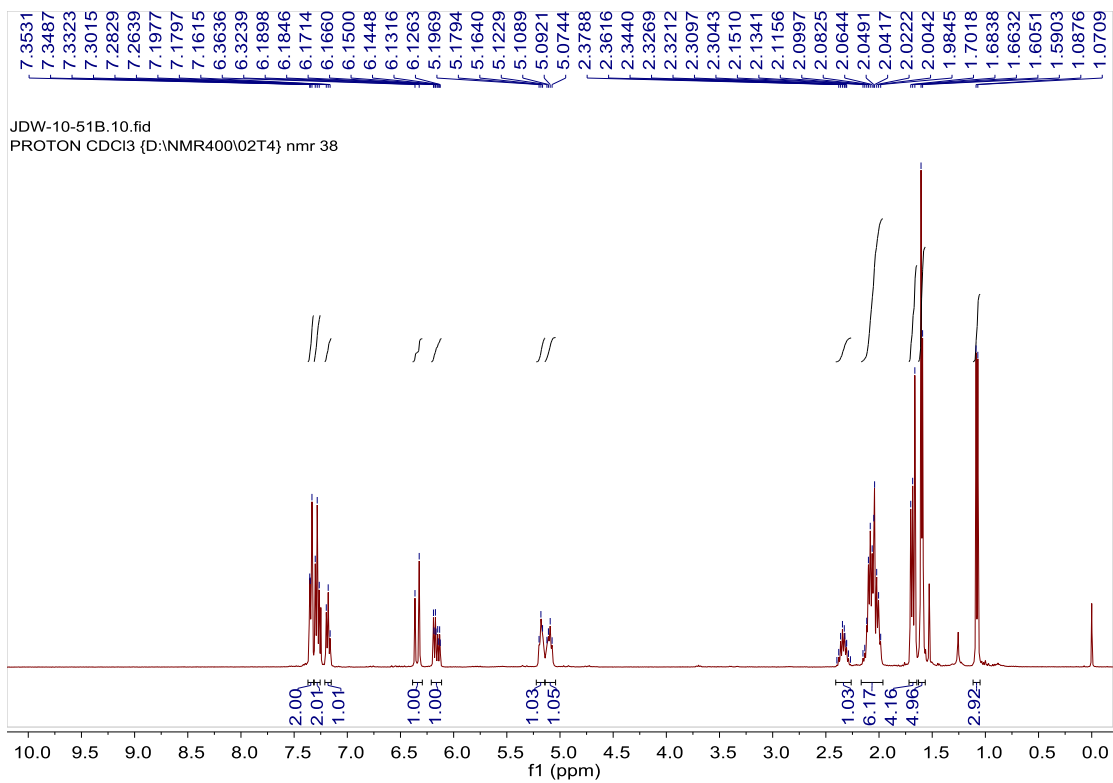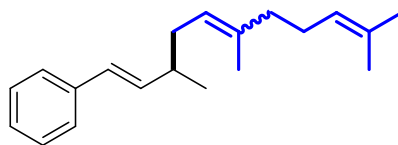

**3t** <sup>1</sup>H NMR (400 MHz, CDCl<sub>3</sub>)  
<sup>13</sup>C NMR (100 MHz, CDCl<sub>3</sub>)

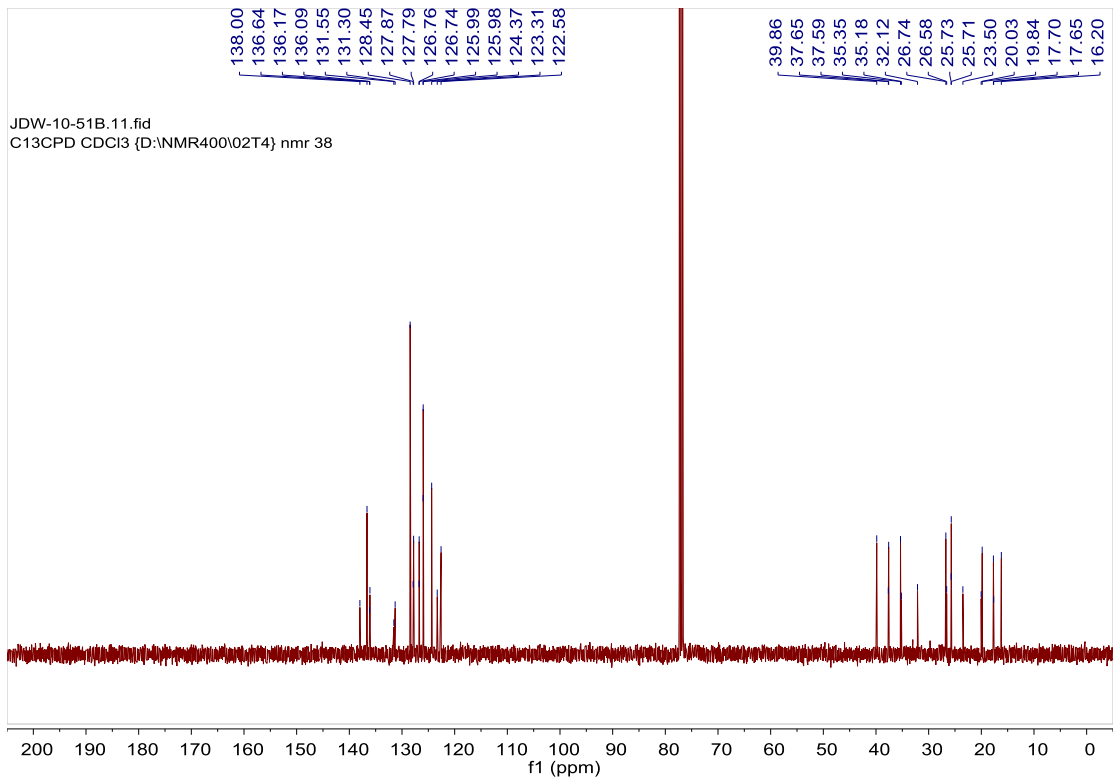

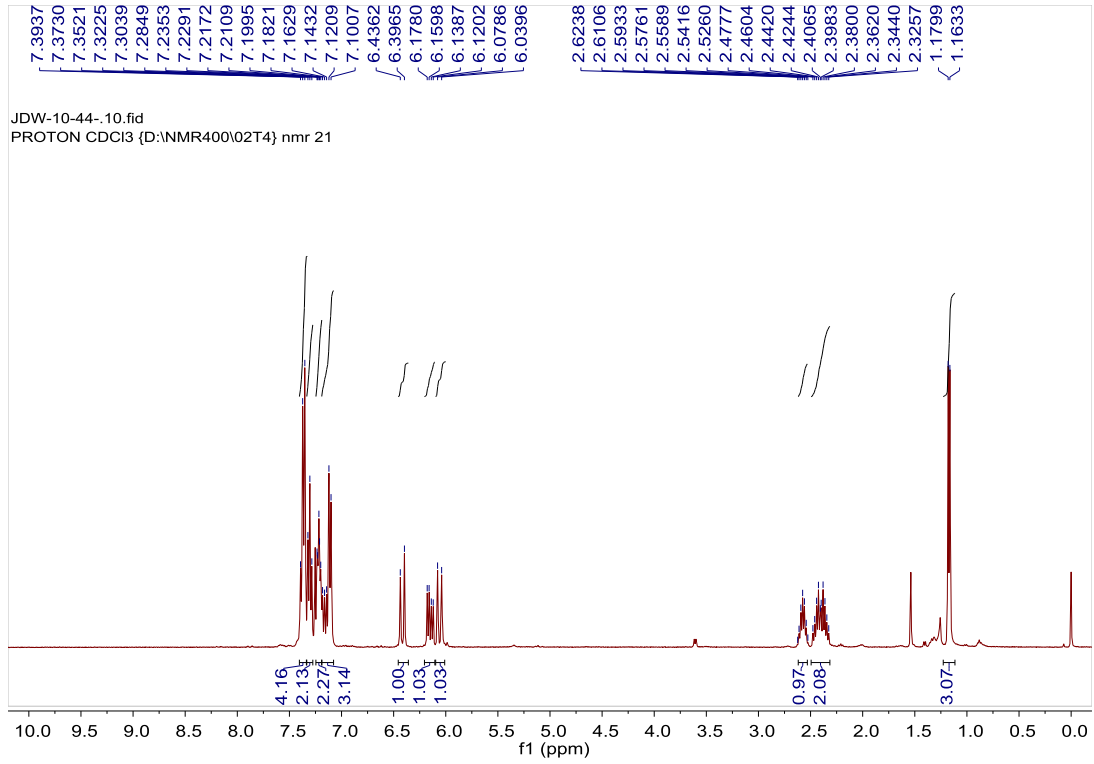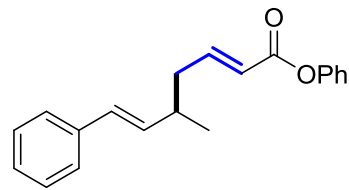

**4** <sup>1</sup>H NMR (400 MHz, CDCl<sub>3</sub>)  
<sup>13</sup>C NMR (100 MHz, CDCl<sub>3</sub>)

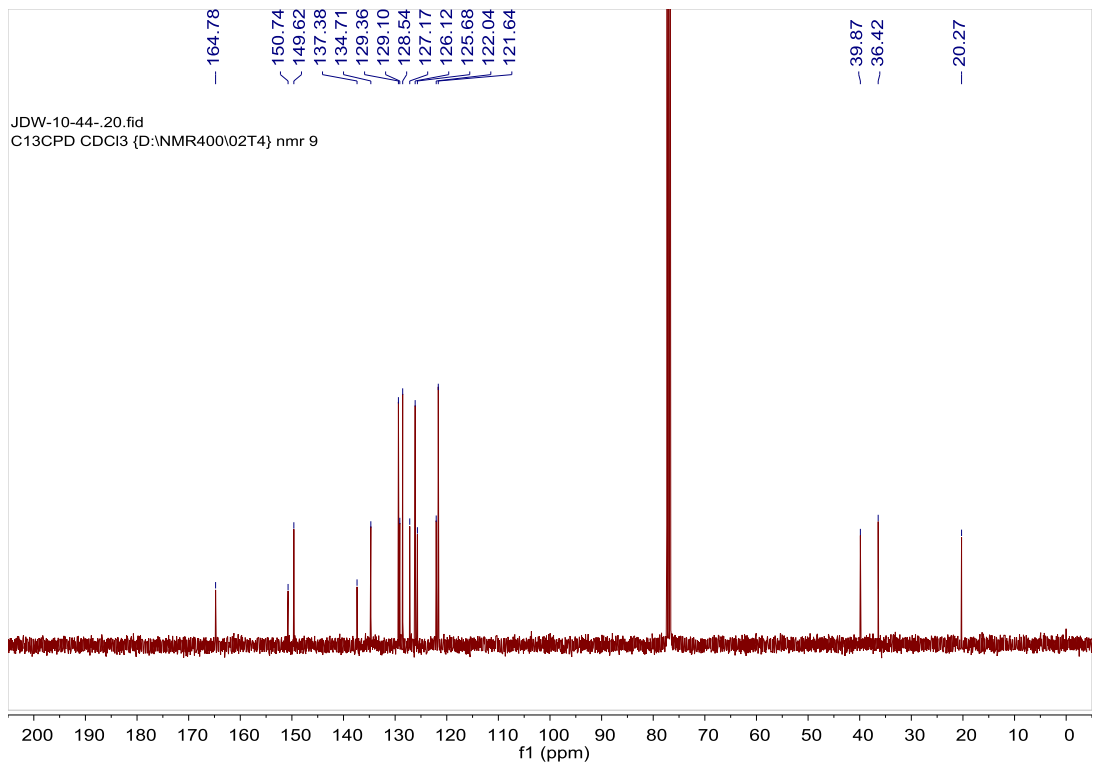

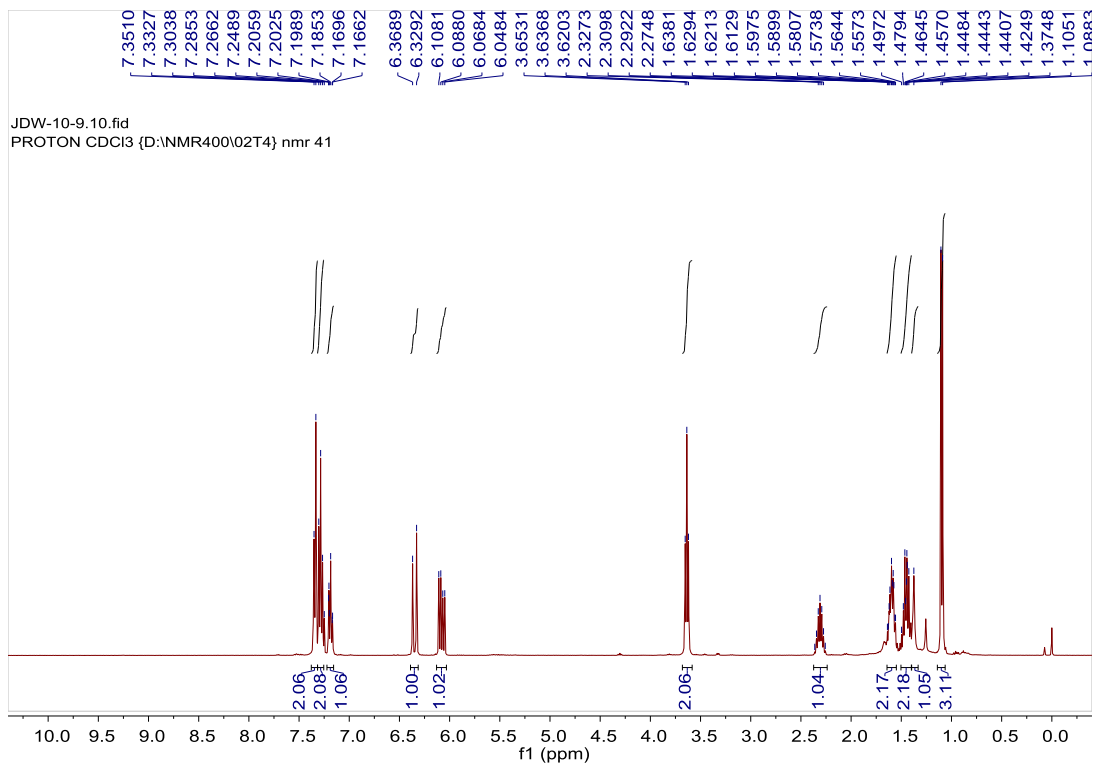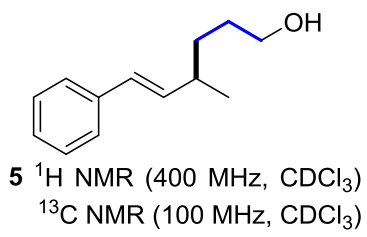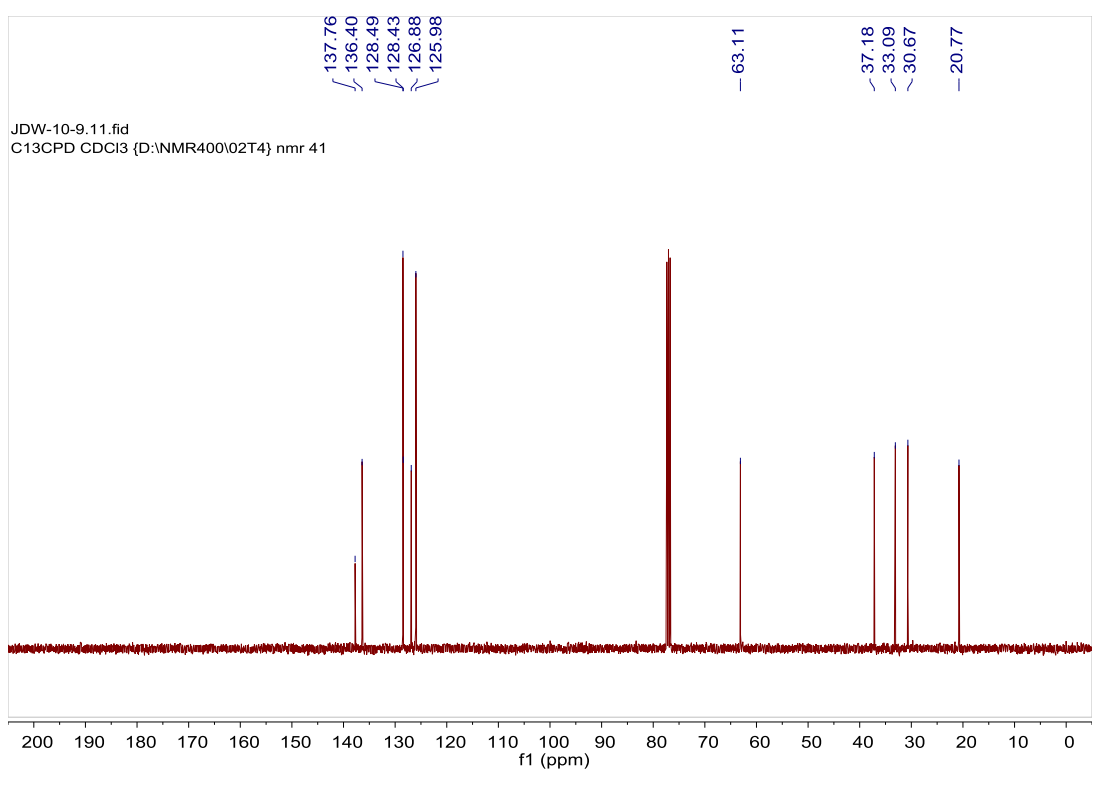

JDW-10-21-D.13.fid  
PROTON CDCl3 {D:\NMR400\02T4} nmr 45

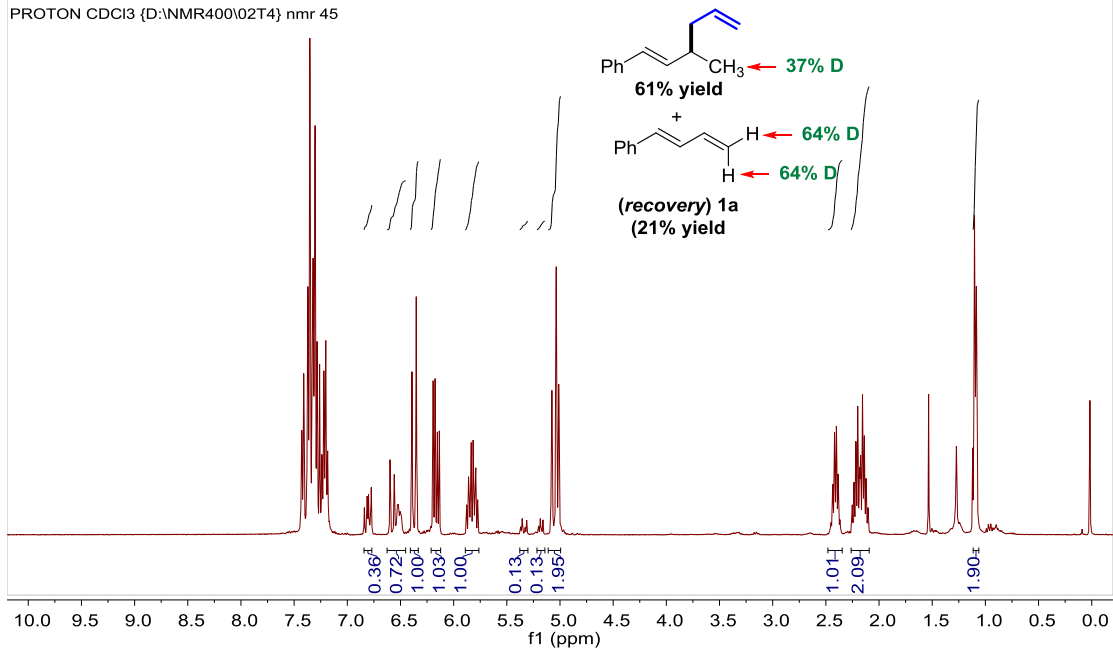

02T4-20191204-JDW-700M/10  
JDW-10-21-

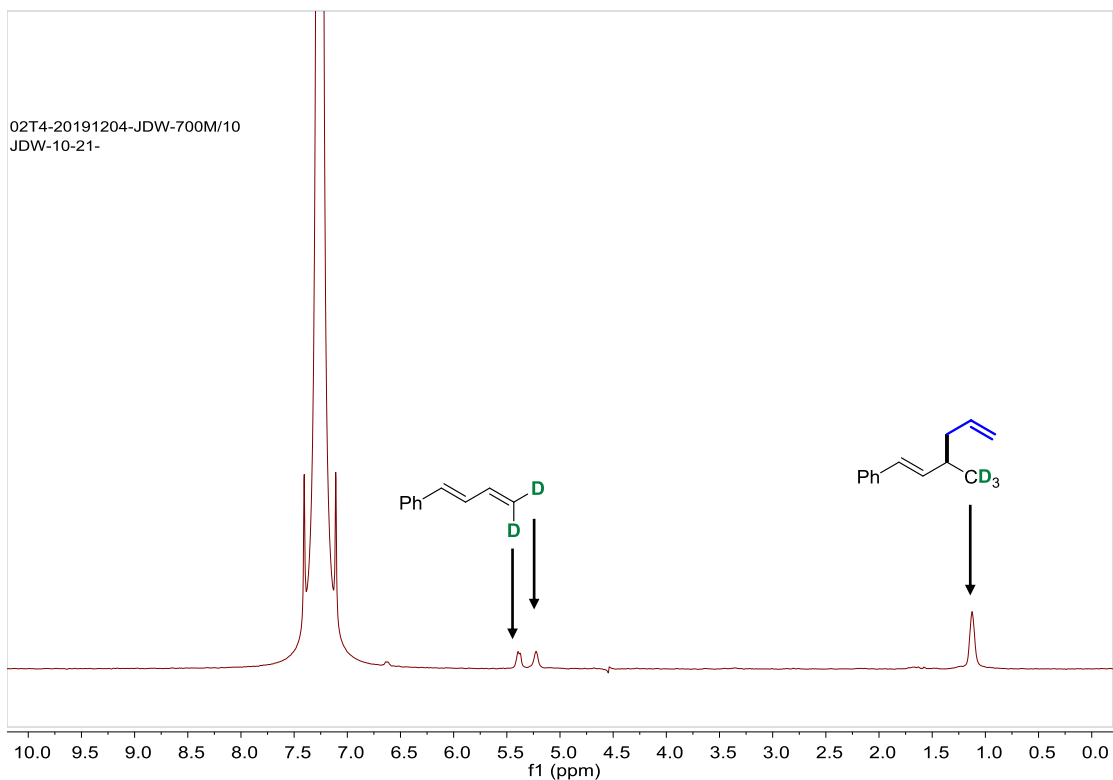

Supplement: d0cc02697b1.pdf [file d0cc02697b1.pdf]
